# Supplementary material
Source: publisher figshare collection journal article supplement (https://gsajournals.figshare.com/articles/dataset/_/11750265)
Supplement: Supplementary file 1 [file 1]

## Sheet: 2014_Planting_List
Table S1. Accession Information and Field Layouts
Plot	Plot Row	Plot Col	Enviro	Accession	Spike type	Plant Name	Source Type	Country	Region	Status	Latitude	Longitude	SP1	SP2	SP3	SP4	SP5	Notes
1001	1	1	Saint_Paul_Field_2014	CIho13141	2-row	CI 13141	COLLECTED	Ethiopia	NA	LANDRACE	10.27	34.99	0.076	0.054	0.021	0.006	0.844
1002	1	2	Saint_Paul_Field_2014	PI182691	2-row	White Chamali	COLLECTED	Syria	Halab	LANDRACE	36.2	37.1667	0.292	0.183	0.27	0.014	0.24	Did not flower. Replaced by another line in 2015.
1003	1	3	Saint_Paul_Field_2014	PI498438	2-row	Pukako	DEVELOPED	New Zealand	NA	CULTIVAR	-40.405	176.078	0.051	0.002	0.889	0.055	0.002
1004	1	4	Saint_Paul_Field_2014	PI608763	2-row	Washonupana	DEVELOPED	United States	Montana	CULTIVAR	46.89	110.36	0.104	0.075	0.624	0.184	0.012
1005	1	5	Saint_Paul_Field_2014	PI371323	2-row	1958C	COLLECTED	Switzerland	Graubunden	LANDRACE	46.6833	8.86667	0.003	0.004	0.512	0.476	0.006
1006	1	6	Saint_Paul_Field_2014	PI429311	2-row	NA	COLLECTED	Yemen	NA	LANDRACE	13.1798	43.9606	0.12	0.031	0.067	0.036	0.746
1007	1	7	Saint_Paul_Field_2014	PI349896	2-row	25362	COLLECTED	Serbia	NA	LANDRACE	43.445	19.7528	0.001	0.001	0.995	0.001	0.001	NAM Parent
1008	1	8	Saint_Paul_Field_2014	PI611527	2-row	Dneprovskii 435	DEVELOPED	Ukraine	Dnipropetrovsk	CULTIVAR	48.448	35.528	0.001	0.001	0.996	0.001	0.001
1009	1	9	Saint_Paul_Field_2014	PI392435	2-row	Welgevallen 60-1-3	DEVELOPED	South Africa	Cape Province	BREEDING	-31.594	18.755	0.345	0.002	0.635	0.014	0.004
1010	1	10	Saint_Paul_Field_2014	PI606305	2-row	15022	COLLECTED	Saudi Arabia	NA	LANDRACE	18.2333	42.5167	0.167	0.052	0.068	0.029	0.684
1011	1	11	Saint_Paul_Field_2014	PI574343	2-row	15050	COLLECTED	Saudi Arabia	NA	UNCERTAIN	22.59	46.93	0.319	0.101	0.094	0.007	0.48
1012	1	12	Saint_Paul_Field_2014	PI306444	2-row	Cluj 123	DEVELOPED	Romania	NA	CULTIVAR	45.068	27.441	0.004	0.089	0.679	0.225	0.004
1013	1	13	Saint_Paul_Field_2014	PI428634	2-row	Topas	DEVELOPED	Czechoslovakia	NA	CULTIVAR	48.976	18.338	0.001	0.001	0.996	0.001	0.001
1014	1	14	Saint_Paul_Field_2014	PI190203	2-row	Eglfinger Monachia	DEVELOPED	Germany	Bavaria	CULTIVAR	48.688	11.058	0.001	0.001	0.993	0.003	0.001	NAM Parent
1015	1	15	Saint_Paul_Field_2014	PI643231	2-row	ND4998	DEVELOPED	United States	North Dakota	BREEDING	47.1102	-100.747	0.002	0.003	0.581	0.412	0.002
1016	1	16	Saint_Paul_Field_2014	PI574302	2-row	PRC-91-SB-7	DEVELOPED	China	Jiangsu	BREEDING	32.514	118.902	0.039	0.026	0.707	0.227	0.002
1017	1	17	Saint_Paul_Field_2014	PI342329	2-row	2606	COLLECTED	Turkey	Kutahya	LANDRACE	39.6325	29.9064	0.122	0.151	0.525	0.054	0.148
1018	1	18	Saint_Paul_Field_2014	PI328336	2-row	HOR 606	COLLECTED	Turkey	NA	LANDRACE	38.7918	37.9844	0.071	0.369	0.333	0.026	0.202	NAM Parent
1019	1	19	Saint_Paul_Field_2014	PI643267	2-row	ND12567	DEVELOPED	United States	North Dakota	BREEDING	47.7263	-100.907	0.027	0.023	0.522	0.425	0.003
1020	1	20	Saint_Paul_Field_2014	PI342270	2-row	2546	COLLECTED	Turkey	Kutahya	LANDRACE	39.3153	29.5977	0.24	0.052	0.347	0.204	0.158
1021	1	21	Saint_Paul_Field_2014	PI350715	2-row	69Z108.179	COLLECTED	Austria	Salzburg	LANDRACE	47.15	13.5	0.004	0.008	0.463	0.507	0.018
1022	1	22	Saint_Paul_Field_2014	PI467375	2-row	Brehat	COLLECTED	France	Cotes-du-Nord	LANDRACE	48.85	-3	0.053	0.041	0.593	0.309	0.004
1023	1	23	Saint_Paul_Field_2014	PI599625	2-row	Krystal	DEVELOPED	Czech Republic	NA	CULTIVAR	49.904	15.13	0.002	0.001	0.993	0.003	0.001	NAM Parent
1024	1	24	Saint_Paul_Field_2014	PI331217	2-row	290b	COLLECTED	Eritrea	Asmara	LANDRACE	15.5891	38.8535	0.004	0.003	0.009	0.004	0.981
1025	1	25	Saint_Paul_Field_2014	PI592250	2-row	Totem	DEVELOPED	United Kingdom	England	CULTIVAR	52.151	-3.23	0.047	0.005	0.91	0.006	0.032	NAM Parent
1026	1	26	Saint_Paul_Field_2014	PI420923	2-row	36	COLLECTED	Jordan	NA	LANDRACE	30.65	35.6333	0.406	0.263	0.078	0.052	0.201
1027	1	27	Saint_Paul_Field_2014	PI592240	2-row	Patriot	DEVELOPED	United Kingdom	England	CULTIVAR	52.11	-1.803	0.32	0.001	0.378	0.299	0.001
1028	1	28	Saint_Paul_Field_2014	PI643376	2-row	ND24379	DEVELOPED	United States	North Dakota	BREEDING	47.5217	-100.993	0.004	0.004	0.456	0.446	0.091
1029	1	29	Saint_Paul_Field_2014	PI5873	2-row	Middle Barley	COLLECTED	Germany	Bavaria	LANDRACE	49.95	10.0833	0.004	0.002	0.436	0.555	0.002
1030	1	30	Saint_Paul_Field_2014	PI392461	2-row	Welgevallen 60-22-4	DEVELOPED	South Africa	Cape Province	BREEDING	-29.3731	21.9466	0.44	0.005	0.546	0.006	0.002
1031	1	31	Saint_Paul_Field_2014	PI268255	2-row	52	COLLECTED	Iran	Fars	LANDRACE	29.9406	51.614	0.284	0.347	0.182	0.017	0.17
1032	1	32	Saint_Paul_Field_2014	PI328938	2-row	Noire Maroc	COLLECTED	Morocco	NA	UNCERTAIN	31.9501	-6.96943	0.005	0.608	0.26	0.005	0.123
1033	1	33	Saint_Paul_Field_2014	PI573675	2-row	SN-1056	COLLECTED	Georgia	NA	LANDRACE	43.4656	42.4347	0.11	0.461	0.235	0.077	0.118
1034	1	34	Saint_Paul_Field_2014	PI344938	2-row	71A	COLLECTED	Bosnia and Herzegovina	NA	LANDRACE	43.5589	19.0725	0.007	0.005	0.858	0.127	0.002	NAM Parent
1035	1	35	Saint_Paul_Field_2014	PI643336	2-row	ND19855	DEVELOPED	United States	North Dakota	BREEDING	47.7109	-101.408	0.003	0.003	0.529	0.462	0.002
1036	1	36	Saint_Paul_Field_2014	CIho15291	6-row	Djebali	COLLECTED	Tunisia	Bizerte	LANDRACE	36.5919	10.4054	0.991	0.004	0.001	0.002	0.002
1037	1	37	Saint_Paul_Field_2014	PI640095	6-row	TX02D310	DEVELOPED	United States	Texas	BREEDING	30.4453	-98.0227	0.039	0.312	0.005	0.639	0.005	NAM Parent
1038	1	38	Saint_Paul_Field_2014	PI84311	6-row	232	COLLECTED	Uzbekistan	Khorazm	LANDRACE	41.6	60.15	0.002	0.988	0.003	0.004	0.002
1039	1	39	Saint_Paul_Field_2014	PI410451	6-row	C18A	COLLECTED	Pakistan	Azad Kashmir	LANDRACE	36.3167	74.8833	0.005	0.963	0.003	0.004	0.026	NAM Parent
1040	1	40	Saint_Paul_Field_2014	PI434815	6-row	QB 714.6	DEVELOPED	Canada	Quebec	BREEDING	53.0792	-73.4147	0.003	0.002	0.057	0.935	0.003
1041	1	41	Saint_Paul_Field_2014	PI225019	6-row	Kairyo Bozu	DEVELOPED	Japan	Ehime	CULTIVAR	33.85	132.77	0.012	0.947	0.027	0.007	0.007
1042	1	42	Saint_Paul_Field_2014	PI95229	6-row	511	COLLECTED	Unknown	NA	LANDRACE	NA	NA	0.001	0.001	0.001	0.001	0.997
1043	1	43	Saint_Paul_Field_2014	PI328485	6-row	HOR 1130	COLLECTED	Greece	Crete	LANDRACE	35.0167	26.1	0.983	0.003	0.003	0.003	0.009	NAM Parent
1044	1	44	Saint_Paul_Field_2014	PI574094	6-row	RNB-379	COLLECTED	Nepal	Mechi	LANDRACE	27.0369	88.223	0.143	0.804	0.005	0.041	0.007	NAM Parent
1045	1	45	Saint_Paul_Field_2014	PI640250	6-row	TX01D247	DEVELOPED	United States	Texas	BREEDING	30.1927	-98.2753	0.037	0.005	0.072	0.878	0.009
1046	1	46	Saint_Paul_Field_2014	PI420459	6-row	IV/188	COLLECTED	Macedonia	NA	LANDRACE	41.6086	21.7453	0.111	0.008	0.008	0.869	0.005
1047	1	47	Saint_Paul_Field_2014	PI640295	6-row	TX01D292	DEVELOPED	United States	Texas	BREEDING	32.3822	-99.8075	0.406	0.116	0.003	0.466	0.008
1048	1	48	Saint_Paul_Field_2014	PI237581	6-row	II-831-4B-1B-1-5B	DEVELOPED	Colombia	Cundinamarca	BREEDING	4.847	-74.2585	0.479	0.008	0.059	0.198	0.255
1049	1	49	Saint_Paul_Field_2014	PI584786	6-row	GSM-11	COLLECTED	Iraq	NA	LANDRACE	33.2232	43.6793	0.553	0.172	0.085	0.013	0.178	NAM Parent
1050	1	50	Saint_Paul_Field_2014	PI402037	6-row	MCU 3559	COLLECTED	Colombia	Cundinamarca	UNCERTAIN	5.49166	-73.6695	0.265	0.003	0.006	0.541	0.185	NAM Parent
1051	1	51	Saint_Paul_Field_2014	PI173518	6-row	6699	COLLECTED	Turkey	Samsun	LANDRACE	41.6167	35.6167	0.414	0.005	0.024	0.553	0.004	NAM Parent
1052	1	52	Saint_Paul_Field_2014	PI329122	6-row	Szekacs 31	DEVELOPED	Hungary	NA	CULTIVAR	46.816	18.41	0.17	0.002	0.002	0.824	0.001
1053	1	53	Saint_Paul_Field_2014	PI223446	6-row	Jow	COLLECTED	Afghanistan	Badakhshan	LANDRACE	37.1175	70.5797	0.002	0.993	0.002	0.002	0.002
1054	1	54	Saint_Paul_Field_2014	PI467738	6-row	Porvenir	DEVELOPED	Mexico	NA	CULTIVAR	23.4136	-102.477	0.53	0.002	0.087	0.374	0.008
1055	1	55	Saint_Paul_Field_2014	PI290306	6-row	Szekacs Tak	DEVELOPED	Hungary	NA	CULTIVAR	46.944	20.932	0.088	0.002	0.439	0.467	0.003
1056	1	56	Saint_Paul_Field_2014	PI564501	6-row	K'ochala	DEVELOPED	Bolivia	NA	CULTIVAR	-18.69	-66.44	0.001	0.001	0.001	0.001	0.996
1057	1	57	Saint_Paul_Field_2014	CIho14124	6-row	473	COLLECTED	Ethiopia	Welo	LANDRACE	11.1333	39.6333	0.001	0.001	0.001	0.001	0.996
1058	1	58	Saint_Paul_Field_2014	PI290316	6-row	Kama Kuro	COLLECTED	Hungary	Pest	UNCERTAIN	47.1773	19.2227	0.001	0.996	0.001	0.001	0.001
1059	1	59	Saint_Paul_Field_2014	PI296459	6-row	H-2213	COLLECTED	Eritrea	NA	LANDRACE	14.6833	39.4167	0.991	0.002	0.002	0.002	0.003
1060	1	60	Saint_Paul_Field_2014	PI282616	6-row	11007	COLLECTED	Israel	NA	LANDRACE	30.715	34.727	0.108	0.013	0.024	0.829	0.025	NAM Parent
1061	1	61	Saint_Paul_Field_2014	PI640339	6-row	TX01D336	DEVELOPED	United States	Texas	BREEDING	32.5006	-97.5864	0.088	0.24	0.002	0.666	0.004
1062	1	62	Saint_Paul_Field_2014	PI640227	6-row	TX01D223	DEVELOPED	United States	Texas	BREEDING	30.3974	-98.0706	0.122	0.131	0.003	0.713	0.03
1063	1	63	Saint_Paul_Field_2014	PI221326	6-row	Smooth Awn	COLLECTED	Serbia	NA	UNCERTAIN	44.0167	19.6167	0.066	0.287	0.06	0.584	0.003
1064	1	64	Saint_Paul_Field_2014	PI129499	6-row	Sobieszynski	DEVELOPED	Poland	NA	CULTIVAR	52.521	18.734	0.001	0.001	0.002	0.994	0.001
1065	1	65	Saint_Paul_Field_2014	PI605699	6-row	Mahigan	DEVELOPED	Canada	Alberta	CULTIVAR	53.6885	-116.368	0.188	0.103	0.179	0.514	0.016
1066	1	66	Saint_Paul_Field_2014	PI467764	6-row	RD-216	DEVELOPED	India	Rajasthan	CULTIVAR	27.03	74.22	0.155	0.732	0.039	0.016	0.058
1067	1	67	Saint_Paul_Field_2014	PI564468	6-row	Vejen Kt-2031	COLLECTED	Bulgaria	Plovdiv	CULTIVAR	42.605	24.3082	0.454	0.003	0.074	0.467	0.002
1068	1	68	Saint_Paul_Field_2014	PI402078	6-row	MCU 3600	COLLECTED	Colombia	Cundinamarca	UNCERTAIN	4.92522	-74.1029	0.358	0.003	0.208	0.424	0.007
1069	1	69	Saint_Paul_Field_2014	PI95270	6-row	399a	COLLECTED	Unknown	NA	LANDRACE	NA	NA	0.001	0.001	0.001	0.001	0.996
1070	1	70	Saint_Paul_Field_2014	PI190711	6-row	Taiju Omugi	COLLECTED	Japan	Hokkaido	LANDRACE	40.7167	142.5	0.001	0.001	0.002	0.995	0.001	NAM Parent
1071	2	70	Saint_Paul_Field_2014	PI94919	6-row	523	COLLECTED	Ukraine	Kharkiv	LANDRACE	50.0559	36.6058	0.11	0.047	0.205	0.628	0.01
1072	2	69	Saint_Paul_Field_2014	PI328632	6-row	HOR 1379	COLLECTED	Greece	Crete	LANDRACE	35.3667	23.6333	0.387	0.002	0.002	0.003	0.606	NAM Parent
1073	2	68	Saint_Paul_Field_2014	Rasmussen	6-row	Rasmussen	DEVELOPED	United States	Minnesota	CULTIVAR	NA	NA	NA	NA	NA	NA	NA	Primary Check
1074	2	67	Saint_Paul_Field_2014	PI611502	6-row	Arkhangel'skii Mestnyi	DEVELOPED	Russian Federation	Arkhangelsk	CULTIVAR	64.566	40.597	0.002	0.001	0.003	0.989	0.004
1075	2	66	Saint_Paul_Field_2014	PI283456	6-row	Orge 628	DEVELOPED	Morocco	NA	CULTIVAR	33.4637	-3.65499	0.875	0.006	0.014	0.077	0.028
1076	2	65	Saint_Paul_Field_2014	PI225037	6-row	Heine Fl 0367/53	DEVELOPED	Germany	Lower Saxony	BREEDING	52.6367	9.84507	0.385	0.038	0.309	0.259	0.009
1077	2	64	Saint_Paul_Field_2014	CIho10036	6-row	Jadar II	DEVELOPED	Norway	NA	CULTIVAR	62.423	10.245	0.004	0.002	0.005	0.986	0.003
1078	2	63	Saint_Paul_Field_2014	Rasmussen	6-row	Rasmussen	DEVELOPED	United States	Minnesota	CULTIVAR	NA	NA	NA	NA	NA	NA	NA	Primary Check
1079	2	62	Saint_Paul_Field_2014	PI531896	6-row	1271	COLLECTED	Egypt	NA	UNCERTAIN	27.53	30.03	0.667	0.151	0.011	0.002	0.169	NAM Parent
1080	2	61	Saint_Paul_Field_2014	CIho4176	6-row	5983	COLLECTED	Afghanistan	Baghlan	LANDRACE	NA	NA	NA	NA	NA	NA	NA	Excluded from GWAS due to high amounts of missing SNP data or heterozygosity.
1081	2	60	Saint_Paul_Field_2014	PI327967	6-row	Olli	DEVELOPED	Finland	NA	CULTIVAR	61.9367	25.7608	0.002	0.001	0.002	0.994	0.002
1082	2	59	Saint_Paul_Field_2014	PI273905	6-row	1997	COLLECTED	Ethiopia	Kefa	LANDRACE	7.54025	36.2534	0.008	0.003	0.002	0.007	0.98
1083	2	58	Saint_Paul_Field_2014	Rasmussen	6-row	Rasmussen	DEVELOPED	United States	Minnesota	CULTIVAR	NA	NA	NA	NA	NA	NA	NA	Primary Check
1084	2	57	Saint_Paul_Field_2014	PI595789	6-row	88Ab536-B	DEVELOPED	United States	Idaho	BREEDING	43.9044	114.506	0.002	0.078	0.003	0.912	0.005
1085	2	56	Saint_Paul_Field_2014	PI328417	6-row	HOR 703	COLLECTED	Greece	Central Greece	LANDRACE	37.9333	23.5333	0.906	0.037	0.034	0.015	0.008
1086	2	55	Saint_Paul_Field_2014	CIho6294	6-row	CI 6294	COLLECTED	Turkey	Malatya	LANDRACE	38.3533	38.3119	0.381	0.014	0.056	0.544	0.006	NAM Parent
1087	2	54	Saint_Paul_Field_2014	PI640006	6-row	TX99D684	DEVELOPED	United States	Texas	BREEDING	32.547	-97.54	0.068	0.122	0.128	0.679	0.004
1088	2	53	Saint_Paul_Field_2014	Rasmussen	6-row	Rasmussen	DEVELOPED	United States	Minnesota	CULTIVAR	NA	NA	NA	NA	NA	NA	NA	Primary Check
1089	2	52	Saint_Paul_Field_2014	PI402364	6-row	MCU 3886	COLLECTED	Colombia	Cundinamarca	UNCERTAIN	4.63303	-73.9551	0.509	0.004	0.008	0.361	0.117
1090	2	51	Saint_Paul_Field_2014	CIho6092	6-row	C.A.N. 1105	DEVELOPED	Canada	Ontario	BREEDING	51.4038	85.4732	0.015	0.105	0.018	0.85	0.012
1091	2	50	Saint_Paul_Field_2014	PI402322	6-row	MCU 3844	COLLECTED	Colombia	Cundinamarca	UNCERTAIN	5.48169	-74.5845	0.268	0.002	0.076	0.65	0.003
1092	2	49	Saint_Paul_Field_2014	PI327860	6-row	HOR 4182	COLLECTED	Turkmenistan	NA	LANDRACE	39.1671	59.3986	0.002	0.99	0.002	0.005	0.002	Secondary Check 2
1093	2	48	Saint_Paul_Field_2014	Rasmussen	6-row	Rasmussen	DEVELOPED	United States	Minnesota	CULTIVAR	NA	NA	NA	NA	NA	NA	NA	Primary Check
1094	2	47	Saint_Paul_Field_2014	PI434738	6-row	QB 701.7	DEVELOPED	Canada	Quebec	BREEDING	53.1003	-73.3936	0.005	0.008	0.005	0.78	0.202
1095	2	46	Saint_Paul_Field_2014	PI640174	6-row	TX01D168	DEVELOPED	United States	Texas	BREEDING	30.3035	-98.1645	0.176	0.009	0.003	0.807	0.005
1096	2	45	Saint_Paul_Field_2014	PI434794	6-row	QB 709.4	DEVELOPED	Canada	Quebec	BREEDING	52.9823	-73.5116	0.004	0.003	0.007	0.984	0.002	NAM Parent
1097	2	44	Saint_Paul_Field_2014	CIho14880	6-row	ELS 6402-467	COLLECTED	Eritrea	Asmara	LANDRACE	15.3062	38.9933	0.001	0.001	0.001	0.001	0.996
1098	2	43	Saint_Paul_Field_2014	Rasmussen	6-row	Rasmussen	DEVELOPED	United States	Minnesota	CULTIVAR	NA	NA	NA	NA	NA	NA	NA	Primary Check
1099	2	42	Saint_Paul_Field_2014	PI402445	6-row	MCU 3967	COLLECTED	Colombia	Cundinamarca	UNCERTAIN	5.3054	-73.8914	0.512	0.005	0.325	0.047	0.111
1100	2	41	Saint_Paul_Field_2014	PI447260	6-row	NA	DEVELOPED	Spain	Zaragoza	BREEDING	41.593	-0.894	0.993	0.002	0.002	0.002	0.002
1101	2	40	Saint_Paul_Field_2014	PI402127	6-row	MCU 3649	COLLECTED	Colombia	Cundinamarca	UNCERTAIN	4.83827	-74.2998	0.203	0.008	0.005	0.78	0.004
1102	2	39	Saint_Paul_Field_2014	PI152256	6-row	Lignee 185 de Gembloux	DEVELOPED	Belgium	Namur	CULTIVAR	NA	NA	NA	NA	NA	NA	NA	Excluded from GWAS due to high amounts of missing SNP data or heterozygosity.
1103	2	38	Saint_Paul_Field_2014	Rasmussen	6-row	Rasmussen	DEVELOPED	United States	Minnesota	CULTIVAR	NA	NA	NA	NA	NA	NA	NA	Primary Check
1104	2	37	Saint_Paul_Field_2014	PI608667	6-row	UC 937	DEVELOPED	United States	California	CULTIVAR	36.7783	-119.418	0.476	0.077	0.039	0.347	0.061
1105	2	36	Saint_Paul_Field_2014	PI270667	6-row	69	COLLECTED	Peru	Puno	LANDRACE	NA	NA	NA	NA	NA	NA	NA	Excluded from GWAS due to high amounts of missing SNP data or heterozygosity.
1106	2	35	Saint_Paul_Field_2014	PI599627	2-row	Rubin	DEVELOPED	Czech Republic	NA	CULTIVAR	49.798	13.009	0.003	0.001	0.846	0.002	0.148
1107	2	34	Saint_Paul_Field_2014	PI614939	2-row	Heris	DEVELOPED	Czech Republic	South Moravia	CULTIVAR	48.994	16.847	0.036	0.06	0.819	0.004	0.08	Secondary Check 1
1108	2	33	Saint_Paul_Field_2014	Conlon	2-row	Conlon	DEVELOPED	United States	North Dakota	CULTIVAR	NA	NA	NA	NA	NA	NA	NA	Primary Check
1109	2	32	Saint_Paul_Field_2014	PI584962	2-row	Mi Mai 114	COLLECTED	China	Zhejiang	LANDRACE	28.6904	119.977	0.013	0.359	0.475	0.147	0.006	Secondary Check 2
1110	2	31	Saint_Paul_Field_2014	CIho14978	2-row	ELS 6402-565	COLLECTED	Ethiopia	Tigre	LANDRACE	13.65	39.5667	0.001	0.001	0.002	0.001	0.994
1111	2	30	Saint_Paul_Field_2014	CIho13135	2-row	Haisa	DEVELOPED	Germany	Lower Saxony	CULTIVAR	52.919	9.557	0.001	0.001	0.996	0.001	0.001	NAM Parent
1112	2	29	Saint_Paul_Field_2014	PI564502	2-row	Nusta	DEVELOPED	Bolivia	NA	CULTIVAR	-15.41	-66.36	0.001	0.002	0.001	0.001	0.995
1113	2	28	Saint_Paul_Field_2014	Conlon	2-row	Conlon	DEVELOPED	United States	North Dakota	CULTIVAR	NA	NA	NA	NA	NA	NA	NA	Primary Check
1114	2	27	Saint_Paul_Field_2014	PI643247	2-row	ND8763	DEVELOPED	United States	North Dakota	BREEDING	46.385	-101.79	0.007	0.003	0.681	0.306	0.003
1115	2	26	Saint_Paul_Field_2014	PI268176	2-row	Stupicky Hanacky	DEVELOPED	Czechoslovakia	NA	CULTIVAR	49.6022	14.4863	0.004	0.002	0.852	0.14	0.003	NAM Parent
1116	2	25	Saint_Paul_Field_2014	PI374429	2-row	29/71-42/3	COLLECTED	Serbia	NA	LANDRACE	43.2872	20.6153	0.008	0.104	0.809	0.076	0.003	NAM Parent
1117	2	24	Saint_Paul_Field_2014	PI327969	2-row	Vankkuri	DEVELOPED	Finland	NA	CULTIVAR	61.9819	25.3969	0.001	0.001	0.994	0.002	0.002	NAM Parent
1118	2	23	Saint_Paul_Field_2014	Conlon	2-row	Conlon	DEVELOPED	United States	North Dakota	CULTIVAR	NA	NA	NA	NA	NA	NA	NA	Primary Check
1119	2	22	Saint_Paul_Field_2014	PI467850	2-row	Antarctica 06	DEVELOPED	Brazil	NA	CULTIVAR	-13.196	-45.053	0.009	0.007	0.785	0.184	0.015
1120	2	21	Saint_Paul_Field_2014	PI392512	2-row	Welgevallen 60-3-88A	DEVELOPED	South Africa	Cape Province	BREEDING	-28.9097	21.9327	0.463	0.003	0.518	0.012	0.004
1121	2	20	Saint_Paul_Field_2014	PI467422	2-row	Stupicky Hanacky	DEVELOPED	Czechoslovakia	NA	CULTIVAR	49.3533	15.0241	0.004	0.002	0.861	0.13	0.002	NAM Parent
1122	2	19	Saint_Paul_Field_2014	PI611534	2-row	Zhodinskii 5	DEVELOPED	Belarus	NA	CULTIVAR	52.684	28.501	0.097	0.07	0.779	0.042	0.011
1123	2	18	Saint_Paul_Field_2014	Conlon	2-row	Conlon	DEVELOPED	United States	North Dakota	CULTIVAR	NA	NA	NA	NA	NA	NA	NA	Primary Check
1124	2	17	Saint_Paul_Field_2014	PI283464	2-row	Korai Tak Arpa	COLLECTED	Hungary	NA	CULTIVAR	46.7719	19.1136	0.004	0.003	0.785	0.202	0.006	NAM Parent
1125	2	16	Saint_Paul_Field_2014	PI182373	2-row	7141	COLLECTED	Turkey	Bayburt	LANDRACE	40.2833	40.1833	0.187	0.248	0.352	0.018	0.195
1126	2	15	Saint_Paul_Field_2014	PI178636	2-row	9840	COLLECTED	Iraq	Baghdad	LANDRACE	33.3	44.6	0.241	0.322	0.173	0.036	0.228
1127	2	14	Saint_Paul_Field_2014	PI392471	2-row	Welgevallen 65-52-2	DEVELOPED	South Africa	Cape Province	BREEDING	-33.171	22.907	0.356	0.002	0.636	0.004	0.002
1128	2	13	Saint_Paul_Field_2014	Conlon	2-row	Conlon	DEVELOPED	United States	North Dakota	CULTIVAR	NA	NA	NA	NA	NA	NA	NA	Primary Check
1129	2	12	Saint_Paul_Field_2014	PI371017	2-row	779F	COLLECTED	Switzerland	Bern	LANDRACE	46.7305	8.01924	0.006	0.005	0.587	0.386	0.016
1130	2	11	Saint_Paul_Field_2014	PI573703	2-row	SN-2738a	COLLECTED	Georgia	NA	LANDRACE	41.7231	42.9964	0.112	0.364	0.329	0.01	0.185
1131	2	10	Saint_Paul_Field_2014	PI467786	2-row	Aramir	DEVELOPED	Netherlands	South Holland	CULTIVAR	52.112	4.409	0.003	0.002	0.972	0.012	0.011
1132	2	9	Saint_Paul_Field_2014	PI290193	2-row	Feiner Original	COLLECTED	Hungary	Pest	CULTIVAR	47.2604	19.6025	0.003	0.001	0.894	0.098	0.003	NAM Parent
1133	2	8	Saint_Paul_Field_2014	Conlon	2-row	Conlon	DEVELOPED	United States	North Dakota	CULTIVAR	NA	NA	NA	NA	NA	NA	NA	Primary Check
1134	2	7	Saint_Paul_Field_2014	PI599622	2-row	Safir	DEVELOPED	Czech Republic	NA	CULTIVAR	50.369	13.779	0.003	0.049	0.941	0.003	0.005
1135	2	6	Saint_Paul_Field_2014	PI574091	6-row	RNB-376	COLLECTED	Nepal	Mechi	LANDRACE	26.7304	87.9003	0.093	0.866	0.004	0.016	0.02	Looks 6-row in field. Categorized as 2-row in Muñoz-Amatriaín et al. 2014. Categorized as 6-row in GrainGenes and "IRREGULARE; 2 AND 6 CHARACTERS ON THE SAME SPIKE" in GRIN
1136	2	5	Saint_Paul_Field_2014	PI392484	2-row	Welgevallen 65-55-3	DEVELOPED	South Africa	Cape Province	BREEDING	-31.875	18.425	0.32	0.001	0.674	0.003	0.002	NAM Parent
1137	2	4	Saint_Paul_Field_2014	PI370867	2-row	391A	COLLECTED	Switzerland	Valais	LANDRACE	46.3167	7.95	0.006	0.01	0.455	0.511	0.018
1138	2	3	Saint_Paul_Field_2014	Conlon	2-row	Conlon	DEVELOPED	United States	North Dakota	CULTIVAR	NA	NA	NA	NA	NA	NA	NA	Primary Check
1139	2	2	Saint_Paul_Field_2014	PI498439	2-row	Rupe	DEVELOPED	New Zealand	NA	CULTIVAR	-45.851	168.915	0.251	0.001	0.737	0.009	0.002
1140	2	1	Saint_Paul_Field_2014	PI399492	2-row	Drossel	DEVELOPED	Germany	Mecklenburg-W.P.	CULTIVAR	53.574	11.899	0.002	0.003	0.397	0.597	0.002
1141	3	1	Saint_Paul_Field_2014	PI327676	2-row	Unumli-Arpa	DEVELOPED	Uzbekistan	NA	CULTIVAR	41.39	64.6	0.308	0.006	0.298	0.195	0.194
1142	3	2	Saint_Paul_Field_2014	CIho6880	2-row	Fan Shaped	DEVELOPED	United States	Idaho	GENETIC	43.7376	-114.63	0.09	0.021	0.005	0.007	0.877
1143	3	3	Saint_Paul_Field_2014	PI592267	2-row	Findhorn	DEVELOPED	United Kingdom	Scotland	CULTIVAR	56.96	-4.63	0.001	0.001	0.993	0.004	0.001	NAM Parent
1144	3	4	Saint_Paul_Field_2014	PI95167	2-row	219	COLLECTED	Unknown	NA	LANDRACE	NA	NA	0.004	0.005	0.851	0.137	0.003	NAM Parent
1145	3	5	Saint_Paul_Field_2014	PI573682	2-row	SN-2092a	COLLECTED	Georgia	NA	LANDRACE	42.6403	45.1097	0.066	0.361	0.34	0.072	0.161
1146	3	6	Saint_Paul_Field_2014	PI374420	2-row	10/71-10	COLLECTED	Bosnia and Herzegovina	NA	LANDRACE	44.1436	17.4	0.003	0.001	0.792	0.202	0.002
1147	3	7	Saint_Paul_Field_2014	PI392451	2-row	Welgevallen 65-31-37	DEVELOPED	South Africa	Cape Province	BREEDING	-33.612	23.281	0.375	0.004	0.579	0.039	0.003	NAM Parent
1148	3	8	Saint_Paul_Field_2014	PI247924	2-row	Rivale	DEVELOPED	France	Eure-et-Loir	CULTIVAR	48.519	1.27	0.078	0.002	0.658	0.261	0.002
1149	3	9	Saint_Paul_Field_2014	PI412946	2-row	G 342	COLLECTED	South Africa	Cape Province	UNCERTAIN	-32	22	0.127	0.001	0.868	0.002	0.002	NAM Parent
1150	3	10	Saint_Paul_Field_2014	PI328855	2-row	Mansholts Tweerijige	DEVELOPED	Netherlands	Groningen	CULTIVAR	53.2194	6.5665	0.123	0.002	0.609	0.264	0.002
1151	3	11	Saint_Paul_Field_2014	PI599637	2-row	Malvaz	DEVELOPED	Czech Republic	NA	CULTIVAR	49.585	12.823	0.075	0.009	0.785	0.003	0.129	NAM Parent
1152	3	12	Saint_Paul_Field_2014	PI643257	2-row	ND10270	DEVELOPED	United States	North Dakota	BREEDING	47.5057	-100.736	0.003	0.004	0.604	0.384	0.004
1153	3	13	Saint_Paul_Field_2014	PI592261	2-row	Elliot	DEVELOPED	United Kingdom	Scotland	CULTIVAR	56.94	-4.63	0.004	0.002	0.922	0.004	0.069
1154	3	14	Saint_Paul_Field_2014	PI392493	2-row	Welgevallen 62-2-14-1	DEVELOPED	South Africa	Cape Province	BREEDING	-32.488	20.688	0.517	0.002	0.473	0.006	0.002
1155	3	15	Saint_Paul_Field_2014	PI591928	2-row	Kaputar	DEVELOPED	Australia	New South Wales	CULTIVAR	-32.534	149.191	0.236	0.017	0.689	0.015	0.043	NAM Parent
1156	3	16	Saint_Paul_Field_2014	PI643323	2-row	ND18413-1	DEVELOPED	United States	North Dakota	BREEDING	47.4629	-100.572	0.006	0.004	0.576	0.388	0.026
1157	3	17	Saint_Paul_Field_2014	PI643226	2-row	ND4758-1	DEVELOPED	United States	North Dakota	BREEDING	47.1141	-98.9887	0.002	0.003	0.707	0.281	0.006
1158	3	18	Saint_Paul_Field_2014	PI39368	2-row	Monte Cristo	COLLECTED	India	Bihar	LANDRACE	25.9833	85.6833	0.374	0.217	0.381	0.021	0.008	Planted with 2-row lines but looked 6-row in field. Categorized as 6-row in GrainGenes and GRIN, but categorized as 2-row in Muñoz-Amatriaín et al. 2014.
1159	3	19	Saint_Paul_Field_2014	PI410865	2-row	Varunda	DEVELOPED	Netherlands	Gelderland	CULTIVAR	51.897	5.935	0.052	0.592	0.343	0.009	0.004
1160	3	20	Saint_Paul_Field_2014	PI643274	2-row	ND13296	DEVELOPED	United States	North Dakota	BREEDING	47.4302	-101.334	0.006	0.006	0.531	0.455	0.002
1161	3	21	Saint_Paul_Field_2014	PI330397	2-row	Diamant	DEVELOPED	Czechoslovakia	NA	CULTIVAR	49.628	18.437	0.001	0.001	0.995	0.002	0.001	Did not flower. Replaced by another line in 2015.
1162	3	22	Saint_Paul_Field_2014	PI467849	2-row	FM 437	DEVELOPED	Brazil	Rio Grande do Sul	CULTIVAR	-28.53	-54.692	0.005	0.002	0.633	0.358	0.002	NAM Parent
1163	3	23	Saint_Paul_Field_2014	PI422232	2-row	NA	COLLECTED	Yemen	NA	LANDRACE	15.5459	44.5723	0.111	0.011	0.114	0.03	0.735
1164	3	24	Saint_Paul_Field_2014	PI402016	2-row	MCU 3538	COLLECTED	Colombia	Cundinamarca	UNCERTAIN	4.86262	-73.7895	0.506	0.007	0.06	0.422	0.006
1165	3	25	Saint_Paul_Field_2014	PI361038	2-row	Ymer Ida 18 Selection	DEVELOPED	United Kingdom	England	BREEDING	52.3976	-1.41378	0.001	0.001	0.99	0.003	0.004	NAM Parent
1166	3	26	Saint_Paul_Field_2014	PI350725	2-row	69Z108.189	COLLECTED	Austria	Tirol	LANDRACE	47.05	10.6167	0.007	0.01	0.566	0.411	0.006
1167	3	27	Saint_Paul_Field_2014	PI643339	2-row	ND19922	DEVELOPED	United States	North Dakota	BREEDING	47.3437	-100.656	0.002	0.004	0.58	0.408	0.006
1168	3	28	Saint_Paul_Field_2014	PI371320	2-row	1948G	COLLECTED	Switzerland	Uri	LANDRACE	46.2792	8.91349	0.006	0.008	0.52	0.459	0.008
1169	3	29	Saint_Paul_Field_2014	PI189764	2-row	Heimdal	DEVELOPED	Sweden	Malmohus	CULTIVAR	55.571	13.019	0.001	0.001	0.994	0.002	0.001	NAM Parent
1170	3	30	Saint_Paul_Field_2014	PI467416	2-row	Jarohnevicky	DEVELOPED	Czechoslovakia	NA	CULTIVAR	49.8454	14.475	0.004	0.001	0.963	0.03	0.002	NAM Parent
1171	3	31	Saint_Paul_Field_2014	PI371384	2-row	2001A	COLLECTED	Switzerland	Graubunden	LANDRACE	46.95	10.4	0.036	0.048	0.439	0.474	0.003
1172	3	32	Saint_Paul_Field_2014	PI467412	2-row	Proskowetz Hana Pedigree	DEVELOPED	Austria	NA	CULTIVAR	47.2967	14.479	0.003	0.007	0.968	0.021	0.002	NAM Parent
1173	3	33	Saint_Paul_Field_2014	PI392478	2-row	Welgevallen 60-13-1	DEVELOPED	South Africa	Cape Province	BREEDING	-33.538	20.117	0.605	0.005	0.38	0.008	0.002	NAM Parent
1174	3	34	Saint_Paul_Field_2014	CIho4087	2-row	nudideficiens	COLLECTED	Russian Federation	NA	LANDRACE	61.58	105.39	0.154	0.397	0.26	0.024	0.165
1175	3	35	Saint_Paul_Field_2014	PI422226	2-row	NA	COLLECTED	Yemen	NA	LANDRACE	13.0333	43.9	0.174	0.164	0.01	0.011	0.641
1176	3	36	Saint_Paul_Field_2014	PI573878	6-row	RNB-132	COLLECTED	Nepal	Dhawalagiri	LANDRACE	28.5833	83.3333	0.05	0.915	0.004	0.024	0.008	NAM Parent
1177	3	37	Saint_Paul_Field_2014	PI467733	6-row	Varde	DEVELOPED	Norway	NA	CULTIVAR	60.572	8.5689	0.001	0.001	0.002	0.995	0.001	NAM Parent
1178	3	38	Saint_Paul_Field_2014	PI428411	6-row	Zoapila	DEVELOPED	Mexico	Federal District	CULTIVAR	19.376	-99.086	0.18	0.019	0.013	0.784	0.003	NAM Parent
1179	3	39	Saint_Paul_Field_2014	PI298708	6-row	ELS 6402-317	COLLECTED	Ethiopia	Kefa	LANDRACE	7.73333	36.5833	0.001	0.001	0.001	0.001	0.997	NAM Parent
1180	3	40	Saint_Paul_Field_2014	PI382911	2-row	GAW 72-8	COLLECTED	Ethiopia	Tigre	LANDRACE	14.1346	39.4287	0.002	0.001	0.001	0.002	0.994	Looks 2-row in field. Characterized as 6-row in GrainGenes and "IRREGULARE: 2 AND 6 CHARACTERS ON THE SAME SPIKE" in GRIN database. Categorized as 6-row in Muñoz-Amatriaín et al. 2014.
1181	3	41	Saint_Paul_Field_2014	PI531889	6-row	1055	COLLECTED	Egypt	NA	UNCERTAIN	27.0259	31.1762	0.497	0.261	0.012	0.004	0.226
1182	3	42	Saint_Paul_Field_2014	PI194951	6-row	9243	COLLECTED	Ethiopia	Gonder	LANDRACE	12.8941	37.7019	0.001	0.001	0.001	0.002	0.994
1183	3	43	Saint_Paul_Field_2014	PI223879	6-row	Jow	COLLECTED	Afghanistan	Baghlan	LANDRACE	NA	NA	NA	NA	NA	NA	NA	Excluded from GWAS due to high amounts of missing SNP data or heterozygosity.
1184	3	44	Saint_Paul_Field_2014	PI361914	6-row	Afghanistan 600	COLLECTED	Romania	Brasov	UNCERTAIN	45.75	25.3333	0.183	0.222	0.245	0.342	0.007
1185	3	45	Saint_Paul_Field_2014	PI48133	6-row	California Feed	COLLECTED	Australia	Victoria	UNCERTAIN	-34.25	141.5	0.993	0.002	0.001	0.002	0.002	NAM Parent
1186	3	46	Saint_Paul_Field_2014	PI611139	6-row	Niska	DEVELOPED	Canada	Alberta	CULTIVAR	53.9315	-117	0.089	0.032	0.296	0.492	0.09
1187	3	47	Saint_Paul_Field_2014	PI343714	6-row	2	COLLECTED	Saudi Arabia	NA	UNCERTAIN	24.2888	46.4463	0.23	0.368	0.112	0.006	0.284
1188	3	48	Saint_Paul_Field_2014	CIho7153	6-row	36Ab2568	DEVELOPED	United States	Idaho	BREEDING	44.5327	-115.093	0.43	0.022	0.409	0.134	0.004	Secondary Check 1
1189	3	49	Saint_Paul_Field_2014	PI186125	6-row	Chae-Rae-Baec	COLLECTED	Korea, South	NA	LANDRACE	35.9	127.8	0.004	0.511	0.002	0.481	0.002
1190	3	50	Saint_Paul_Field_2014	CIho14234	6-row	4000	COLLECTED	Mongolia	NA	LANDRACE	47.0709	104.055	0.002	0.988	0.001	0.002	0.007
1191	3	51	Saint_Paul_Field_2014	CIho15624	6-row	Perth	DEVELOPED	Canada	Ontario	CULTIVAR	51.3538	85.4232	0.006	0.008	0.129	0.773	0.084
1192	3	52	Saint_Paul_Field_2014	PI410464	6-row	N31B	COLLECTED	Pakistan	Azad Kashmir	LANDRACE	36.4333	73.3833	0.009	0.308	0.6	0.072	0.01
1193	3	53	Saint_Paul_Field_2014	PI39590	6-row	Cheliff	COLLECTED	Algeria	Mascara	LANDRACE	36.0333	0.133333	0.991	0.002	0.002	0.004	0.002	NAM Parent
1194	3	54	Saint_Paul_Field_2014	PI640214	6-row	TX01D209	DEVELOPED	United States	Texas	BREEDING	30.2522	-98.2158	0.096	0.207	0.004	0.691	0.002
1195	3	55	Saint_Paul_Field_2014	PI640220	6-row	TX01D215	DEVELOPED	United States	Texas	BREEDING	30.4934	-97.9746	0.232	0.016	0.003	0.721	0.028	NAM Parent
1196	3	56	Saint_Paul_Field_2014	PI531917	6-row	1692	COLLECTED	Egypt	Kafr al-Sheikh	LANDRACE	31.3114	31.1558	0.706	0.13	0.018	0.003	0.142	NAM Parent
1197	3	57	Saint_Paul_Field_2014	PI163409	6-row	CIho 7624	COLLECTED	Argentina	Buenos Aires	UNCERTAIN	-36	-60	0.676	0.002	0.008	0.312	0.002	NAM Parent
1198	3	58	Saint_Paul_Field_2014	PI584977	6-row	Tai Yuan Liu Cao Da Mai	COLLECTED	China	Shanxi	LANDRACE	37	112	0.001	0.995	0.001	0.001	0.001	NAM Parent
1199	3	59	Saint_Paul_Field_2014	PI178609	6-row	4633	COLLECTED	Turkey	Amasya	LANDRACE	40.6667	35.8333	0.333	0.003	0.006	0.656	0.004	NAM Parent
1200	3	60	Saint_Paul_Field_2014	PI564649	6-row	7022	COLLECTED	Oman	NA	LANDRACE	23.1667	57.3333	0.966	0.008	0.017	0.006	0.003
1201	3	61	Saint_Paul_Field_2014	PI244823	6-row	5068	COLLECTED	Pakistan	Northern Areas	LANDRACE	36	75	0.004	0.975	0.002	0.005	0.014
1202	3	62	Saint_Paul_Field_2014	PI328052	6-row	Barley Minnesota 331	DEVELOPED	United States	Minnesota	CULTIVAR	46.7296	-94.6859	0.411	0.001	0.003	0.583	0.002	NAM Parent
1203	3	63	Saint_Paul_Field_2014	PI327868	6-row	HOR 4170	COLLECTED	Turkmenistan	Ahal	LANDRACE	37.4833	58.4	0.245	0.007	0.22	0.446	0.082
1204	3	64	Saint_Paul_Field_2014	PI329008	6-row	Mansholts Groninger	DEVELOPED	Netherlands	Groningen	CULTIVAR	53.216	6.566	0.343	0.007	0.008	0.641	0.002
1205	3	65	Saint_Paul_Field_2014	CIho15591	6-row	QB 139.1	DEVELOPED	Canada	Quebec	BREEDING	53.1543	-73.3396	0.007	0.004	0.004	0.733	0.252
1206	3	66	Saint_Paul_Field_2014	PI584904	6-row	Escourgeon Extra Hatif	DEVELOPED	France	NA	CULTIVAR	47.49	3.597	0.788	0.004	0.01	0.196	0.002
1207	3	67	Saint_Paul_Field_2014	PI328155	6-row	HOR 384	COLLECTED	Bulgaria	NA	LANDRACE	42.7339	25.4858	0.147	0.002	0.003	0.847	0.001	NAM Parent
1208	3	68	Saint_Paul_Field_2014	PI392504	6-row	Welgevallen 65-36-5	DEVELOPED	South Africa	Cape Province	BREEDING	-28.6737	21.5577	0.526	0.007	0.433	0.027	0.006
1209	3	69	Saint_Paul_Field_2014	PI356775	6-row	MOR 187/7	COLLECTED	Morocco	NA	LANDRACE	33.364	-6.351	0.664	0.002	0.325	0.007	0.002
1210	3	70	Saint_Paul_Field_2014	PI281525	6-row	Buenos Aires 109	DEVELOPED	Argentina	Buenos Aires	CULTIVAR	-34.5801	-58.416	0.6	0.003	0.061	0.332	0.004
1211	4	70	Saint_Paul_Field_2014	CIho14344	6-row	CI 14344	COLLECTED	Azerbaijan	NA	LANDRACE	40.14	47.58	0.215	0.324	0.245	0.153	0.063
1212	4	69	Saint_Paul_Field_2014	PI434760	6-row	QB 704.3	DEVELOPED	Canada	Quebec	BREEDING	52.9434	-73.5505	0.001	0.001	0.002	0.995	0.001
1213	4	68	Saint_Paul_Field_2014	PI531986	6-row	2695	COLLECTED	Egypt	NA	UNCERTAIN	26.8193	30.9865	0.566	0.211	0.015	0.011	0.197	NAM Parent
1214	4	67	Saint_Paul_Field_2014	PI620640	6-row	AC Ranger	DEVELOPED	Canada	Manitoba	CULTIVAR	55.0667	-97.5167	0.034	0.015	0.015	0.871	0.065
1215	4	66	Saint_Paul_Field_2014	CIho7153	6-row	36Ab2568	DEVELOPED	United States	Idaho	BREEDING	44.5327	-115.093	0.43	0.022	0.409	0.134	0.004	Secondary Check 1
1216	4	65	Saint_Paul_Field_2014	PI290336	6-row	Hatvani 21/1	DEVELOPED	Hungary	Heves	CULTIVAR	47.9058	20.3039	0.225	0.007	0.134	0.632	0.002
1217	4	64	Saint_Paul_Field_2014	PI447146	6-row	NA	COLLECTED	Spain	Zaragoza	UNCERTAIN	41.6833	-1.23333	0.961	0.004	0.004	0.026	0.004
1218	4	63	Saint_Paul_Field_2014	PI422571	6-row	Gipsy	DEVELOPED	Belgium	Namur	CULTIVAR	50.478	4.8287	0.143	0.011	0.574	0.268	0.003
1219	4	62	Saint_Paul_Field_2014	PI190790	6-row	Inumo O	COLLECTED	Korea, North	NA	LANDRACE	40.607	127.241	0.003	0.181	0.002	0.812	0.001	NAM Parent
1220	4	61	Saint_Paul_Field_2014	CIho15498	6-row	WA 10081-63	DEVELOPED	United States	Washington	BREEDING	47.142	-119.908	0.509	0.008	0.003	0.005	0.475
1221	4	60	Saint_Paul_Field_2014	PI157892	6-row	Maranini	COLLECTED	Italy	Latium	UNCERTAIN	42.2911	12.3446	0.813	0.006	0.003	0.003	0.175
1222	4	59	Saint_Paul_Field_2014	PI382860	6-row	GAW 48-12	COLLECTED	Ethiopia	Gonder	LANDRACE	12.7833	37.65	0.001	0.001	0.001	0.001	0.996	NAM Parent
1223	4	58	Saint_Paul_Field_2014	PI181113	6-row	10893	COLLECTED	India	Gujarat	LANDRACE	23.9167	72.3833	0.179	0.617	0.008	0.045	0.151
1224	4	57	Saint_Paul_Field_2014	CIho16676	6-row	Isogenic: 6-Row Small Lateral Lax Head	DEVELOPED	United States	Montana	GENETIC	47.3098	-110.211	0.451	0.029	0.344	0.165	0.011
1225	4	56	Saint_Paul_Field_2014	PI294731	6-row	Komono	COLLECTED	Bulgaria	NA	UNCERTAIN	42.74	25.49	0.001	0.995	0.001	0.001	0.001
1226	4	55	Saint_Paul_Field_2014	PI250365	6-row	K483	COLLECTED	Pakistan	Punjab	LANDRACE	33.529	73.63	0.153	0.728	0.01	0.008	0.102
1227	4	54	Saint_Paul_Field_2014	PI264922	6-row	1051	COLLECTED	Croatia	Primorsko-goranska z	LANDRACE	45.4278	14.9111	0.347	0.005	0.003	0.644	0.001
1228	4	53	Saint_Paul_Field_2014	CIho4069	6-row	4014	COLLECTED	Mongolia	Govi-Altay	LANDRACE	46.5167	96.3333	0.01	0.924	0.004	0.004	0.058
1229	4	52	Saint_Paul_Field_2014	CIho1551	6-row	Albert	DEVELOPED	Canada	Ontario	CULTIVAR	NA	NA	NA	NA	NA	NA	NA	Excluded from GWAS due to high amounts of missing SNP data or heterozygosity.
1230	4	51	Saint_Paul_Field_2014	PI269912	6-row	880	COLLECTED	Pakistan	North-West Frontier	LANDRACE	36.0833	72.05	0.014	0.953	0.016	0.006	0.011
1231	4	50	Saint_Paul_Field_2014	PI277393	6-row	S-18	COLLECTED	Ethiopia	Shewa	LANDRACE	9.06667	38.5	0.001	0.001	0.001	0.001	0.997
1232	4	49	Saint_Paul_Field_2014	PI639999	6-row	TX99D302	DEVELOPED	United States	Texas	BREEDING	30.1164	-98.3516	0.024	0.041	0.005	0.898	0.032
1233	4	48	Saint_Paul_Field_2014	PI467735	6-row	Zoapila	DEVELOPED	Mexico	NA	CULTIVAR	23.157	-102.703	0.187	0.015	0.012	0.783	0.003
1234	4	47	Saint_Paul_Field_2014	PI87782	6-row	Yojo	COLLECTED	Korea, North	Pyongan Nam	LANDRACE	39.9541	126.207	0.002	0.793	0.002	0.202	0.002
1235	4	46	Saint_Paul_Field_2014	CIho16008	6-row	Isogenic: Gillette-Haired Glume (stb,s)	DEVELOPED	United States	Maryland	GENETIC	39.0958	76.6913	0.002	0.045	0.002	0.949	0.002
1236	4	45	Saint_Paul_Field_2014	PI178285	6-row	Siha	COLLECTED	Turkey	Adana	LANDRACE	36.8167	35.75	0.931	0.011	0.003	0.043	0.012
1237	4	44	Saint_Paul_Field_2014	CIho14085	6-row	175	COLLECTED	Tunisia	L'Ariana	UNCERTAIN	36.8667	10.1833	0.994	0.001	0.001	0.002	0.001
1238	4	43	Saint_Paul_Field_2014	PI436144	6-row	108	COLLECTED	Chile	La Araucania	LANDRACE	-39.2167	-73.2333	0.993	0.001	0.002	0.001	0.002
1239	4	42	Saint_Paul_Field_2014	CIho6496	6-row	CI 6496	COLLECTED	China	Xizang	UNCERTAIN	32	90	0.404	0.195	0.314	0.054	0.034
1240	4	41	Saint_Paul_Field_2014	PI564648	6-row	7012	COLLECTED	Oman	NA	LANDRACE	23.5	57.1667	0.332	0.314	0.006	0.003	0.345
1241	4	40	Saint_Paul_Field_2014	PI87180	6-row	Mugi	COLLECTED	Korea, South	Chungchong Puk	LANDRACE	36.2705	127.911	0.002	0.736	0.002	0.259	0.001
1242	4	39	Saint_Paul_Field_2014	PI467790	6-row	KVL 592	DEVELOPED	Denmark	NA	CULTIVAR	56.0614	9.2574	0.065	0.034	0.06	0.829	0.011
1243	4	38	Saint_Paul_Field_2014	PI61533	6-row	3995	COLLECTED	Mongolia	NA	LANDRACE	46.7952	103.417	0.002	0.99	0.002	0.002	0.005	NAM Parent
1244	4	37	Saint_Paul_Field_2014	PI393995	6-row	Hankkija 673	DEVELOPED	Finland	NA	CULTIVAR	63.5515	27.3756	0.03	0.408	0.017	0.477	0.067
1245	4	36	Saint_Paul_Field_2014	PI270692	6-row	94	COLLECTED	Peru	Puno	LANDRACE	-16.1353	-69.794	0.995	0.001	0.001	0.001	0.001	NAM Parent
1246	4	35	Saint_Paul_Field_2014	PI365439	2-row	Hassan	DEVELOPED	Netherlands	South Holland	CULTIVAR	51.884	7.779	0.024	0.004	0.94	0.014	0.018
1247	4	34	Saint_Paul_Field_2014	PI392515	2-row	Welgevallen 60-21-71A	DEVELOPED	South Africa	Cape Province	BREEDING	-32.858	19.48	0.653	0.009	0.32	0.016	0.002
1248	4	33	Saint_Paul_Field_2014	PI94806	2-row	348	COLLECTED	Russian Federation	NA	LANDRACE	41.8736	45.4249	0.083	0.412	0.244	0.072	0.189
1249	4	32	Saint_Paul_Field_2014	PI643370	2-row	ND23146	DEVELOPED	United States	North Dakota	BREEDING	47.1168	-101.363	0.004	0.062	0.502	0.356	0.075
1250	4	31	Saint_Paul_Field_2014	PI234846	2-row	Kenya Research	DEVELOPED	Kenya	Rift Valley	CULTIVAR	-0.527	36.443	0.277	0.047	0.601	0.065	0.011	NAM Parent
1251	4	30	Saint_Paul_Field_2014	PI274620	2-row	Mutans Boryna	DEVELOPED	Poland	NA	CULTIVAR	52.999	20.053	0.001	0.001	0.996	0.001	0.001	NAM Parent
1252	4	29	Saint_Paul_Field_2014	PI268256	2-row	54	COLLECTED	Iran	Fars	LANDRACE	30.2416	51.4588	0.215	0.365	0.242	0.008	0.17
1253	4	28	Saint_Paul_Field_2014	PI350713	2-row	69Z108.177	COLLECTED	Austria	Carinthia	LANDRACE	47.0167	13.6167	0.005	0.003	0.355	0.632	0.006	NAM Parent
1254	4	27	Saint_Paul_Field_2014	PI372077	2-row	Mestnyj	COLLECTED	Armenia	Loá¹™i	LANDRACE	40.9633	44.6517	0.007	0.018	0.586	0.384	0.004
1255	4	26	Saint_Paul_Field_2014	PI399503	2-row	Multum	DEVELOPED	Austria	NA	CULTIVAR	47.808	14.717	0.03	0.001	0.965	0.002	0.002
1256	4	25	Saint_Paul_Field_2014	PI584962	2-row	Mi Mai 114	COLLECTED	China	Zhejiang	LANDRACE	28.6904	119.977	0.013	0.359	0.475	0.147	0.006	Secondary Check 2
1257	4	24	Saint_Paul_Field_2014	CIho14394	2-row	CI 14394	COLLECTED	Armenia	NA	LANDRACE	40.1191	45.0882	0.109	0.237	0.532	0.01	0.112	NAM Parent
1258	4	23	Saint_Paul_Field_2014	PI573659	2-row	SN-8	COLLECTED	Georgia	NA	LANDRACE	42.7825	42.5405	0.088	0.429	0.3	0.047	0.136
1259	4	22	Saint_Paul_Field_2014	PI564487	2-row	Alexis	DEVELOPED	Germany	Bavaria	CULTIVAR	49.892	10.443	0.007	0.004	0.868	0.003	0.118	NAM Parent
1260	4	21	Saint_Paul_Field_2014	PI60701	2-row	Sinai	COLLECTED	Egypt	Sinai	LANDRACE	NA	NA	NA	NA	NA	NA	NA	Excluded from GWAS due to high amounts of missing SNP data or heterozygosity.
1261	4	20	Saint_Paul_Field_2014	PI372084	2-row	Jogeva 1104	DEVELOPED	Estonia	NA	CULTIVAR	59.046	26.337	0.003	0.003	0.983	0.008	0.002
1262	4	19	Saint_Paul_Field_2014	PI370983	2-row	729C	COLLECTED	Switzerland	Valais	LANDRACE	46.45	8.23333	0.007	0.003	0.551	0.433	0.006
1263	4	18	Saint_Paul_Field_2014	PI422230	2-row	NA	COLLECTED	Yemen	NA	LANDRACE	NA	NA	NA	NA	NA	NA	NA	Excluded from all analyses. In 2015, one plant was 2-row but the rest were 6-row. Categorized as 2-row in all databases.
1264	4	17	Saint_Paul_Field_2014	CIho5989	2-row	Spratt Archer	DEVELOPED	Ireland	NA	CULTIVAR	53.1424	-7.69205	0.003	0.01	0.967	0.019	0.002	NAM Parent
1265	4	16	Saint_Paul_Field_2014	PI328742	2-row	Loosdorfer Fruhe Zaya	DEVELOPED	Austria	Lower Austria	CULTIVAR	48.1081	15.8049	0.001	0.002	0.985	0.009	0.002	NAM Parent
1266	4	15	Saint_Paul_Field_2014	PI606311	2-row	15077	COLLECTED	Saudi Arabia	NA	LANDRACE	21.2667	40.4167	0.249	0.126	0.134	0.008	0.482
1267	4	14	Saint_Paul_Field_2014	PI643391	2-row	ND22942	DEVELOPED	United States	North Dakota	BREEDING	47.4924	-101.15	0.026	0.114	0.565	0.263	0.033
1268	4	13	Saint_Paul_Field_2014	PI386524	2-row	IAR/B/431	COLLECTED	Ethiopia	Sidamo	LANDRACE	6.48333	38.5167	0.001	0.001	0.001	0.001	0.997
1269	4	12	Saint_Paul_Field_2014	PI467729	2-row	Moyjar	DEVELOPED	Norway	NA	CULTIVAR	60.472	8.46894	0.002	0.001	0.991	0.003	0.003	NAM Parent
1270	4	11	Saint_Paul_Field_2014	CIho14281	2-row	CI 14281	COLLECTED	Venezuela	Tachira	UNCERTAIN	7.88013	-71.6398	0.005	0.002	0.655	0.335	0.002
1271	4	10	Saint_Paul_Field_2014	PI283401	2-row	Hatvani 1108	DEVELOPED	Hungary	Heves	CULTIVAR	47.7936	20.2215	0.004	0.002	0.986	0.007	0.002	NAM Parent
1272	4	9	Saint_Paul_Field_2014	CIho11587	2-row	Israel 49	COLLECTED	Israel	NA	CULTIVAR	31.1149	35.2393	0.541	0.223	0.071	0.011	0.153
1273	4	8	Saint_Paul_Field_2014	PI643294	2-row	ND15443	DEVELOPED	United States	North Dakota	BREEDING	47.8358	-101.32	0.156	0.01	0.277	0.299	0.258
1274	4	7	Saint_Paul_Field_2014	PI227449	6-row	Jo	COLLECTED	Iran	Fars	LANDRACE	29.2177	53.456	0.189	0.254	0.204	0.335	0.018	NAM Parent. Categorized as both 2-row and 6-row in GRIN. Picture in GRIN looks 2-row, but it looks 6-row in my field. Categorized as 2-row in Muñoz-Amatriaín et al. 2014. Spike row-type not characterized in GrainGenes.
1275	4	6	Saint_Paul_Field_2014	PI447137	2-row	NA	COLLECTED	Spain	Huesca	UNCERTAIN	42.05	-0.583333	0.002	0.001	0.995	0.001	0.001	NAM Parent
1276	4	5	Saint_Paul_Field_2014	PI156658	2-row	231.37	DEVELOPED	Russian Federation	Irkutsk	BREEDING	52.337	104.355	0.002	0.004	0.362	0.629	0.003
1277	4	4	Saint_Paul_Field_2014	CIho13353	2-row	CI 13353	COLLECTED	Ethiopia	Gonder	LANDRACE	12.3188	37.38	0.006	0.069	0.722	0.06	0.142
1278	4	3	Saint_Paul_Field_2014	PI155303	2-row	CIho 7292	COLLECTED	Yemen	NA	LANDRACE	15.55	46.64	0.186	0.052	0.027	0.012	0.724
1279	4	2	Saint_Paul_Field_2014	PI382275	2-row	GAW 66-3	COLLECTED	Ethiopia	Tigre	LANDRACE	14.3167	39.2333	0.001	0.001	0.001	0.001	0.996
1280	4	1	Saint_Paul_Field_2014	PI643244	2-row	ND7556	DEVELOPED	United States	North Dakota	BREEDING	46.3829	-99.8433	0.003	0.004	0.578	0.402	0.013
1281	5	1	Saint_Paul_Field_2014	PI386462	2-row	IAR/B/434	COLLECTED	Ethiopia	Tigre	LANDRACE	14.1667	38.9	0.002	0.002	0.001	0.002	0.993
1282	5	2	Saint_Paul_Field_2014	PI286388	2-row	CIho 12089	COLLECTED	Eritrea	Asmara	LANDRACE	14.8491	38.5891	0.001	0.001	0.001	0.001	0.996	NAM Parent
1283	5	3	Saint_Paul_Field_2014	Conlon	2-row	Conlon	DEVELOPED	United States	North Dakota	CULTIVAR	NA	NA	NA	NA	NA	NA	NA	Primary Check
1284	5	4	Saint_Paul_Field_2014	PI506299	2-row	NRPB 80-2000	DEVELOPED	United Kingdom	England	BREEDING	52.673	-0.9	0.13	0.003	0.861	0.002	0.003
1285	5	5	Saint_Paul_Field_2014	PI344940	2-row	72A	COLLECTED	Bosnia and Herzegovina	NA	LANDRACE	43.742	18.6743	0.003	0.005	0.513	0.357	0.122
1286	5	6	Saint_Paul_Field_2014	PI310480	2-row	Finistere 62-3	COLLECTED	France	NA	UNCERTAIN	47.914	3.727	0.041	0.004	0.555	0.394	0.006
1287	5	7	Saint_Paul_Field_2014	PI386844	2-row	IAR/B/57	COLLECTED	Ethiopia	Tigre	LANDRACE	14.1	38.5	0.001	0.002	0.001	0.002	0.994
1288	5	8	Saint_Paul_Field_2014	Conlon	2-row	Conlon	DEVELOPED	United States	North Dakota	CULTIVAR	NA	NA	NA	NA	NA	NA	NA	Primary Check
1289	5	9	Saint_Paul_Field_2014	PI365547	2-row	Gerkra	DEVELOPED	Netherlands	Groningen	CULTIVAR	53.312	6.221	0.001	0.001	0.994	0.002	0.001	NAM Parent
1290	5	10	Saint_Paul_Field_2014	PI371327	2-row	1964C	COLLECTED	Switzerland	Graubunden	LANDRACE	46.6667	9.23333	0.002	0.006	0.451	0.538	0.003
1291	5	11	Saint_Paul_Field_2014	PI611503	2-row	Akhaltesli Mestnyi	DEVELOPED	Georgia	NA	CULTIVAR	42.6016	43.6431	0.091	0.366	0.322	0.164	0.057
1292	5	12	Saint_Paul_Field_2014	PI372102	2-row	Polesskij	DEVELOPED	Belarus	Minsk	CULTIVAR	53.826	27.502	0.002	0.002	0.949	0.044	0.003	NAM Parent
1293	5	13	Saint_Paul_Field_2014	Conlon	2-row	Conlon	DEVELOPED	United States	North Dakota	CULTIVAR	NA	NA	NA	NA	NA	NA	NA	Primary Check
1294	5	14	Saint_Paul_Field_2014	PI467844	2-row	FM 404	DEVELOPED	Brazil	Rio Grande do Sul	CULTIVAR	-30.499	-53.187	0.022	0.014	0.515	0.447	0.002
1295	5	15	Saint_Paul_Field_2014	PI599649	2-row	Amulet	DEVELOPED	Czech Republic	Central Bohemia	CULTIVAR	49.611	14.112	0.002	0.073	0.838	0.003	0.083	NAM Parent
1296	5	16	Saint_Paul_Field_2014	PI290259	2-row	Dobrovicky Kargyn	DEVELOPED	Czechoslovakia	NA	CULTIVAR	50.032	14.965	0.003	0.005	0.949	0.042	0.001	NAM Parent
1297	5	17	Saint_Paul_Field_2014	PI643383	2-row	ND24564	DEVELOPED	United States	North Dakota	BREEDING	47.8312	-100.909	0.051	0.075	0.384	0.483	0.007
1298	5	18	Saint_Paul_Field_2014	Conlon	2-row	Conlon	DEVELOPED	United States	North Dakota	CULTIVAR	NA	NA	NA	NA	NA	NA	NA	Primary Check
1299	5	19	Saint_Paul_Field_2014	PI264890	2-row	24	COLLECTED	Italy	Sicily	LANDRACE	37.6333	14.7667	0.751	0.022	0.215	0.003	0.009
1300	5	20	Saint_Paul_Field_2014	CIho15313	6-row	Djebali	COLLECTED	Tunisia	Kebili	LANDRACE	33.4524	9.21619	0.934	0.01	0.006	0.02	0.03	Planted with 2-row lines but looked 6-row in field. Categorized as 6-row in GrainGenes and GRIN, but categorized as 2-row in Muñoz-Amatriaín et al. 2014.
1301	5	21	Saint_Paul_Field_2014	PI584766	2-row	Q21861	DEVELOPED	Australia	Western Australia	BREEDING	-27.6728	121.628	0.119	0.215	0.5	0.163	0.003
1302	5	22	Saint_Paul_Field_2014	PI371390	2-row	2004B	COLLECTED	Switzerland	Graubunden	LANDRACE	46.8	10.2333	0.006	0.01	0.468	0.508	0.009	NAM Parent
1303	5	23	Saint_Paul_Field_2014	Conlon	2-row	Conlon	DEVELOPED	United States	North Dakota	CULTIVAR	NA	NA	NA	NA	NA	NA	NA	Primary Check
1304	5	24	Saint_Paul_Field_2014	PI584973	2-row	Ta Cheng Er Leng	COLLECTED	China	Xinjiang	LANDRACE	42.4909	86.2732	0.05	0.005	0.449	0.493	0.003
1305	5	25	Saint_Paul_Field_2014	PI573687	2-row	SN-2158	COLLECTED	Georgia	NA	LANDRACE	42.4056	45.1297	0.118	0.42	0.275	0.025	0.162
1306	5	26	Saint_Paul_Field_2014	PI366439	2-row	1081	COLLECTED	Afghanistan	Ghowr	LANDRACE	34.5519	65.7864	0.129	0.489	0.25	0.007	0.126
1307	5	27	Saint_Paul_Field_2014	PI643292	2-row	ND15403	DEVELOPED	United States	North Dakota	BREEDING	47.4531	-100.63	0.002	0.003	0.508	0.486	0.002
1308	5	28	Saint_Paul_Field_2014	Conlon	2-row	Conlon	DEVELOPED	United States	North Dakota	CULTIVAR	NA	NA	NA	NA	NA	NA	NA	Primary Check
1309	5	29	Saint_Paul_Field_2014	PI146663	2-row	Research	DEVELOPED	Australia	Victoria	CULTIVAR	-37.38	144.84	0.27	0.001	0.721	0.005	0.002
1310	5	30	Saint_Paul_Field_2014	PI386406	2-row	IAR/B/252	COLLECTED	Eritrea	NA	LANDRACE	15.3969	38.8716	0.001	0.001	0.002	0.001	0.995
1311	5	31	Saint_Paul_Field_2014	PI195319	2-row	2744	COLLECTED	Guatemala	Suchitepequez	LANDRACE	14.5333	-91.5	0.454	0.432	0.017	0.01	0.087
1312	5	32	Saint_Paul_Field_2014	PI384986	2-row	Riso Mutant 56	DEVELOPED	Denmark	NA	BREEDING	56.4453	9.38674	0.006	0.001	0.982	0.006	0.005	NAM Parent
1313	5	33	Saint_Paul_Field_2014	Conlon	2-row	Conlon	DEVELOPED	United States	North Dakota	CULTIVAR	NA	NA	NA	NA	NA	NA	NA	Primary Check
1314	5	34	Saint_Paul_Field_2014	PI392521	2-row	Welgevallen 62-13-32	DEVELOPED	South Africa	Cape Province	BREEDING	-29.1071	21.9344	0.532	0.005	0.449	0.011	0.003
1315	5	35	Saint_Paul_Field_2014	PI392491	2-row	Welgevallen 60-A-3-11	DEVELOPED	South Africa	Cape Province	BREEDING	-29.2532	21.6435	0.441	0.002	0.549	0.006	0.002	NAM Parent
1316	5	36	Saint_Paul_Field_2014	PI430745	6-row	NA	COLLECTED	Yemen	NA	LANDRACE	15.65	43.9667	0.005	0.014	0.005	0.974	0.002
1317	5	37	Saint_Paul_Field_2014	PI415348	6-row	IV/155	COLLECTED	Macedonia	NA	LANDRACE	41.609	21.334	0.354	0.003	0.029	0.609	0.005	NAM Parent
1318	5	38	Saint_Paul_Field_2014	Rasmussen	6-row	Rasmussen	DEVELOPED	United States	Minnesota	CULTIVAR	NA	NA	NA	NA	NA	NA	NA	Primary Check
1319	5	39	Saint_Paul_Field_2014	PI371335	6-row	1970BA	COLLECTED	Switzerland	Graubunden	LANDRACE	NA	NA	NA	NA	NA	NA	NA	Excluded from GWAS due to high amounts of missing SNP data or heterozygosity.
1320	5	40	Saint_Paul_Field_2014	PI640226	6-row	TX01D222	DEVELOPED	United States	Texas	BREEDING	30.4548	-98.0132	0.269	0.003	0.005	0.718	0.005	Excluded from GWAS due to high amounts of missing SNP data or heterozygosity. NAM Parent.
1321	5	41	Saint_Paul_Field_2014	PI327680	6-row	HOR 3324	COLLECTED	Ukraine	Odesa	LANDRACE	47.4104	29.667	0.262	0.002	0.008	0.724	0.004	NAM Parent
1322	5	42	Saint_Paul_Field_2014	PI328729	6-row	HOR 1791	COLLECTED	Afghanistan	NA	LANDRACE	33.9391	67.71	0.406	0.002	0.302	0.283	0.006
1323	5	43	Saint_Paul_Field_2014	Rasmussen	6-row	Rasmussen	DEVELOPED	United States	Minnesota	CULTIVAR	NA	NA	NA	NA	NA	NA	NA	Primary Check
1324	5	44	Saint_Paul_Field_2014	PI410483	6-row	N50	COLLECTED	Pakistan	Azad Kashmir	LANDRACE	35.45	74.8	0.011	0.941	0.002	0.003	0.043	NAM Parent
1325	5	45	Saint_Paul_Field_2014	PI328945	6-row	HOR 2486	COLLECTED	Italy	Calabria	LANDRACE	38.1	15.65	0.983	0.001	0.003	0.011	0.002
1326	5	46	Saint_Paul_Field_2014	CIho2353	6-row	Moiris	COLLECTED	Turkmenistan	Mary	UNCERTAIN	37.5909	62.1077	0.002	0.991	0.002	0.003	0.002
1327	5	47	Saint_Paul_Field_2014	PI193799	6-row	8853	COLLECTED	Ethiopia	Shewa	LANDRACE	9.03333	38.7	0.001	0.001	0.001	0.001	0.996
1328	5	48	Saint_Paul_Field_2014	Rasmussen	6-row	Rasmussen	DEVELOPED	United States	Minnesota	CULTIVAR	NA	NA	NA	NA	NA	NA	NA	Primary Check
1329	5	49	Saint_Paul_Field_2014	CIho15582	6-row	QB 137.31	DEVELOPED	Canada	Quebec	BREEDING	53.2723	-73.2217	0.372	0.027	0.079	0.508	0.015
1330	5	50	Saint_Paul_Field_2014	PI76296	6-row	B-90	COLLECTED	Iraq	Baghdad	LANDRACE	32.9703	44.4609	0.22	0.558	0.006	0.005	0.211
1331	5	51	Saint_Paul_Field_2014	CIho15803	6-row	FL7138A3-102	DEVELOPED	United States	Florida	BREEDING	27.6648	-81.5157	0.355	0.181	0.023	0.251	0.189
1332	5	52	Saint_Paul_Field_2014	PI87838	6-row	Karu Bori	COLLECTED	Korea, North	Pyongan Nam	LANDRACE	39.9221	126.718	0.005	0.44	0.003	0.548	0.004
1333	5	53	Saint_Paul_Field_2014	Rasmussen	6-row	Rasmussen	DEVELOPED	United States	Minnesota	CULTIVAR	NA	NA	NA	NA	NA	NA	NA	Primary Check
1334	5	54	Saint_Paul_Field_2014	PI356763	6-row	MOR 17/5	COLLECTED	Morocco	NA	LANDRACE	28.736	-10.459	0.993	0.002	0.001	0.002	0.001
1335	5	55	Saint_Paul_Field_2014	PI87844	6-row	Kubi	COLLECTED	Korea, North	Hamgyong Puk	LANDRACE	42.272	129.955	0.002	0.434	0.001	0.556	0.006	NAM Parent
1336	5	56	Saint_Paul_Field_2014	PI467654	6-row	Kuoreton	COLLECTED	Finland	NA	UNCERTAIN	61.5147	26.2285	0.037	0.338	0.009	0.605	0.01
1337	5	57	Saint_Paul_Field_2014	PI640234	6-row	TX01D230	DEVELOPED	United States	Texas	BREEDING	NA	NA	NA	NA	NA	NA	NA	Excluded from GWAS due to high amounts of missing SNP data or heterozygosity.
1338	5	58	Saint_Paul_Field_2014	Rasmussen	6-row	Rasmussen	DEVELOPED	United States	Minnesota	CULTIVAR	NA	NA	NA	NA	NA	NA	NA	Primary Check
1339	5	59	Saint_Paul_Field_2014	CIho14061	6-row	Bonfarik	COLLECTED	Algeria	NA	UNCERTAIN	34.5	7.32	0.988	0.002	0.003	0.005	0.002
1340	5	60	Saint_Paul_Field_2014	PI223146	6-row	Nabawi	COLLECTED	Jordan	NA	UNCERTAIN	30.5852	36.2384	0.43	0.299	0.028	0.215	0.028
1341	5	61	Saint_Paul_Field_2014	PI640265	6-row	TX01D262	DEVELOPED	United States	Texas	BREEDING	30.5285	-97.9395	0.173	0.133	0.003	0.687	0.005	NAM Parent
1342	5	62	Saint_Paul_Field_2014	PI640298	6-row	TX01D295	DEVELOPED	United States	Texas	BREEDING	32.4616	-97.6254	0.282	0.076	0.003	0.614	0.025
1343	5	63	Saint_Paul_Field_2014	Rasmussen	6-row	Rasmussen	DEVELOPED	United States	Minnesota	CULTIVAR	NA	NA	NA	NA	NA	NA	NA	Primary Check
1344	5	64	Saint_Paul_Field_2014	PI270641	6-row	43	COLLECTED	Peru	Puno	LANDRACE	-15.7281	-69.5863	0.798	0.002	0.002	0.002	0.197
1345	5	65	Saint_Paul_Field_2014	PI640201	6-row	TX01D196	DEVELOPED	United States	Texas	BREEDING	30.3711	-98.0969	0.153	0.098	0.005	0.739	0.005	Did not flower. Replaced by another line in 2015.
1346	5	66	Saint_Paul_Field_2014	PI525187	6-row	Kilta	DEVELOPED	Finland	NA	CULTIVAR	63.6133	27.4374	0.003	0.002	0.032	0.956	0.007
1347	5	67	Saint_Paul_Field_2014	PI532024	6-row	2824	COLLECTED	Egypt	NA	UNCERTAIN	27.3146	30.6732	0.491	0.27	0.007	0.005	0.227
1348	5	68	Saint_Paul_Field_2014	Rasmussen	6-row	Rasmussen	DEVELOPED	United States	Minnesota	CULTIVAR	NA	NA	NA	NA	NA	NA	NA	Primary Check
1349	5	69	Saint_Paul_Field_2014	PI632274	6-row	Creel	DEVELOPED	United States	Idaho	CULTIVAR	44.1182	114.792	0.173	0.008	0.004	0.804	0.011
1350	5	70	Saint_Paul_Field_2014	PI467740	6-row	Puebla	DEVELOPED	Mexico	NA	CULTIVAR	NA	NA	NA	NA	NA	NA	NA	Excluded from GWAS due to high amounts of missing SNP data or heterozygosity.
1351	6	70	Saint_Paul_Field_2014	PI327859	6-row	HOR 4181	COLLECTED	Turkmenistan	NA	LANDRACE	38.9697	59.5563	0.244	0.003	0.008	0.742	0.004	NAM Parent
1352	6	69	Saint_Paul_Field_2014	PI327860	6-row	HOR 4182	COLLECTED	Turkmenistan	NA	LANDRACE	39.1671	59.3986	0.002	0.99	0.002	0.005	0.002	Secondary Check 2
1353	6	68	Saint_Paul_Field_2014	CIho14268	6-row	Wang Ta Mai	COLLECTED	China	Beijing	LANDRACE	40.1738	116.495	0.002	0.991	0.002	0.002	0.004
1354	6	67	Saint_Paul_Field_2014	PI584939	6-row	Ai Gan Qi	COLLECTED	China	Beijing	LANDRACE	40.25	116.5	0.001	0.995	0.001	0.001	0.002	Did not flower. Replaced by another line in 2015.
1355	6	66	Saint_Paul_Field_2014	PI95265	6-row	278	COLLECTED	Unknown	NA	LANDRACE	NA	NA	0.002	0.001	0.004	0.991	0.002
1356	6	65	Saint_Paul_Field_2014	PI55526	6-row	Commune A	COLLECTED	Tunisia	NA	LANDRACE	32.589	9.395	0.465	0.003	0.099	0.429	0.004
1357	6	64	Saint_Paul_Field_2014	CIho2547	6-row	Orzo Nudo di Altamura 1921	DEVELOPED	Italy	Apulia	BREEDING	40.658	17.562	0.569	0.132	0.011	0.284	0.004
1358	6	63	Saint_Paul_Field_2014	CIho15575	6-row	QB 136.34	DEVELOPED	Canada	Quebec	BREEDING	53.2244	-73.2696	0.005	0.007	0.005	0.739	0.244
1359	6	62	Saint_Paul_Field_2014	PI356719	6-row	MOR 12/6	COLLECTED	Morocco	NA	LANDRACE	32.405	-5.735	0.986	0.003	0.003	0.006	0.002	NAM Parent
1360	6	61	Saint_Paul_Field_2014	CIho4095	6-row	CI 4095	COLLECTED	Georgia	NA	LANDRACE	41.7167	44.7833	0.009	0.364	0.341	0.15	0.136
1361	6	60	Saint_Paul_Field_2014	PI76286	6-row	B-97	COLLECTED	Iraq	Baghdad	LANDRACE	33.3621	44.9024	0.228	0.569	0.008	0.011	0.184
1362	6	59	Saint_Paul_Field_2014	PI327716	6-row	HOR 3327	COLLECTED	Ukraine	Odesa	LANDRACE	47.4317	30.2145	0.251	0.003	0.007	0.736	0.003	NAM Parent
1363	6	58	Saint_Paul_Field_2014	PI467758	6-row	Mashu Mugi	DEVELOPED	Japan	Hokkaido	CULTIVAR	43.2203	142.863	0.008	0.006	0.038	0.942	0.006	NAM Parent
1364	6	57	Saint_Paul_Field_2014	PI73700	6-row	9123	COLLECTED	China	Manchuria	LANDRACE	44.6679	124.681	0.002	0.117	0.002	0.878	0.001
1365	6	56	Saint_Paul_Field_2014	PI87836	6-row	Harumaki Zarai Shu	COLLECTED	Korea, North	Pyongan Nam	LANDRACE	39.9805	125.992	0.003	0.439	0.001	0.555	0.002
1366	6	55	Saint_Paul_Field_2014	PI328728	6-row	HOR 1790	COLLECTED	Afghanistan	NA	LANDRACE	33.9491	67.72	0.001	0.992	0.002	0.002	0.003
1367	6	54	Saint_Paul_Field_2014	PI640170	6-row	TX01D164	DEVELOPED	United States	Texas	BREEDING	32.3135	-97.7735	0.07	0.069	0.167	0.683	0.012
1368	6	53	Saint_Paul_Field_2014	CIho16152	6-row	Isogenic: Powdery Mildew Sus (mla6)	DEVELOPED	United States	Maryland	GENETIC	39.0458	76.6413	0.03	0.039	0.012	0.906	0.014
1369	6	52	Saint_Paul_Field_2014	PI640342	6-row	TX01D339	DEVELOPED	United States	Texas	BREEDING	32.2897	-97.7973	0.207	0.11	0.07	0.503	0.109
1370	6	51	Saint_Paul_Field_2014	PI134636	6-row	CIho 6591	COLLECTED	Afghanistan	Kabul	LANDRACE	34.4231	69.3858	0.004	0.951	0.005	0.004	0.035
1371	6	50	Saint_Paul_Field_2014	PI640159	6-row	TX01D153	DEVELOPED	United States	Texas	BREEDING	30.2018	-98.2662	0.202	0.085	0.005	0.704	0.004
1372	6	49	Saint_Paul_Field_2014	CIho6549	6-row	CI 6549	DEVELOPED	Sweden	Malmohus	BREEDING	56.0403	13.6458	0.002	0.002	0.155	0.839	0.002
1373	6	48	Saint_Paul_Field_2014	PI71075	6-row	10247	DEVELOPED	Uzbekistan	Tashkent	BREEDING	41.2995	69.2401	0.347	0.002	0.003	0.645	0.003	NAM Parent
1374	6	47	Saint_Paul_Field_2014	PI390281	6-row	IV/1	COLLECTED	Macedonia	NA	LANDRACE	41.3397	20.6033	0.194	0.003	0.004	0.798	0.001	NAM Parent
1375	6	46	Saint_Paul_Field_2014	PI69421	6-row	6995	COLLECTED	China	Hebei	LANDRACE	NA	NA	NA	NA	NA	NA	NA	Excluded from GWAS due to high amounts of missing SNP data or heterozygosity. NAM Parent.
1376	6	45	Saint_Paul_Field_2014	PI410522	6-row	N90B	COLLECTED	Pakistan	Azad Kashmir	LANDRACE	35.3	75.7667	0.027	0.27	0.514	0.175	0.014
1377	6	44	Saint_Paul_Field_2014	CIho3240	6-row	Bahtim	COLLECTED	Egypt	NA	UNCERTAIN	30.164	28.035	0.959	0.028	0.005	0.005	0.004
1378	6	43	Saint_Paul_Field_2014	PI343713	6-row	1	COLLECTED	Saudi Arabia	NA	UNCERTAIN	24.4849	47.1562	0.263	0.36	0.023	0.004	0.351
1379	6	42	Saint_Paul_Field_2014	PI198734	6-row	CIho 9878	COLLECTED	Afghanistan	Ghazni	LANDRACE	33.5567	68.4258	0.017	0.782	0.006	0.029	0.165
1380	6	41	Saint_Paul_Field_2014	CIho4622	6-row	CI 4622	COLLECTED	Japan	NA	UNCERTAIN	36.21	138.26	0.001	0.995	0.001	0.001	0.002
1381	6	40	Saint_Paul_Field_2014	PI422225	6-row	NA	COLLECTED	Yemen	NA	LANDRACE	15.1051	44.4323	0.201	0.014	0.053	0.518	0.214
1382	6	39	Saint_Paul_Field_2014	PI119925	6-row	Cebada Paraguay	COLLECTED	Paraguay	Asuncion	UNCERTAIN	-25.2667	-57.6667	0.979	0.003	0.005	0.008	0.004	NAM Parent
1383	6	38	Saint_Paul_Field_2014	PI61342	6-row	CIho 3199	DEVELOPED	Japan	Hokkaido	BREEDING	NA	NA	NA	NA	NA	NA	NA	Excluded from GWAS due to high amounts of missing SNP data or heterozygosity.
1384	6	37	Saint_Paul_Field_2014	CIho15290	6-row	Djebali	COLLECTED	Tunisia	Bizerte	LANDRACE	36.4711	10.2795	0.763	0.09	0.006	0.025	0.117
1385	6	36	Saint_Paul_Field_2014	PI592797	6-row	AC Stacey	DEVELOPED	Canada	Alberta	CULTIVAR	54.1838	-116.381	0.344	0.002	0.208	0.443	0.004
1386	6	35	Saint_Paul_Field_2014	PI402401	2-row	MCU 3923	COLLECTED	Colombia	Cundinamarca	UNCERTAIN	5.32086	-74.4768	0.42	0.002	0.372	0.204	0.003	NAM Parent
1387	6	34	Saint_Paul_Field_2014	PI392492	2-row	Welgevallen 62-13-86	DEVELOPED	South Africa	Cape Province	BREEDING	-32.042	23.764	0.398	0.002	0.594	0.004	0.002
1388	6	33	Saint_Paul_Field_2014	PI296188	2-row	Narodnyj 9	DEVELOPED	Russian Federation	Krasnodar	CULTIVAR	45.0393	38.9872	0.129	0.266	0.255	0.247	0.103
1389	6	32	Saint_Paul_Field_2014	PI205639	2-row	Pelileo	COLLECTED	Ecuador	Pichincha	CULTIVAR	-0.14648	-78.4752	0.345	0.002	0.292	0.358	0.003	Did not flower. Replaced by another line in 2015.
1390	6	31	Saint_Paul_Field_2014	PI362203	2-row	Legia	DEVELOPED	Belgium	Namur	CULTIVAR	50.494	4.873	0.035	0.003	0.832	0.119	0.012	NAM Parent
1391	6	30	Saint_Paul_Field_2014	PI392423	2-row	Welgevallen 65-56-20	DEVELOPED	South Africa	Cape Province	BREEDING	-32.803	21.523	0.009	0.003	0.779	0.203	0.006	NAM Parent
1392	6	29	Saint_Paul_Field_2014	PI321854	2-row	Zagreb 48	DEVELOPED	Croatia	NA	CULTIVAR	45.027	14.687	0.042	0.003	0.611	0.342	0.002	NAM Parent
1393	6	28	Saint_Paul_Field_2014	PI382343	2-row	GAW 86-2	COLLECTED	Ethiopia	Tigre	LANDRACE	12.8663	39.4147	0.002	0.002	0.003	0.002	0.992
1394	6	27	Saint_Paul_Field_2014	CIho15616	2-row	LT 74G6	DEVELOPED	Canada	Quebec	BREEDING	51.798	-73.147	0.014	0.001	0.981	0.003	0.001
1395	6	26	Saint_Paul_Field_2014	PI135761	2-row	4753	COLLECTED	Afghanistan	Ghowr	LANDRACE	34.55	65.15	0.12	0.522	0.18	0.011	0.167
1396	6	25	Saint_Paul_Field_2014	PI643283	2-row	ND14701	DEVELOPED	United States	North Dakota	BREEDING	47.522	-100.575	0.004	0.002	0.539	0.414	0.041	NAM Parent
1397	6	24	Saint_Paul_Field_2014	PI371111	2-row	1101BB	COLLECTED	Switzerland	Valais	LANDRACE	46.4359	7.185	0.01	0.008	0.581	0.391	0.01
1398	6	23	Saint_Paul_Field_2014	PI614939	2-row	Heris	DEVELOPED	Czech Republic	South Moravia	CULTIVAR	48.994	16.847	0.036	0.06	0.819	0.004	0.08	Secondary Check 1
1399	6	22	Saint_Paul_Field_2014	PI592172	2-row	Donan	DEVELOPED	United Kingdom	Scotland	CULTIVAR	57.405	-3.762	0.002	0.001	0.973	0.002	0.023
1400	6	21	Saint_Paul_Field_2014	PI392407	2-row	Welgevallen 60-12-49	DEVELOPED	South Africa	Cape Province	BREEDING	-32.71	22.116	0.28	0.002	0.705	0.006	0.008	NAM Parent
1401	6	20	Saint_Paul_Field_2014	PI296457	2-row	H-2180	COLLECTED	Ethiopia	Tigre	LANDRACE	14.2	39.4167	0.002	0.001	0.002	0.002	0.994
1402	6	19	Saint_Paul_Field_2014	PI371490	2-row	2134B	COLLECTED	Switzerland	Graubunden	LANDRACE	47.1029	8.88716	0.005	0.003	0.44	0.547	0.006	NAM Parent
1403	6	18	Saint_Paul_Field_2014	PI467836	2-row	Lubuski	DEVELOPED	Poland	NA	CULTIVAR	53.499	17.306	0.002	0.001	0.987	0.007	0.002
1404	6	17	Saint_Paul_Field_2014	CIho16671	2-row	Isogenic: 2-Row Small Lateral Club Head	DEVELOPED	United States	Montana	GENETIC	46.9666	-109.938	0.395	0.008	0.374	0.213	0.009
1405	6	16	Saint_Paul_Field_2014	CIho2224	2-row	CI 2224	DEVELOPED	United States	Minnesota	BREEDING	45.34	-93.31	0.005	0.161	0.004	0.293	0.537
1406	6	15	Saint_Paul_Field_2014	PI573610	2-row	WIR 4697	COLLECTED	Armenia	NA	LANDRACE	40.0691	45.0382	0.13	0.306	0.343	0.136	0.085
1407	6	14	Saint_Paul_Field_2014	PI548107	2-row	MFB 104	DEVELOPED	Hungary	Budapest	CULTIVAR	47.467	19.356	0.001	0.001	0.995	0.001	0.001
1408	6	13	Saint_Paul_Field_2014	PI467847	2-row	FM 434	DEVELOPED	Brazil	Rio Grande do Sul	CULTIVAR	-30.119	-50.913	0.118	0.004	0.841	0.019	0.018
1409	6	12	Saint_Paul_Field_2014	PI320227	2-row	Early Challenger	COLLECTED	Australia	Western Australia	UNCERTAIN	-16.0921	127.684	0.459	0.002	0.533	0.004	0.002	NAM Parent
1410	6	11	Saint_Paul_Field_2014	PI392458	2-row	Welgevallen 60-1-19	DEVELOPED	South Africa	Cape Province	BREEDING	-32.303	18.733	0.275	0.002	0.7	0.02	0.003
1411	6	10	Saint_Paul_Field_2014	PI371172	2-row	1282B	COLLECTED	Switzerland	Valais	LANDRACE	46.4145	7.13304	0.038	0.2	0.287	0.472	0.003
1412	6	9	Saint_Paul_Field_2014	PI392499	2-row	Welgevallen 65-56-21	DEVELOPED	South Africa	Cape Province	BREEDING	NA	NA	NA	NA	NA	NA	NA	Excluded from GWAS due to high amounts of missing SNP data or heterozygosity.
1413	6	8	Saint_Paul_Field_2014	PI592173	2-row	Doubloon	DEVELOPED	United Kingdom	Wales	CULTIVAR	51.887	-4.386	0.009	0.004	0.979	0.004	0.004	NAM Parent
1414	6	7	Saint_Paul_Field_2014	PI467749	2-row	Menuet	DEVELOPED	Netherlands	NA	CULTIVAR	53.027	6.098	0.007	0.003	0.973	0.003	0.014	NAM Parent
1415	6	6	Saint_Paul_Field_2014	PI429313	2-row	NA	COLLECTED	Yemen	NA	LANDRACE	15.5167	43.9	0.22	0.011	0.029	0.012	0.727
1416	6	5	Saint_Paul_Field_2014	PI414409	2-row	Minskij	DEVELOPED	Belarus	Minsk	CULTIVAR	53.9045	27.5615	0.001	0.001	0.995	0.002	0.001	NAM Parent
1417	6	4	Saint_Paul_Field_2014	CIho9143	2-row	CI 9143	COLLECTED	Austria	NA	UNCERTAIN	48.453	16.31	0.003	0.002	0.889	0.105	0.001
1418	6	3	Saint_Paul_Field_2014	PI183598	2-row	Otterbacher	DEVELOPED	Austria	NA	CULTIVAR	48.051	14.904	0.002	0.01	0.922	0.063	0.002
1419	6	2	Saint_Paul_Field_2014	PI548760	2-row	HOR 4469	COLLECTED	Syria	Dar 'a	UNCERTAIN	32.6167	36.1	0.545	0.145	0.058	0.031	0.222
1420	6	1	Saint_Paul_Field_2014	PI467519	2-row	Gabelstorfer Barden	DEVELOPED	Germany	NA	CULTIVAR	50.501	11.41	0.012	0.007	0.785	0.194	0.002
1421	7	1	Saint_Paul_Field_2014	PI467364	2-row	Refsum	DEVELOPED	Norway	NA	CULTIVAR	61.605	10.985	0.059	0.003	0.544	0.386	0.008
1422	7	2	Saint_Paul_Field_2014	PI182662	2-row	Bikai	COLLECTED	Lebanon	El Beqaa	LANDRACE	33.7619	35.8803	0.381	0.244	0.177	0.013	0.185
1423	7	3	Saint_Paul_Field_2014	PI584962	2-row	Mi Mai 114	COLLECTED	China	Zhejiang	LANDRACE	28.6904	119.977	0.013	0.359	0.475	0.147	0.006	Secondary Check 2
1424	7	4	Saint_Paul_Field_2014	PI447051	2-row	NA	DEVELOPED	Spain	Zaragoza	BREEDING	41.6701	-1.19396	0.649	0.006	0.327	0.009	0.009
1425	7	5	Saint_Paul_Field_2014	PI296996	2-row	B.273-0-15-001	DEVELOPED	Argentina	Buenos Aires	BREEDING	34.6037	58.3816	0.093	0.678	0.217	0.006	0.006
1426	7	6	Saint_Paul_Field_2014	PI328835	2-row	Hatvani 308	DEVELOPED	Hungary	Heves	CULTIVAR	47.225	19.6843	0.002	0.001	0.992	0.003	0.002	NAM Parent
1427	7	7	Saint_Paul_Field_2014	PI573663	2-row	SN-33	COLLECTED	Georgia	NA	LANDRACE	43.0911	42.917	0.08	0.469	0.31	0.02	0.12
1428	7	8	Saint_Paul_Field_2014	PI467808	2-row	Perfekta	DEVELOPED	Austria	NA	CULTIVAR	47.251	14.387	0.002	0.001	0.992	0.002	0.003
1429	7	9	Saint_Paul_Field_2014	PI591926	2-row	Arapiles	DEVELOPED	Australia	Victoria	CULTIVAR	-36.921	142.994	0.121	0.005	0.858	0.013	0.003
1430	7	10	Saint_Paul_Field_2014	PI436153	2-row	338	COLLECTED	Chile	Los Lagos	LANDRACE	-40.8	-73.1833	0.002	0.002	0.992	0.002	0.002
1431	7	11	Saint_Paul_Field_2014	PI436149	2-row	242	COLLECTED	Chile	La Araucania	LANDRACE	-38.7	-73.2833	0.001	0.001	0.995	0.001	0.001	NAM Parent
1432	7	12	Saint_Paul_Field_2014	PI283441	2-row	C.P.I. 15700	COLLECTED	Ethiopia	NA	LANDRACE	9.495	40.8397	0.069	0.026	0.021	0.006	0.878
1433	7	13	Saint_Paul_Field_2014	PI611472	2-row	Martonvasari 50	DEVELOPED	Hungary	Budapest	CULTIVAR	47.496	18.893	0.277	0.139	0.104	0.007	0.473
1434	7	14	Saint_Paul_Field_2014	PI611576	2-row	Prevenets	DEVELOPED	Ukraine	NA	CULTIVAR	46.308	32.404	0.017	0.059	0.701	0.167	0.055
1435	7	15	Saint_Paul_Field_2014	PI486152	2-row	Kyle	COLLECTED	Zimbabwe	NA	CULTIVAR	-19.832	30.345	0.069	0.002	0.921	0.003	0.005	NAM Parent
1436	7	16	Saint_Paul_Field_2014	PI643369	2-row	ND23117	DEVELOPED	United States	North Dakota	BREEDING	48.0406	-100.778	0.069	0.012	0.497	0.368	0.054
1437	7	17	Saint_Paul_Field_2014	PI498440	2-row	Weka	DEVELOPED	New Zealand	NA	CULTIVAR	-43.795	171.288	0.006	0.001	0.987	0.005	0.001
1438	7	18	Saint_Paul_Field_2014	PI226639	2-row	14728	COLLECTED	Iran	Fars	LANDRACE	29.6333	51.7333	0.199	0.353	0.299	0.009	0.14
1439	7	19	Saint_Paul_Field_2014	PI392520	2-row	Welgevallen 60-19-59	DEVELOPED	South Africa	Cape Province	BREEDING	-28.6167	21.396	0.647	0.012	0.323	0.016	0.002
1440	7	20	Saint_Paul_Field_2014	PI304912	2-row	Esperance	COLLECTED	Morocco	NA	CULTIVAR	31.9698	-7.34508	0.506	0.225	0.046	0.017	0.207
1441	7	21	Saint_Paul_Field_2014	PI346387	2-row	Malteria Heda	DEVELOPED	Argentina	Buenos Aires	CULTIVAR	-35.089	-58.01	0.107	0.002	0.881	0.003	0.006	NAM Parent
1442	7	22	Saint_Paul_Field_2014	PI643242	2-row	ND7159	DEVELOPED	United States	North Dakota	BREEDING	47.3024	-101.365	0.002	0.003	0.625	0.357	0.013
1443	7	23	Saint_Paul_Field_2014	CIho16658	2-row	Isogenic: 2-Row Large Lateral Late	DEVELOPED	United States	Montana	GENETIC	46.6904	-110.689	0.457	0.007	0.407	0.118	0.011
1444	7	24	Saint_Paul_Field_2014	PI382437	2-row	GAW 138-3	COLLECTED	Ethiopia	Shewa	LANDRACE	8.41667	39.3833	0.002	0.002	0.003	0.002	0.991
1445	7	25	Saint_Paul_Field_2014	PI361671	2-row	Long Glumes	COLLECTED	Denmark	NA	UNCERTAIN	55.8778	9.73126	0.116	0.218	0.54	0.016	0.11
1446	7	26	Saint_Paul_Field_2014	PI428497	2-row	Roxane	DEVELOPED	France	Yvelines	CULTIVAR	48.537	1.214	0.065	0.002	0.902	0.021	0.01
1447	7	27	Saint_Paul_Field_2014	PI290743	2-row	Kenya Research	DEVELOPED	Kenya	Rift Valley	CULTIVAR	-0.066	35.278	0.24	0.001	0.746	0.011	0.002
1448	7	28	Saint_Paul_Field_2014	PI592271	2-row	Coronet	DEVELOPED	United Kingdom	England	CULTIVAR	52.6976	-1.95669	0.005	0.002	0.933	0.002	0.057
1449	7	29	Saint_Paul_Field_2014	PI296998	2-row	B.273-0-26-00a3	DEVELOPED	Argentina	Buenos Aires	BREEDING	35.0968	58.8747	0.181	0.645	0.165	0.006	0.003
1450	7	30	Saint_Paul_Field_2014	PI330399	2-row	Jantar	DEVELOPED	Czech Republic	East Bohemia	CULTIVAR	50.12	16.51	0.001	0.001	0.996	0.001	0.001
1451	7	31	Saint_Paul_Field_2014	PI285118	2-row	S-36	COLLECTED	Eritrea	NA	LANDRACE	16.582	38.727	0.025	0.002	0.955	0.014	0.003	NAM Parent
1452	7	32	Saint_Paul_Field_2014	PI57015	2-row	FLE No. B68	COLLECTED	Iraq	NA	LANDRACE	33.23	43.69	0.253	0.302	0.226	0.022	0.198	NAM Parent
1453	7	33	Saint_Paul_Field_2014	PI436140	2-row	66	COLLECTED	Chile	La Araucania	LANDRACE	-38.9667	-72.7167	0.002	0.001	0.994	0.002	0.001
1454	7	34	Saint_Paul_Field_2014	CIho6371	2-row	S.D. 1344	DEVELOPED	United States	South Dakota	BREEDING	43.9695	-99.9018	0.028	0.034	0.615	0.317	0.007
1455	7	35	Saint_Paul_Field_2014	PI182645	2-row	Hakata No. 2	DEVELOPED	Japan	Fukuoka	CULTIVAR	33.5904	130.402	0.162	0.001	0.696	0.139	0.002
1456	7	36	Saint_Paul_Field_2014	PI330513	6-row	Coeleste	DONATED	United Kingdom	England	UNCERTAIN	52.8449	-1.14906	0.044	0.373	0.004	0.575	0.003
1457	7	37	Saint_Paul_Field_2014	PI467352	6-row	Bjorneby	DEVELOPED	Norway	NA	CULTIVAR	60.472	8.4689	0.002	0.001	0.004	0.992	0.001
1458	7	38	Saint_Paul_Field_2014	PI264906	6-row	503	COLLECTED	Greece	Aegean Islands	LANDRACE	36.1833	27.8333	0.951	0.015	0.003	0.011	0.021
1459	7	39	Saint_Paul_Field_2014	CIho7153	6-row	36Ab2568	DEVELOPED	United States	Idaho	BREEDING	44.5327	-115.093	0.43	0.022	0.409	0.134	0.004	Secondary Check 1
1460	7	40	Saint_Paul_Field_2014	CIho15593	6-row	QB 139.7	DEVELOPED	Canada	Quebec	BREEDING	53.1981	-73.2958	0.01	0.012	0.004	0.763	0.212
1461	7	41	Saint_Paul_Field_2014	PI564500	6-row	Valluno	DEVELOPED	Bolivia	NA	CULTIVAR	-15.71	-64.77	0.001	0.001	0.001	0.001	0.996
1462	7	42	Saint_Paul_Field_2014	CIho10034	6-row	Herse	DEVELOPED	Norway	NA	CULTIVAR	NA	NA	NA	NA	NA	NA	NA	Excluded from GWAS due to high amounts of missing SNP data or heterozygosity. NAM Parent.
1463	7	43	Saint_Paul_Field_2014	PI270687	6-row	89	COLLECTED	Peru	Puno	LANDRACE	-16.2639	-70.38	0.888	0.031	0.006	0.069	0.006
1464	7	44	Saint_Paul_Field_2014	PI356580	6-row	E 508/3	COLLECTED	Ethiopia	NA	LANDRACE	9.395	40.7397	0.003	0.001	0.001	0.001	0.994
1465	7	45	Saint_Paul_Field_2014	PI383136	6-row	GAW 141-2	COLLECTED	Ethiopia	Shewa	LANDRACE	8.28333	39.4167	0.001	0.001	0.001	0.001	0.996
1466	7	46	Saint_Paul_Field_2014	PI640154	6-row	TX01D148	DEVELOPED	United States	Texas	BREEDING	31.6108	-99.6295	0.439	0.107	0.021	0.429	0.003
1467	7	47	Saint_Paul_Field_2014	PI320217	6-row	C.P.I. 28364	COLLECTED	Australia	Western Australia	UNCERTAIN	-15.5591	127.322	0.964	0.014	0.004	0.004	0.014	NAM Parent
1468	7	48	Saint_Paul_Field_2014	PI290346	6-row	Abessinische 6 Zlg	COLLECTED	Ethiopia	NA	LANDRACE	8.0351	41.58	0.121	0.004	0.014	0.656	0.205
1469	7	49	Saint_Paul_Field_2014	PI402101	6-row	MCU 3623	COLLECTED	Colombia	Cundinamarca	UNCERTAIN	5.49137	-74.1924	0.343	0.002	0.097	0.555	0.003
1470	7	50	Saint_Paul_Field_2014	PI402416	6-row	MCU 3938	COLLECTED	Colombia	Cundinamarca	UNCERTAIN	4.96935	-73.7491	0.322	0.002	0.011	0.664	0.002
1471	7	51	Saint_Paul_Field_2014	PI129466	6-row	10345 Z Mandzurji	COLLECTED	Soviet Union	Former	BREEDING	61.55	105.35	0.001	0.994	0.001	0.002	0.001
1472	7	52	Saint_Paul_Field_2014	PI328486	6-row	HOR 1131	COLLECTED	Greece	Crete	LANDRACE	35.4667	23.7833	0.981	0.003	0.003	0.004	0.01
1473	7	53	Saint_Paul_Field_2014	PI220659	6-row	335	COLLECTED	Afghanistan	Parwan	LANDRACE	34.9833	68.7333	0.052	0.626	0.224	0.008	0.09
1474	7	54	Saint_Paul_Field_2014	PI640376	6-row	TX01D373	DEVELOPED	United States	Texas	BREEDING	30.2377	-98.2303	0.256	0.019	0.004	0.706	0.015	NAM Parent
1475	7	55	Saint_Paul_Field_2014	CIho11788	6-row	Harar	COLLECTED	Ethiopia	Harer	UNCERTAIN	9.5	41.5	0.136	0.002	0.311	0.158	0.393
1476	7	56	Saint_Paul_Field_2014	CIho15349	6-row	Jebali	COLLECTED	Tunisia	Kebili	LANDRACE	NA	NA	NA	NA	NA	NA	NA	Excluded from GWAS due to high amounts of missing SNP data or heterozygosity. NAM Parent.
1477	7	57	Saint_Paul_Field_2014	PI289811	6-row	32b	COLLECTED	Iran	Khuzestan	LANDRACE	32.1942	48.2436	0.108	0.742	0.029	0.045	0.075
1478	7	58	Saint_Paul_Field_2014	PI584867	6-row	Escourgeon de Vendee	DEVELOPED	France	NA	CULTIVAR	47.876	1.092	0.432	0.002	0.164	0.4	0.002
1479	7	59	Saint_Paul_Field_2014	CIho7247	6-row	B120-247-8	DEVELOPED	United States	Utah	BREEDING	39.291	-110.868	0.754	0.014	0.036	0.189	0.007	NAM Parent
1480	7	60	Saint_Paul_Field_2014	PI331803	6-row	HOR 142	COLLECTED	India	NA	LANDRACE	22.844	74.986	0.004	0.074	0.009	0.909	0.005
1481	7	61	Saint_Paul_Field_2014	PI264213	6-row	Saida 183	COLLECTED	Algeria	NA	CULTIVAR	35.83	1.6	0.952	0.002	0.009	0.033	0.004
1482	7	62	Saint_Paul_Field_2014	PI129482	6-row	Oziery	COLLECTED	Poland	Krakow	UNCERTAIN	49.9428	19.5349	0.405	0.001	0.003	0.589	0.002	NAM Parent
1483	7	63	Saint_Paul_Field_2014	PI29004	6-row	Turkestan	COLLECTED	Turkmenistan	Mary	LANDRACE	37.6307	62.2474	0.002	0.992	0.002	0.002	0.002
1484	7	64	Saint_Paul_Field_2014	PI182726	6-row	10382	COLLECTED	Turkey	Kars	LANDRACE	39.9333	44.0333	0.113	0.63	0.145	0.008	0.104
1485	7	65	Saint_Paul_Field_2014	PI327860	6-row	HOR 4182	COLLECTED	Turkmenistan	NA	LANDRACE	39.1671	59.3986	0.002	0.99	0.002	0.005	0.002
1486	7	66	Saint_Paul_Field_2014	PI295960	6-row	NB 5	COLLECTED	Israel	NA	CULTIVAR	32.3995	35.2106	0.814	0.14	0.021	0.022	0.004
1487	7	67	Saint_Paul_Field_2014	PI401964	6-row	MCU 3486	COLLECTED	Colombia	Cundinamarca	UNCERTAIN	5.32491	-74.4913	0.346	0.002	0.006	0.644	0.002	NAM Parent
1488	7	68	Saint_Paul_Field_2014	PI327617	6-row	Hatvani 445	DEVELOPED	Hungary	Heves	CULTIVAR	47.8058	20.2039	0.16	0.003	0.091	0.743	0.003
1489	7	69	Saint_Paul_Field_2014	CIho14881	6-row	ELS 6402-467	COLLECTED	Eritrea	Asmara	LANDRACE	15.1128	38.8746	0.003	0.029	0.003	0.468	0.498	NAM Parent
1490	7	70	Saint_Paul_Field_2014	PI135758	6-row	Jao Charpalu	COLLECTED	Afghanistan	Sar-e Pol	LANDRACE	35.9489	66.42	0.002	0.992	0.001	0.001	0.003	NAM Parent
1491	8	70	Saint_Paul_Field_2014	CIho14260	6-row	6067	COLLECTED	Afghanistan	Herat	LANDRACE	33.3036	62.14	0.004	0.972	0.003	0.002	0.019
1492	8	69	Saint_Paul_Field_2014	CIho4188	6-row	6089	COLLECTED	Afghanistan	Kabul	LANDRACE	NA	NA	NA	NA	NA	NA	NA	Excluded from GWAS due to high amounts of missing SNP data or heterozygosity.
1493	8	68	Saint_Paul_Field_2014	Rasmussen	6-row	Rasmussen	DEVELOPED	United States	Minnesota	CULTIVAR	NA	NA	NA	NA	NA	NA	NA	Primary Check
1494	8	67	Saint_Paul_Field_2014	PI270722	6-row	124	COLLECTED	Peru	Puno	LANDRACE	-16.3212	-69.9515	0.994	0.001	0.001	0.001	0.002
1495	8	66	Saint_Paul_Field_2014	CIho13651	6-row	H-2127	DEVELOPED	Israel	NA	BREEDING	31.664	35.287	0.935	0.009	0.041	0.009	0.005
1496	8	65	Saint_Paul_Field_2014	CIho3388	6-row	Carre 48	COLLECTED	Algeria	NA	UNCERTAIN	31.63	1.65	0.975	0.003	0.003	0.014	0.005
1497	8	64	Saint_Paul_Field_2014	CIho2367	6-row	Khartum	COLLECTED	Sudan	Khartoum	UNCERTAIN	15.6618	32.8711	0.994	0.001	0.001	0.002	0.001	NAM Parent
1498	8	63	Saint_Paul_Field_2014	Rasmussen	6-row	Rasmussen	DEVELOPED	United States	Minnesota	CULTIVAR	NA	NA	NA	NA	NA	NA	NA	Primary Check
1499	8	62	Saint_Paul_Field_2014	PI467815	6-row	Etu	DEVELOPED	Finland	NA	CULTIVAR	64.2519	28.076	0.002	0.002	0.373	0.622	0.001
1500	8	61	Saint_Paul_Field_2014	PI371156	6-row	1265G	COLLECTED	Switzerland	Valais	LANDRACE	46.4004	7.74518	0.014	0.003	0.346	0.633	0.004
1501	8	60	Saint_Paul_Field_2014	PI285124	6-row	S-42	COLLECTED	Ethiopia	Shewa	LANDRACE	9.68333	39.5333	0.001	0.001	0.001	0.001	0.997
1502	8	59	Saint_Paul_Field_2014	PI361687	6-row	Jadar	DEVELOPED	Norway	NA	CULTIVAR	60.772	8.7689	0.016	0.008	0.041	0.912	0.023
1503	8	58	Saint_Paul_Field_2014	Rasmussen	6-row	Rasmussen	DEVELOPED	United States	Minnesota	CULTIVAR	NA	NA	NA	NA	NA	NA	NA	Primary Check
1504	8	57	Saint_Paul_Field_2014	PI156654	6-row	Chervonec	DEVELOPED	Russian Federation	Irkutsk	CULTIVAR	52.287	104.305	0.002	0.002	0.004	0.99	0.002
1505	8	56	Saint_Paul_Field_2014	PI292018	6-row	Nissanith	DEVELOPED	Israel	NA	CULTIVAR	NA	NA	NA	NA	NA	NA	NA	Excluded from GWAS due to high amounts of missing SNP data or heterozygosity.
1506	8	55	Saint_Paul_Field_2014	PI356715	6-row	MOR 12/2	COLLECTED	Morocco	NA	LANDRACE	31.8968	6.75669	0.001	0.001	0.001	0.001	0.995
1507	8	54	Saint_Paul_Field_2014	PI366450	6-row	383	COLLECTED	Afghanistan	Badghis	LANDRACE	34.8667	63.0833	0.002	0.987	0.002	0.001	0.007
1508	8	53	Saint_Paul_Field_2014	Rasmussen	6-row	Rasmussen	DEVELOPED	United States	Minnesota	CULTIVAR	NA	NA	NA	NA	NA	NA	NA	Primary Check
1509	8	52	Saint_Paul_Field_2014	PI640340	6-row	TX01D337	DEVELOPED	United States	Texas	BREEDING	31.9051	-99.7834	0.052	0.239	0.111	0.586	0.012
1510	8	51	Saint_Paul_Field_2014	PI565786	6-row	Hua Chuan Pi 4 Hao	COLLECTED	China	Heilongjiang	CULTIVATED	48	128	0.01	0.013	0.006	0.966	0.005
1511	8	50	Saint_Paul_Field_2014	PI264912	6-row	663	COLLECTED	Greece	Macedonia	LANDRACE	40.2667	23.4333	0.735	0.009	0.005	0.248	0.002
1512	8	49	Saint_Paul_Field_2014	CIho5058	6-row	Sentinel	COLLECTED	Australia	New South Wales	UNCERTAIN	-32.5787	145.932	0.353	0.003	0.399	0.243	0.002
1513	8	48	Saint_Paul_Field_2014	Rasmussen	6-row	Rasmussen	DEVELOPED	United States	Minnesota	CULTIVAR	NA	NA	NA	NA	NA	NA	NA	Primary Check
1514	8	47	Saint_Paul_Field_2014	PI296460	6-row	H-2227	COLLECTED	Eritrea	Senhit	LANDRACE	15.7778	38.4581	0.008	0.005	0.004	0.005	0.978	NAM Parent
1515	8	46	Saint_Paul_Field_2014	PI640343	6-row	TX01D340	DEVELOPED	United States	Texas	BREEDING	30.07	-98.398	0.018	0.086	0.016	0.872	0.008
1516	8	45	Saint_Paul_Field_2014	PI61589	6-row	4077	COLLECTED	Mongolia	NA	LANDRACE	47.1176	104.102	0.001	0.995	0.001	0.001	0.001
1517	8	44	Saint_Paul_Field_2014	PI434741	6-row	QB 702.1	DEVELOPED	Canada	Quebec	BREEDING	53.0197	-73.4742	0.004	0.004	0.003	0.987	0.002
1518	8	43	Saint_Paul_Field_2014	Rasmussen	6-row	Rasmussen	DEVELOPED	United States	Minnesota	CULTIVAR	NA	NA	NA	NA	NA	NA	NA	Primary Check
1519	8	42	Saint_Paul_Field_2014	PI383031	6-row	GAW 99-4	COLLECTED	Ethiopia	Shewa	LANDRACE	8.68333	38.2333	0.001	0.001	0.001	0.001	0.996
1520	8	41	Saint_Paul_Field_2014	PI244791	6-row	5035	COLLECTED	Afghanistan	Parwan	LANDRACE	35.0161	69.1747	0.002	0.988	0.003	0.003	0.004
1521	8	40	Saint_Paul_Field_2014	PI331895	6-row	HOR 1850	COLLECTED	Afghanistan	NA	LANDRACE	33.94	67.72	0.039	0.68	0.255	0.007	0.02
1522	8	39	Saint_Paul_Field_2014	PI129491	6-row	Nr. 14	COLLECTED	Tunisia	NA	UNCERTAIN	33.638	9.527	0.736	0.001	0.004	0.257	0.002
1523	8	38	Saint_Paul_Field_2014	Rasmussen	6-row	Rasmussen	DEVELOPED	United States	Minnesota	CULTIVAR	NA	NA	NA	NA	NA	NA	NA	Primary Check
1524	8	37	Saint_Paul_Field_2014	PI640161	6-row	TX01D155	DEVELOPED	United States	Texas	BREEDING	30.5685	-97.8995	0.136	0.07	0.051	0.736	0.008
1525	8	36	Saint_Paul_Field_2014	PI447191	6-row	NA	COLLECTED	Spain	NA	UNCERTAIN	38.737	-5.285	0.97	0.005	0.01	0.011	0.003
1526	8	35	Saint_Paul_Field_2014	PI643361	2-row	ND22170	DEVELOPED	United States	North Dakota	BREEDING	47.5994	-101.357	0.054	0.004	0.438	0.497	0.007
1527	8	34	Saint_Paul_Field_2014	PI573617	2-row	Abava	DEVELOPED	Latvia	NA	CULTIVAR	57.022	24.835	0.002	0.002	0.81	0.183	0.003
1528	8	33	Saint_Paul_Field_2014	Conlon	2-row	Conlon	DEVELOPED	United States	North Dakota	CULTIVAR	NA	NA	NA	NA	NA	NA	NA	Primary Check
1529	8	32	Saint_Paul_Field_2014	PI592169	2-row	Regent	DEVELOPED	United Kingdom	Wales	CULTIVAR	52.165	-4.21	0.037	0.003	0.936	0.003	0.021
1530	8	31	Saint_Paul_Field_2014	PI313113	2-row	Europa	DEVELOPED	Germany	Baden-Wurttemberg	CULTIVAR	48.604	9.408	0.002	0.004	0.982	0.003	0.01
1531	8	30	Saint_Paul_Field_2014	PI485524	2-row	Cerise	DEVELOPED	United Kingdom	England	CULTIVAR	53.005	-0.792	0.143	0.002	0.825	0.006	0.024
1532	8	29	Saint_Paul_Field_2014	PI316801	2-row	HOR 2541	COLLECTED	Ethiopia	NA	LANDRACE	9.4	39.58	0.001	0.003	0.002	0.002	0.992
1533	8	28	Saint_Paul_Field_2014	Conlon	2-row	Conlon	DEVELOPED	United States	North Dakota	CULTIVAR	NA	NA	NA	NA	NA	NA	NA	Primary Check
1534	8	27	Saint_Paul_Field_2014	PI342139	2-row	2407	COLLECTED	Turkey	Usak	LANDRACE	38.5	29.4167	0.262	0.01	0.251	0.255	0.222	NAM Parent
1535	8	26	Saint_Paul_Field_2014	PI392448	2-row	Welgevallen 65-41-7	DEVELOPED	South Africa	Cape Province	BREEDING	-31.968	20.798	0.25	0.053	0.687	0.005	0.004
1536	8	25	Saint_Paul_Field_2014	PI129477	2-row	Miejscowy z Podkarpacia	COLLECTED	Poland	Krakow	UNCERTAIN	50.2281	19.5376	0.067	0.361	0.007	0.561	0.005
1537	8	24	Saint_Paul_Field_2014	PI573668	2-row	SN-71	COLLECTED	Georgia	NA	LANDRACE	43.4333	43.1016	0.122	0.484	0.275	0.02	0.098
1538	8	23	Saint_Paul_Field_2014	Conlon	2-row	Conlon	DEVELOPED	United States	North Dakota	CULTIVAR	NA	NA	NA	NA	NA	NA	NA	Primary Check
1539	8	22	Saint_Paul_Field_2014	PI285084	2-row	Astrid	DEVELOPED	France	Nord	CULTIVAR	50.156	2.629	0.01	0.002	0.938	0.049	0.001
1540	8	21	Saint_Paul_Field_2014	PI573661	2-row	AR 9610/82	COLLECTED	Georgia	NA	LANDRACE	43.0333	42.8333	0.064	0.405	0.256	0.129	0.146
1541	8	20	Saint_Paul_Field_2014	PI614939	2-row	Heris	DEVELOPED	Czech Republic	South Moravia	CULTIVAR	48.994	16.847	0.036	0.06	0.819	0.004	0.08
1542	8	19	Saint_Paul_Field_2014	PI506293	2-row	Teo	DEVELOPED	United Kingdom	England	CULTIVAR	52.312	-2.858	0.073	0.002	0.921	0.003	0.002
1543	8	18	Saint_Paul_Field_2014	Conlon	2-row	Conlon	DEVELOPED	United States	North Dakota	CULTIVAR	NA	NA	NA	NA	NA	NA	NA	Primary Check
1544	8	17	Saint_Paul_Field_2014	PI584803	2-row	Birgitta	DEVELOPED	Sweden	Malmohus	CULTIVAR	NA	NA	NA	NA	NA	NA	NA	Excluded from GWAS due to high amounts of missing SNP data or heterozygosity.
1545	8	16	Saint_Paul_Field_2014	PI347750	2-row	CIho 15007	DEVELOPED	France	Puy-de-Dome	BREEDING	45.734	3.129	0.051	0.011	0.918	0.003	0.017	NAM Parent
1546	8	15	Saint_Paul_Field_2014	PI344729	2-row	68-28295	DEVELOPED	Argentina	Buenos Aires	BREEDING	-34.787	-59.065	0.139	0.002	0.854	0.003	0.002
1547	8	14	Saint_Paul_Field_2014	PI223130	2-row	Arabi	COLLECTED	Jordan	NA	UNCERTAIN	30.59	36.24	0.449	0.161	0.163	0.018	0.209
1548	8	13	Saint_Paul_Field_2014	Conlon	2-row	Conlon	DEVELOPED	United States	North Dakota	CULTIVAR	NA	NA	NA	NA	NA	NA	NA	Primary Check
1549	8	12	Saint_Paul_Field_2014	PI337145	2-row	Magnif 132	DEVELOPED	Argentina	Buenos Aires	CULTIVAR	-35.318	-57.439	0.328	0.031	0.63	0.004	0.006
1550	8	11	Saint_Paul_Field_2014	PI643364	2-row	ND22895	DEVELOPED	United States	North Dakota	BREEDING	47.6156	-101.444	0.004	0.003	0.564	0.427	0.002
1551	8	10	Saint_Paul_Field_2014	PI506302	2-row	RPB 715-69	DEVELOPED	United Kingdom	England	BREEDING	52.727	-1.517	0.13	0.002	0.862	0.003	0.003	NAM Parent
1552	8	9	Saint_Paul_Field_2014	PI345615	2-row	Kombajner	DEVELOPED	Latvia	NA	CULTIVAR	57.284	22.781	0.002	0.002	0.824	0.169	0.003
1553	8	8	Saint_Paul_Field_2014	Conlon	2-row	Conlon	DEVELOPED	United States	North Dakota	CULTIVAR	NA	NA	NA	NA	NA	NA	NA	Primary Check
1554	8	7	Saint_Paul_Field_2014	PI290234	2-row	Hatvani 45/25	DEVELOPED	Hungary	Heves	CULTIVAR	47.8245	20.2049	0.02	0.159	0.42	0.394	0.007
1555	8	6	Saint_Paul_Field_2014	PI467846	2-row	Antarctica 04	DEVELOPED	Brazil	NA	CULTIVAR	-7.579	-52.26	0.008	0.006	0.76	0.224	0.001
1556	8	5	Saint_Paul_Field_2014	PI285636	2-row	Refleks	DEVELOPED	Poland	NA	CULTIVAR	53.052	22.843	0.002	0.002	0.988	0.006	0.002	NAM Parent
1557	8	4	Saint_Paul_Field_2014	PI250861	2-row	K1679	COLLECTED	Iran	Khorasan	LANDRACE	36.3	59.6	0.189	0.333	0.265	0.005	0.208
1558	8	3	Saint_Paul_Field_2014	Conlon	2-row	Conlon	DEVELOPED	United States	North Dakota	CULTIVAR	NA	NA	NA	NA	NA	NA	NA	Primary Check
1559	8	2	Saint_Paul_Field_2014	PI422233	2-row	NA	COLLECTED	Yemen	Bir Al Gahum	LANDRACE	15.4184	44.0468	0.003	0.006	0.536	0.447	0.008	NAM Parent
1560	8	1	Saint_Paul_Field_2014	PI573702	2-row	SN-2701	COLLECTED	Georgia	NA	LANDRACE	41.9472	44.7375	0.226	0.371	0.272	0.009	0.121
1561	9	1	Saint_Paul_Field_2014	PI592167	2-row	Tay	DEVELOPED	United Kingdom	Scotland	CULTIVAR	56.736	-3.179	0.002	0.001	0.936	0.06	0.001
1562	9	2	Saint_Paul_Field_2014	PI614939	2-row	Heris	DEVELOPED	Czech Republic	South Moravia	CULTIVAR	48.994	16.847	0.036	0.06	0.819	0.004	0.08	Secondary Check 1
1563	9	3	Saint_Paul_Field_2014	PI57095	2-row	CIho 3347	COLLECTED	Georgia	NA	LANDRACE	42.6848	43.7263	0.041	0.089	0.637	0.175	0.058
1564	9	4	Saint_Paul_Field_2014	PI573594	2-row	Auksiniaj 3	DEVELOPED	Lithuania	NA	CULTIVAR	55.918	22.202	0.115	0.079	0.724	0.057	0.025
1565	9	5	Saint_Paul_Field_2014	PI643232	2-row	ND5021-3	DEVELOPED	United States	North Dakota	BREEDING	47.2837	-101.281	0.023	0.005	0.659	0.31	0.004
1566	9	6	Saint_Paul_Field_2014	PI371392	2-row	2004E	COLLECTED	Switzerland	Graubunden	LANDRACE	NA	NA	NA	NA	NA	NA	NA	Excluded from GWAS due to high amounts of missing SNP data or heterozygosity.
1567	9	7	Saint_Paul_Field_2014	CIho3694	2-row	90b	COLLECTED	Egypt	Red Sea	LANDRACE	26.0667	34.1	0.514	0.232	0.054	0.015	0.184
1568	9	8	Saint_Paul_Field_2014	PI467851	2-row	FM 438	DEVELOPED	Brazil	Rio Grande do Sul	CULTIVAR	-28.732	-54.671	0.003	0.002	0.766	0.227	0.001	NAM Parent
1569	9	9	Saint_Paul_Field_2014	PI195318	2-row	2725	COLLECTED	Guatemala	Totonicapan	LANDRACE	14.9167	-91.3667	0.499	0.433	0.01	0.011	0.048
1570	9	10	Saint_Paul_Field_2014	CIho11794	2-row	L93	COLLECTED	Netherlands	NA	UNCERTAIN	51.813	5.64	0.028	0.023	0.005	0.006	0.938
1571	9	11	Saint_Paul_Field_2014	PI342283	2-row	2560	COLLECTED	Turkey	Kutahya	LANDRACE	38.8739	29.7797	0.086	0.138	0.533	0.132	0.11	NAM Parent
1572	9	12	Saint_Paul_Field_2014	PI297408	2-row	Delta	DEVELOPED	Netherlands	South Holland	CULTIVAR	51.5741	4.76436	0.024	0.005	0.938	0.011	0.023
1573	9	13	Saint_Paul_Field_2014	PI296453	2-row	H-2170	COLLECTED	Eritrea	Asmara	LANDRACE	15.6431	39.0886	0.003	0.002	0.003	0.004	0.988
1574	9	14	Saint_Paul_Field_2014	PI605472	2-row	Garnet	DEVELOPED	United States	Idaho	CULTIVAR	44.253	-114.315	0.005	0.002	0.955	0.035	0.003
1575	9	15	Saint_Paul_Field_2014	PI531901	2-row	1415	COLLECTED	Egypt	NA	UNCERTAIN	26.6336	30.4539	0.419	0.082	0.377	0.003	0.119
1576	9	16	Saint_Paul_Field_2014	PI566574	2-row	E Liang 3040	COLLECTED	China	Hubei	CULTIVATED	31	112	0.037	0.003	0.627	0.329	0.004
1577	9	17	Saint_Paul_Field_2014	PI643362	2-row	ND22182	DEVELOPED	United States	North Dakota	BREEDING	47.6485	-101.434	0.041	0.039	0.509	0.408	0.003
1578	9	18	Saint_Paul_Field_2014	PI643368	2-row	ND22996	DEVELOPED	United States	North Dakota	BREEDING	47.6963	-100.885	0.002	0.003	0.524	0.466	0.004
1579	9	19	Saint_Paul_Field_2014	PI643314	2-row	ND17470	DEVELOPED	United States	North Dakota	BREEDING	47.5976	-101	0.029	0.007	0.484	0.361	0.12
1580	9	20	Saint_Paul_Field_2014	PI371100	2-row	1065B	COLLECTED	Switzerland	Valais	LANDRACE	46.2987	7.86778	0.017	0.013	0.626	0.319	0.025
1581	9	21	Saint_Paul_Field_2014	PI371105	2-row	1083A	COLLECTED	Switzerland	Valais	LANDRACE	46.3833	8.08333	0.005	0.026	0.572	0.386	0.01
1582	9	22	Saint_Paul_Field_2014	PI342331	2-row	2608	COLLECTED	Turkey	Kutahya	LANDRACE	38.7519	29.2733	0.008	0.14	0.59	0.182	0.08	NAM Parent
1583	9	23	Saint_Paul_Field_2014	PI392501	2-row	Welgevallen 65-31-36	DEVELOPED	South Africa	Cape Province	BREEDING	-28.6113	21.9403	0.42	0.003	0.565	0.01	0.002
1584	9	24	Saint_Paul_Field_2014	PI371217	2-row	1340C	COLLECTED	Switzerland	Valais	LANDRACE	46.1667	7.8	0.02	0.017	0.644	0.314	0.006
1585	9	25	Saint_Paul_Field_2014	PI294734	2-row	Brunneinudum	COLLECTED	Bulgaria	NA	UNCERTAIN	42.728	24.877	0.008	0.023	0.008	0.015	0.947
1586	9	26	Saint_Paul_Field_2014	PI643322	2-row	ND18380-1	DEVELOPED	United States	North Dakota	BREEDING	47.5208	-100.576	0.005	0.033	0.447	0.504	0.011
1587	9	27	Saint_Paul_Field_2014	PI564461	2-row	Krassi	COLLECTED	Bulgaria	Plovdiv	CULTIVAR	42.0133	24.5035	0.042	0.003	0.657	0.286	0.013
1588	9	28	Saint_Paul_Field_2014	CIho11588	2-row	Israel 264	COLLECTED	Israel	NA	CULTIVAR	30.8638	34.4927	0.574	0.248	0.014	0.017	0.146	NAM Parent
1589	9	29	Saint_Paul_Field_2014	PI94790	2-row	308	COLLECTED	Georgia	NA	LANDRACE	42.4748	43.5163	0.16	0.116	0.38	0.179	0.165	NAM Parent
1590	9	30	Saint_Paul_Field_2014	PI414084	2-row	Criolla Negra	COLLECTED	Bolivia	NA	UNCERTAIN	-17.899	-63.896	0.001	0.002	0.001	0.001	0.994
1591	9	31	Saint_Paul_Field_2014	PI296472	2-row	H-2183	COLLECTED	Ethiopia	NA	LANDRACE	10.68	41.71	0.001	0.001	0.001	0.002	0.995	NAM Parent
1592	9	32	Saint_Paul_Field_2014	PI573611	2-row	WIR 25662	COLLECTED	Cameroon	NA	UNCERTAIN	NA	NA	NA	NA	NA	NA	NA	Excluded from GWAS due to high amounts of missing SNP data or heterozygosity. NAM Parent.
1593	9	33	Saint_Paul_Field_2014	PI296995	2-row	B.273-0-15-000	DEVELOPED	Argentina	Buenos Aires	BREEDING	35.0063	58.7842	0.188	0.628	0.177	0.004	0.003
1594	9	34	Saint_Paul_Field_2014	PI643288	2-row	ND15079	DEVELOPED	United States	North Dakota	BREEDING	47.4598	-100.559	0.031	0.009	0.523	0.378	0.059
1595	9	35	Saint_Paul_Field_2014	PI371102	2-row	1069B	COLLECTED	Switzerland	Valais	LANDRACE	46.717	7.86668	0.064	0.169	0.368	0.395	0.004
1596	9	36	Saint_Paul_Field_2014	PI329000	6-row	S 3192	COLLECTED	Ethiopia	NA	LANDRACE	5.02	38.702	0.001	0.001	0.001	0.005	0.991	NAM Parent
1597	9	37	Saint_Paul_Field_2014	PI327860	6-row	HOR 4182	COLLECTED	Turkmenistan	NA	LANDRACE	39.1671	59.3986	0.002	0.99	0.002	0.005	0.002	Secondary Check 2
1598	9	38	Saint_Paul_Field_2014	CIho16516	6-row	Isogenic: rr White Aleurone	DEVELOPED	United States	Montana	GENETIC	46.667	-109.35	0.045	0.016	0.041	0.895	0.003
1599	9	39	Saint_Paul_Field_2014	PI640167	6-row	TX01D161	DEVELOPED	United States	Texas	BREEDING	30.6305	-97.8375	0.128	0.035	0.061	0.766	0.009
1600	9	40	Saint_Paul_Field_2014	CIho2542	6-row	Bari	COLLECTED	Italy	Apulia	CULTIVAR	41.25	16.25	0.803	0.01	0.005	0.165	0.018	NAM Parent
1601	9	41	Saint_Paul_Field_2014	CIho6020	6-row	Success	COLLECTED	Australia	New South Wales	UNCERTAIN	-33.0525	145.665	0.992	0.002	0.001	0.004	0.001	NAM Parent
1602	9	42	Saint_Paul_Field_2014	PI640034	6-row	TX02D222	DEVELOPED	United States	Texas	BREEDING	32.4916	-97.5954	0.033	0.114	0.105	0.719	0.029
1603	9	43	Saint_Paul_Field_2014	PI237571	6-row	II-373-1B-4B-1T-1-13B	DEVELOPED	Colombia	Cundinamarca	BREEDING	5.0277	-73.8149	0.306	0.003	0.249	0.441	0.002
1604	9	44	Saint_Paul_Field_2014	PI270645	6-row	47	COLLECTED	Peru	Puno	LANDRACE	-15.9098	-69.9236	0.994	0.002	0.001	0.001	0.001
1605	9	45	Saint_Paul_Field_2014	CIho14807	6-row	Freak	DEVELOPED	United States	Idaho	GENETIC	NA	NA	NA	NA	NA	NA	NA	Excluded from all analyses. Intermediate? One plant 6-row but the rest were 2-row/intermediate. Categorized as 2-row in GrainGenes and as 6-row in GRIN and Muñoz-Amatriaín et al. 2014.
1606	9	46	Saint_Paul_Field_2014	PI467797	6-row	Attiki	DEVELOPED	Greece	Macedonia	CULTIVAR	41.6916	22.2445	0.911	0.039	0.007	0.038	0.004
1607	9	47	Saint_Paul_Field_2014	CIho6546	6-row	Tystofte	DEVELOPED	Denmark	NA	CULTIVAR	55.9941	9.1901	0.002	0.001	0.005	0.988	0.004
1608	9	48	Saint_Paul_Field_2014	PI401963	6-row	MCU 3485	COLLECTED	Colombia	Cundinamarca	UNCERTAIN	5.36014	-74.5451	0.408	0.003	0.004	0.377	0.207
1609	9	49	Saint_Paul_Field_2014	PI452311	6-row	STB 19	DEVELOPED	United Kingdom	England	BREEDING	53.164	-0.375	0.668	0.13	0.185	0.007	0.01	Did not flower. Replaced by another line in 2015.
1610	9	50	Saint_Paul_Field_2014	PI438585	2-row	W-C 2440	COLLECTED	Guatemala	Guatemala	LANDRACE	14.6333	-90.5167	0.536	0.427	0.011	0.007	0.019	Planted with 6-row lines but looked 2-row in field. Categorized as 6-row in GrainGenes and Muñoz-Amatriaín et al. 2014, but categorized as 2-row in GRIN.
1611	9	51	Saint_Paul_Field_2014	PI640100	6-row	TX02D321	DEVELOPED	United States	Texas	BREEDING	32.4243	-97.6627	0.166	0.125	0.018	0.624	0.067
1612	9	52	Saint_Paul_Field_2014	CIho14222	6-row	4062	COLLECTED	Mongolia	NA	LANDRACE	47.1622	104.146	0.002	0.982	0.002	0.002	0.012
1613	9	53	Saint_Paul_Field_2014	PI188831	6-row	Edda II	DEVELOPED	Sweden	Malmohus	CULTIVAR	55.9903	13.5958	0.002	0.002	0.002	0.98	0.013
1614	9	54	Saint_Paul_Field_2014	PI329042	6-row	HOR 1027	COLLECTED	Greece	Peloponnese	LANDRACE	37.15	21.9667	0.94	0.023	0.01	0.004	0.022
1615	9	55	Saint_Paul_Field_2014	CIho14258	6-row	6065	COLLECTED	Afghanistan	Nimruz	LANDRACE	30.5	62	0.055	0.932	0.003	0.006	0.004	NAM Parent
1616	9	56	Saint_Paul_Field_2014	CIho6091	6-row	C.A.N. 1098	DEVELOPED	Canada	Ontario	BREEDING	51.3038	85.3732	0.006	0.113	0.013	0.862	0.005
1617	9	57	Saint_Paul_Field_2014	CIho14239	6-row	4055	COLLECTED	Mongolia	NA	LANDRACE	46.9125	103.897	0.001	0.995	0.001	0.001	0.001
1618	9	58	Saint_Paul_Field_2014	PI61576	6-row	3926	COLLECTED	Mongolia	NA	LANDRACE	47.2721	104.256	0.002	0.994	0.001	0.001	0.001
1619	9	59	Saint_Paul_Field_2014	CIho5057	6-row	Malebo	DEVELOPED	Australia	New South Wales	CULTIVAR	31.2532	146.921	0.13	0.837	0.02	0.007	0.006
1620	9	60	Saint_Paul_Field_2014	PI525185	6-row	Arra	DEVELOPED	Finland	NA	CULTIVAR	62.0131	26.0808	0.002	0.001	0.002	0.994	0.001
1621	9	61	Saint_Paul_Field_2014	CIho7265	6-row	Comtesse	DEVELOPED	France	Yvelines	CULTIVAR	48.867	1.758	0.001	0.001	0.002	0.994	0.001
1622	9	62	Saint_Paul_Field_2014	PI401939	6-row	MCU 3461	COLLECTED	Colombia	Cundinamarca	UNCERTAIN	4.59421	-74.2214	0.335	0.002	0.006	0.46	0.197
1623	9	63	Saint_Paul_Field_2014	PI87840	6-row	Borinor	COLLECTED	Korea, North	Pyongan Nam	LANDRACE	39.9746	126.2	0.003	0.268	0.003	0.724	0.002
1624	9	64	Saint_Paul_Field_2014	PI584886	6-row	Motan	DEVELOPED	France	Herault	CULTIVAR	43.5912	3.25836	0.53	0.008	0.269	0.189	0.005
1625	9	65	Saint_Paul_Field_2014	PI194952	6-row	9244	COLLECTED	Ethiopia	Gonder	LANDRACE	13.076	37.88	0.001	0.001	0.001	0.001	0.995
1626	9	66	Saint_Paul_Field_2014	CIho4184	6-row	Abi Jou	COLLECTED	Afghanistan	Takhar	LANDRACE	35.7344	69.5392	0.001	0.992	0.004	0.002	0.001	NAM Parent
1627	9	67	Saint_Paul_Field_2014	PI629116	6-row	Reliance	DEVELOPED	United States	Montana	CULTIVAR	47.1951	-110.329	0.227	0.183	0.137	0.344	0.109
1628	9	68	Saint_Paul_Field_2014	PI467737	6-row	Apam	DEVELOPED	Mexico	Federal District	CULTIVAR	19.4826	-99.1832	0.17	0.006	0.098	0.724	0.002
1629	9	69	Saint_Paul_Field_2014	CIho15594	6-row	QB 139.8	DEVELOPED	Canada	Quebec	BREEDING	53.1305	-73.3634	0.026	0.011	0.003	0.788	0.171
1630	9	70	Saint_Paul_Field_2014	CIho2236	6-row	Reids Triumph	COLLECTED	United States	Idaho	UNCERTAIN	45.0183	-114.643	0.003	0.003	0.367	0.625	0.002
1631	10	70	Saint_Paul_Field_2014	PI415014	6-row	Puebla	DEVELOPED	Mexico	Federal District	CULTIVAR	19.6404	-99.0892	0.487	0.002	0.078	0.381	0.052
1632	10	69	Saint_Paul_Field_2014	PI328577	6-row	HOR 1253	COLLECTED	Greece	Peloponnese	LANDRACE	36.5736	22.8727	0.982	0.005	0.004	0.005	0.003	NAM Parent
1633	10	68	Saint_Paul_Field_2014	PI328484	6-row	HOR 1129	COLLECTED	Greece	Crete	LANDRACE	35.1667	25	0.962	0.018	0.014	0.003	0.004
1634	10	67	Saint_Paul_Field_2014	PI370970	6-row	696C	COLLECTED	Switzerland	Valais	LANDRACE	46.4167	8.16667	0.058	0.342	0.023	0.567	0.009
1635	10	66	Saint_Paul_Field_2014	PI182625	6-row	Baitori No. 1	DEVELOPED	Japan	Kyoto	CULTIVAR	35.02	135.77	0.001	0.996	0.001	0.001	0.002
1636	10	65	Saint_Paul_Field_2014	PI467732	6-row	Tunga	DEVELOPED	Norway	NA	CULTIVAR	60.822	8.8189	0.003	0.002	0.149	0.844	0.002
1637	10	64	Saint_Paul_Field_2014	PI182684	6-row	Khashabi	COLLECTED	Syria	Hims	LANDRACE	34.7333	36.7167	0.866	0.007	0.013	0.107	0.006
1638	10	63	Saint_Paul_Field_2014	CIho15362	6-row	Jebali	COLLECTED	Tunisia	Bizerte	LANDRACE	NA	NA	NA	NA	NA	NA	NA	Excluded from GWAS due to high amounts of missing SNP data or heterozygosity. NAM Parent.
1639	10	62	Saint_Paul_Field_2014	PI344874	6-row	15	COLLECTED	Macedonia	NA	LANDRACE	41.8	20.9	0.119	0.006	0.004	0.866	0.006
1640	10	61	Saint_Paul_Field_2014	PI640286	6-row	TX01D283	DEVELOPED	United States	Texas	BREEDING	NA	NA	NA	NA	NA	NA	NA	Excluded from GWAS due to high amounts of missing SNP data or heterozygosity. NAM Parent.
1641	10	60	Saint_Paul_Field_2014	PI76284	6-row	B-87	COLLECTED	Iraq	Baghdad	LANDRACE	33.4443	44.1423	0.167	0.655	0.01	0.007	0.161
1642	10	59	Saint_Paul_Field_2014	CIho2205	6-row	Sangatsuko	COLLECTED	Japan	NA	UNCERTAIN	36.19	138.23	0.001	0.996	0.001	0.001	0.001	NAM Parent
1643	10	58	Saint_Paul_Field_2014	PI290322	6-row	Hatvani 445	DEVELOPED	Hungary	Heves	CULTIVAR	47.7258	20.1239	0.143	0.003	0.241	0.611	0.002
1644	10	57	Saint_Paul_Field_2014	CIho10260	6-row	Iwate Selection	COLLECTED	Japan	NA	BREEDING	36.2048	138.253	0.103	0.38	0.003	0.511	0.002
1645	10	56	Saint_Paul_Field_2014	PI387098	6-row	IAR/B/328-3	COLLECTED	Ethiopia	Shewa	LANDRACE	8.91667	38.65	0.001	0.001	0.001	0.001	0.996	NAM Parent
1646	10	55	Saint_Paul_Field_2014	PI57752	6-row	Good Delta	COLLECTED	Egypt	Sharqiya	LANDRACE	30.8	31.8	0.628	0.241	0.005	0.003	0.123
1647	10	54	Saint_Paul_Field_2014	CIho14055	6-row	38	COLLECTED	Algeria	NA	LANDRACE	33.0167	6.01667	0.684	0.032	0.021	0.241	0.022
1648	10	53	Saint_Paul_Field_2014	PI237580	6-row	Surprise-II-750-3B-1B-1-7T	DEVELOPED	Colombia	Cundinamarca	BREEDING	5.07145	-74.1946	0.495	0.002	0.263	0.239	0.002
1649	10	52	Saint_Paul_Field_2014	PI371817	6-row	Ablyn	DEVELOPED	Australia	New South Wales	CULTIVAR	-31.04	148.97	0.796	0.059	0.137	0.004	0.004	NAM Parent
1650	10	51	Saint_Paul_Field_2014	PI87780	6-row	Hadaka Mugi	COLLECTED	Korea, North	Pyongan Nam	LANDRACE	39.6304	126.859	0.001	0.843	0.002	0.151	0.003
1651	10	50	Saint_Paul_Field_2014	PI467684	6-row	4235	COLLECTED	Portugal	Coimbra	LANDRACE	40.0333	-8.38333	0.947	0.004	0.011	0.033	0.006
1652	10	49	Saint_Paul_Field_2014	PI54915	6-row	Donnes	COLLECTED	Norway	Nordland	LANDRACE	66.2	12.5833	0.001	0.996	0.001	0.001	0.001	NAM Parent
1653	10	48	Saint_Paul_Field_2014	PI87800	6-row	Makishu	COLLECTED	Korea, South	Kyongsang Puk	LANDRACE	36.3333	128.75	0.002	0.517	0.002	0.477	0.001
1654	10	47	Saint_Paul_Field_2014	PI532000	6-row	2744	COLLECTED	Egypt	NA	UNCERTAIN	26.5851	30.3567	0.533	0.188	0.006	0.004	0.268
1655	10	46	Saint_Paul_Field_2014	PI95278	6-row	485/1989	COLLECTED	Unknown	NA	LANDRACE	NA	NA	0.001	0.001	0.001	0.001	0.997
1656	10	45	Saint_Paul_Field_2014	PI640346	6-row	TX01D343	DEVELOPED	United States	Texas	BREEDING	30.6143	-97.8537	0.061	0.203	0.005	0.729	0.003
1657	10	44	Saint_Paul_Field_2014	PI362207	6-row	Mars	DEVELOPED	France	Yvelines	CULTIVAR	48.7851	1.82565	0.51	0.004	0.118	0.35	0.018	NAM Parent
1658	10	43	Saint_Paul_Field_2014	CIho7153	6-row	36Ab2568	DEVELOPED	United States	Idaho	BREEDING	44.5327	-115.093	0.43	0.022	0.409	0.134	0.004
1659	10	42	Saint_Paul_Field_2014	PI76285	6-row	B-94	COLLECTED	Iraq	Baghdad	LANDRACE	33.6534	44.1913	0.189	0.591	0.034	0.024	0.161
1660	10	41	Saint_Paul_Field_2014	PI57089	6-row	CIho 3230	COLLECTED	China	Hubei	LANDRACE	30.5833	114.317	0.002	0.988	0.003	0.003	0.003	NAM Parent
1661	10	40	Saint_Paul_Field_2014	PI386650	6-row	IAR/B/239-1	COLLECTED	Ethiopia	Gonder	LANDRACE	13.15	37.9	0.001	0.001	0.001	0.001	0.997	NAM Parent
1662	10	39	Saint_Paul_Field_2014	PI295956	6-row	BT Hazera 127/1	COLLECTED	Israel	NA	BREEDING	31.317	34.321	0.868	0.064	0.016	0.022	0.029
1663	10	38	Saint_Paul_Field_2014	PI449279	6-row	3997	DEVELOPED	Spain	Zaragoza	BREEDING	41.7088	-0.704016	0.353	0.002	0.365	0.278	0.002	NAM Parent
1664	10	37	Saint_Paul_Field_2014	CIho13743	6-row	CI 13743	COLLECTED	Eritrea	Asmara	LANDRACE	15.3399	39.4055	0.001	0.001	0.001	0.001	0.996	NAM Parent
1665	10	36	Saint_Paul_Field_2014	CIho14319	6-row	CI 14319	DONATED	Denmark	Storstrom	UNCERTAIN	54.988	11.885	0.002	0.001	0.006	0.99	0.001	NAM Parent
1666	10	35	Saint_Paul_Field_2014	PI382506	2-row	GAW 71-16	COLLECTED	Ethiopia	Tigre	LANDRACE	14.4073	38.9534	0.001	0.001	0.001	0.001	0.996
1667	10	34	Saint_Paul_Field_2014	PI592276	2-row	Fusilier	DEVELOPED	United Kingdom	England	CULTIVAR	52.607	-1.539	0.234	0.002	0.689	0.073	0.002
1668	10	33	Saint_Paul_Field_2014	CIho14250	2-row	Duab	COLLECTED	Afghanistan	Badakhshan	LANDRACE	36.8469	70.5319	0.121	0.498	0.21	0.01	0.162	NAM Parent
1669	10	32	Saint_Paul_Field_2014	PI436136	2-row	17	COLLECTED	Chile	La Araucania	LANDRACE	-38.6667	-72.4833	0.012	0.007	0.931	0.047	0.003	NAM Parent
1670	10	31	Saint_Paul_Field_2014	PI346390	2-row	Mutant ERT 1A	DEVELOPED	Argentina	Buenos Aires	BREEDING	-34.612	-58.389	0.095	0.002	0.895	0.004	0.004
1671	10	30	Saint_Paul_Field_2014	PI498435	6-row	Makomako	DEVELOPED	New Zealand	NA	CULTIVAR	-44.079	169.222	0.054	0.003	0.839	0.099	0.006	Excluded from all analyses. Planted with 2-row lines but looked 6-row in field. Categorized as 2-row in all databases.
1672	10	29	Saint_Paul_Field_2014	PI584962	2-row	Mi Mai 114	COLLECTED	China	Zhejiang	LANDRACE	28.6904	119.977	0.013	0.359	0.475	0.147	0.006
1673	10	28	Saint_Paul_Field_2014	PI295442	2-row	ELS 6302-74	COLLECTED	Ethiopia	Shewa	LANDRACE	9.35	38.7667	0.001	0.001	0.001	0.001	0.997
1674	10	27	Saint_Paul_Field_2014	PI371298	2-row	1928D	COLLECTED	Switzerland	Valais	LANDRACE	46.0037	6.99651	0.003	0.002	0.566	0.422	0.006
1675	10	26	Saint_Paul_Field_2014	PI283389	2-row	C.P.I. 13551	COLLECTED	Norway	NA	UNCERTAIN	60.914	10.216	0.002	0.012	0.938	0.046	0.002
1676	10	25	Saint_Paul_Field_2014	PI643310	2-row	ND17274	DEVELOPED	United States	North Dakota	BREEDING	47.3222	-100.699	0.004	0.005	0.601	0.373	0.017
1677	10	24	Saint_Paul_Field_2014	PI361609	2-row	Nue Grosse	COLLECTED	Denmark	NA	UNCERTAIN	56.2898	9.81111	0.052	0.731	0.113	0.032	0.072	NAM Parent
1678	10	23	Saint_Paul_Field_2014	PI253313	2-row	17485	COLLECTED	Bosnia and Herzegovina	NA	LANDRACE	44.4158	17.0861	0.004	0.006	0.836	0.152	0.002
1679	10	22	Saint_Paul_Field_2014	PI371248	2-row	1809A	COLLECTED	Switzerland	Graubunden	LANDRACE	46.7333	9.4	0.003	0.047	0.514	0.414	0.021	NAM Parent
1680	10	21	Saint_Paul_Field_2014	PI328015	2-row	Thigina 2621	DEVELOPED	Romania	NA	CULTIVAR	45.9432	24.9668	0.002	0.001	0.992	0.003	0.002	NAM Parent
1681	10	20	Saint_Paul_Field_2014	PI411030	6-row	Akyurek 32	DEVELOPED	Turkey	Ankara	BREEDING	39.947	32.871	0.267	0.094	0.009	0.626	0.003	Looks 6-row in field. Categorized as 2-row in GrainGenes and Muñoz-Amatriaín et al. 2014. Categorized as 6-row in GRIN.
1682	10	19	Saint_Paul_Field_2014	PI151787	2-row	Abyssinian 12	COLLECTED	Ethiopia	NA	LANDRACE	8.47	37.34	0.001	0.001	0.001	0.001	0.995
1683	10	18	Saint_Paul_Field_2014	PI57099	2-row	CIho 3349	COLLECTED	Georgia	NA	LANDRACE	42.4169	43.4584	0.023	0.411	0.437	0.013	0.116	NAM Parent
1684	10	17	Saint_Paul_Field_2014	PI392469	2-row	Welgevallen 65-5-4	DEVELOPED	South Africa	Cape Province	BREEDING	-34.213	21.106	0.518	0.044	0.432	0.004	0.002
1685	10	16	Saint_Paul_Field_2014	PI283416	2-row	0-20-309	COLLECTED	Czechoslovakia	NA	UNCERTAIN	49.6112	14.8258	0.009	0.347	0.582	0.055	0.007	NAM Parent
1686	10	15	Saint_Paul_Field_2014	PI392418	2-row	Welgevallen 62-13-173	DEVELOPED	South Africa	Cape Province	BREEDING	-31.762	20.029	0.235	0.002	0.759	0.002	0.002
1687	10	14	Saint_Paul_Field_2014	PI436151	2-row	297	COLLECTED	Chile	Los Lagos	LANDRACE	-40.2667	-72.8333	0.014	0.005	0.563	0.416	0.003	NAM Parent
1688	10	13	Saint_Paul_Field_2014	PI592282	2-row	Merchant	DEVELOPED	United Kingdom	England	CULTIVAR	52.87	-0.42	0.011	0.003	0.968	0.004	0.013
1689	10	12	Saint_Paul_Field_2014	PI371477	2-row	2119D	COLLECTED	Switzerland	Graubunden	LANDRACE	46.6333	9.41667	0.003	0.003	0.506	0.479	0.008
1690	10	11	Saint_Paul_Field_2014	PI388645	2-row	Stepovyj	DEVELOPED	Ukraine	Odesa	CULTIVAR	46.454	30.532	0.007	0.002	0.934	0.05	0.008	NAM Parent
1691	10	10	Saint_Paul_Field_2014	PI599640	2-row	Heran	DEVELOPED	Czech Republic	NA	CULTIVAR	49.954	16.306	0.003	0.043	0.876	0.002	0.076
1692	10	9	Saint_Paul_Field_2014	PI186424	2-row	Deficiens d'Abyssinia	COLLECTED	Ethiopia	NA	LANDRACE	9.445	40.7897	0.004	0.007	0.004	0.005	0.979
1693	10	8	Saint_Paul_Field_2014	PI392427	2-row	Welgevallen 62-13-164	DEVELOPED	South Africa	Cape Province	BREEDING	-33.015	18.579	0.567	0.007	0.411	0.011	0.003
1694	10	7	Saint_Paul_Field_2014	PI344942	2-row	74	COLLECTED	Bosnia and Herzegovina	NA	LANDRACE	43.9766	19.4733	0.005	0.004	0.748	0.242	0.002
1695	10	6	Saint_Paul_Field_2014	CIho9562	2-row	Domen	DEVELOPED	Norway	Hedmark	CULTIVAR	60.5	11.891	0.002	0.002	0.75	0.242	0.004
1696	10	5	Saint_Paul_Field_2014	PI264251	2-row	Tokak	COLLECTED	Turkey	Ankara	LANDRACE	40.0696	32.8275	0.189	0.097	0.421	0.14	0.153	NAM Parent
1697	10	4	Saint_Paul_Field_2014	PI337144	2-row	Magnif 131	DEVELOPED	Argentina	Buenos Aires	CULTIVAR	-35.008	-59.521	0.255	0.002	0.737	0.004	0.003
1698	10	3	Saint_Paul_Field_2014	PI244041	2-row	CIho 10727	COLLECTED	Yemen	NA	LANDRACE	13.9667	44.1833	0.109	0.441	0.063	0.021	0.365
1699	10	2	Saint_Paul_Field_2014	PI392464	2-row	Welgevallen 62-13-6	DEVELOPED	South Africa	Cape Province	BREEDING	-32.581	20.051	0.241	0.002	0.753	0.002	0.002	NAM Parent
1700	10	1	Saint_Paul_Field_2014	PI436146	2-row	219	COLLECTED	Chile	La Araucania	LANDRACE	-38.7333	-73	0.001	0.001	0.996	0.001	0.001	NAM Parent
1701	11	1	Saint_Paul_Field_2014	PI467739	2-row	America	DEVELOPED	Mexico	NA	CULTIVAR	25.8	-104.45	0.317	0.025	0.025	0.063	0.571
1702	11	2	Saint_Paul_Field_2014	PI599656	2-row	NSGC 6416	COLLECTED	China	Xinjiang	UNCERTAIN	46.5667	83.6	0.006	0.013	0.972	0.004	0.006
1703	11	3	Saint_Paul_Field_2014	Conlon	2-row	Conlon	DEVELOPED	United States	North Dakota	CULTIVAR	NA	NA	NA	NA	NA	NA	NA	Primary Check
1704	11	4	Saint_Paul_Field_2014	PI643307	2-row	ND16680	DEVELOPED	United States	North Dakota	BREEDING	47.3763	-100.757	0.091	0.008	0.446	0.392	0.064
1705	11	5	Saint_Paul_Field_2014	PI344727	2-row	68-10916	DEVELOPED	Argentina	Buenos Aires	BREEDING	-34.439	-59.208	0.222	0.007	0.751	0.01	0.01
1706	11	6	Saint_Paul_Field_2014	PI283415	2-row	0-21-026	COLLECTED	Czechoslovakia	NA	UNCERTAIN	49.197	17.418	0.001	0.002	0.001	0.001	0.995
1707	11	7	Saint_Paul_Field_2014	PI548761	2-row	Jerusalem II	DEVELOPED	Israel	NA	CULTIVAR	31.1136	34.696	0.554	0.172	0.013	0.055	0.206
1708	11	8	Saint_Paul_Field_2014	Conlon	2-row	Conlon	DEVELOPED	United States	North Dakota	CULTIVAR	NA	NA	NA	NA	NA	NA	NA	Primary Check
1709	11	9	Saint_Paul_Field_2014	PI86185	2-row	39789	COLLECTED	Russian Federation	Leningrad	LANDRACE	60	32	0.163	0.444	0.256	0.014	0.122
1710	11	10	Saint_Paul_Field_2014	PI268241	2-row	No. 61	COLLECTED	Iran	Fars	LANDRACE	29.6167	52.2333	0.309	0.324	0.202	0.008	0.157
1711	11	11	Saint_Paul_Field_2014	PI294743	2-row	nudifurcatus	COLLECTED	Romania	Cluj	UNCERTAIN	46.7833	23.6167	0.01	0.465	0.286	0.019	0.22	NAM Parent
1712	11	12	Saint_Paul_Field_2014	PI584962	2-row	Mi Mai 114	COLLECTED	China	Zhejiang	LANDRACE	28.6904	119.977	0.013	0.359	0.475	0.147	0.006	Secondary Check 2
1713	11	13	Saint_Paul_Field_2014	Conlon	2-row	Conlon	DEVELOPED	United States	North Dakota	CULTIVAR	NA	NA	NA	NA	NA	NA	NA	Primary Check
1714	11	14	Saint_Paul_Field_2014	PI60679	6-row	Vagabond	COLLECTED	Egypt	Giza	LANDRACE	NA	NA	NA	NA	NA	NA	NA	Excluded from GWAS due to high amounts of missing SNP data or heterozygosity. Looks 6-row in field. Categorized as 2-row in GrainGenes and Muñoz-Amatriaín et al. 2014. Categorized as 6-row in GRIN.
1715	11	15	Saint_Paul_Field_2014	PI592196	2-row	Jem	DEVELOPED	United Kingdom	NA	CULTIVAR	54.48	-1.85	0.004	0.009	0.89	0.004	0.093
1716	11	16	Saint_Paul_Field_2014	PI349359	2-row	RPB 5	DEVELOPED	United Kingdom	England	BREEDING	52.86	-1.12	0.006	0.022	0.918	0.051	0.003
1717	11	17	Saint_Paul_Field_2014	PI330520	2-row	Nigricans	DONATED	United Kingdom	England	UNCERTAIN	52.78	-1.65	0.001	0.003	0.002	0.002	0.992
1718	11	18	Saint_Paul_Field_2014	Conlon	2-row	Conlon	DEVELOPED	United States	North Dakota	CULTIVAR	NA	NA	NA	NA	NA	NA	NA	Primary Check
1719	11	19	Saint_Paul_Field_2014	PI466726	2-row	Mona	DEVELOPED	Sweden	Malmohus	CULTIVAR	55.57	13.079	0.023	0.038	0.604	0.329	0.006
1720	11	20	Saint_Paul_Field_2014	PI386559	2-row	IAR/B/37	COLLECTED	Ethiopia	Gonder	LANDRACE	11.85	38.0167	0.001	0.001	0.002	0.001	0.996
1721	11	21	Saint_Paul_Field_2014	PI404205	2-row	Suvenir	DEVELOPED	Belarus	Minsk	CULTIVAR	53.897	27.677	0.002	0.001	0.962	0.033	0.002	NAM Parent
1722	11	22	Saint_Paul_Field_2014	PI428413	2-row	Sandra	DEVELOPED	France	Yvelines	CULTIVAR	48.86	1.717	0.395	0.002	0.396	0.203	0.004
1723	11	23	Saint_Paul_Field_2014	Conlon	2-row	Conlon	DEVELOPED	United States	North Dakota	CULTIVAR	NA	NA	NA	NA	NA	NA	NA	Primary Check
1724	11	24	Saint_Paul_Field_2014	PI506295	2-row	NRPB 80-881	DEVELOPED	United Kingdom	England	BREEDING	52.58	-3.47	0.04	0.014	0.917	0.014	0.016	NAM Parent
1725	11	25	Saint_Paul_Field_2014	PI447054	2-row	NA	DEVELOPED	Spain	Zaragoza	BREEDING	41.2398	-0.997985	0.219	0.029	0.486	0.138	0.129	NAM Parent
1726	11	26	Saint_Paul_Field_2014	PI611555	2-row	Novoomskii	DEVELOPED	Russian Federation	Omsk	CULTIVAR	54.9885	73.3242	0.014	0.141	0.449	0.316	0.08
1727	11	27	Saint_Paul_Field_2014	PI429312	2-row	NA	COLLECTED	Yemen	NA	LANDRACE	13.1678	44.1789	0.211	0.016	0.026	0.006	0.74
1728	11	28	Saint_Paul_Field_2014	Conlon	2-row	Conlon	DEVELOPED	United States	North Dakota	CULTIVAR	NA	NA	NA	NA	NA	NA	NA	Primary Check
1729	11	29	Saint_Paul_Field_2014	PI611511	2-row	Vestnik	DEVELOPED	Ukraine	Odesa	CULTIVAR	46.53	30.57	0.055	0.019	0.74	0.149	0.038
1730	11	30	Saint_Paul_Field_2014	PI369732	2-row	Har'kovskij 306	DEVELOPED	Ukraine	Kharkiv	CULTIVAR	49.9941	36.4994	0.119	0.269	0.375	0.139	0.098
1731	11	31	Saint_Paul_Field_2014	PI584855	2-row	Priver	DEVELOPED	France	NA	CULTIVAR	47.217	3.42	0.166	0.276	0.409	0.136	0.013
1732	11	32	Saint_Paul_Field_2014	PI184884	2-row	Maja	DEVELOPED	Denmark	NA	CULTIVAR	55.9842	9.86402	0.001	0.001	0.996	0.001	0.001	NAM Parent
1733	11	33	Saint_Paul_Field_2014	Conlon	2-row	Conlon	DEVELOPED	United States	North Dakota	CULTIVAR	NA	NA	NA	NA	NA	NA	NA	Primary Check
1734	11	34	Saint_Paul_Field_2014	PI182687	2-row	White Charki	COLLECTED	Syria	Hamah	LANDRACE	35.1333	36.75	0.343	0.266	0.211	0.014	0.167
1735	11	35	Saint_Paul_Field_2014	PI344936	2-row	70A	COLLECTED	Bosnia and Herzegovina	NA	LANDRACE	43.5	18.7667	0.007	0.005	0.759	0.227	0.003
1736	11	36	Saint_Paul_Field_2014	CIho14054	6-row	38	COLLECTED	Algeria	NA	LANDRACE	NA	NA	NA	NA	NA	NA	NA	Excluded from GWAS due to high amounts of missing SNP data or heterozygosity.
1737	11	37	Saint_Paul_Field_2014	PI174497	6-row	Maroccaine 0187	DEVELOPED	Morocco	NA	CULTIVAR	34.784	-4.087	0.989	0.003	0.002	0.003	0.003
1738	11	38	Saint_Paul_Field_2014	Rasmussen	6-row	Rasmussen	DEVELOPED	United States	Minnesota	CULTIVAR	NA	NA	NA	NA	NA	NA	NA	Primary Check
1739	11	39	Saint_Paul_Field_2014	CIho14052	6-row	36	COLLECTED	Algeria	Biskra	LANDRACE	34.85	5.73333	0.944	0.004	0.014	0.032	0.006	NAM Parent
1740	11	40	Saint_Paul_Field_2014	PI573615	6-row	WIR 3938	COLLECTED	Mongolia	NA	LANDRACE	46.4829	103.617	0.001	0.996	0.001	0.001	0.001	NAM Parent
1741	11	41	Saint_Paul_Field_2014	PI328976	6-row	S 139	COLLECTED	Ethiopia	NA	LANDRACE	9.145	40.4897	0.005	0.053	0.447	0.492	0.002
1742	11	42	Saint_Paul_Field_2014	PI40387	6-row	July	DEVELOPED	Denmark	NA	CULTIVAR	56.024	9.22	0.006	0.003	0.022	0.967	0.003
1743	11	43	Saint_Paul_Field_2014	Rasmussen	6-row	Rasmussen	DEVELOPED	United States	Minnesota	CULTIVAR	NA	NA	NA	NA	NA	NA	NA	Primary Check
1744	11	44	Saint_Paul_Field_2014	PI316874	6-row	S 7244	COLLECTED	Ethiopia	NA	LANDRACE	10.88	38.15	0.009	0.041	0.003	0.003	0.943
1745	11	45	Saint_Paul_Field_2014	PI327977	6-row	Bigo	DEVELOPED	Netherlands	NA	CULTIVAR	52.1152	5.25151	0.005	0.004	0.005	0.977	0.009
1746	11	46	Saint_Paul_Field_2014	PI292016	6-row	Israeli 46	DEVELOPED	Israel	NA	CULTIVAR	32.724	35.298	0.93	0.025	0.016	0.017	0.012
1747	11	47	Saint_Paul_Field_2014	CIho4144	6-row	Kaljou	COLLECTED	Afghanistan	Parwan	LANDRACE	34.9333	68.4833	0.003	0.973	0.005	0.003	0.015
1748	11	48	Saint_Paul_Field_2014	Rasmussen	6-row	Rasmussen	DEVELOPED	United States	Minnesota	CULTIVAR	NA	NA	NA	NA	NA	NA	NA	Primary Check
1749	11	49	Saint_Paul_Field_2014	PI447100	6-row	NA	COLLECTED	Spain	Zaragoza	UNCERTAIN	41.4833	-1.36667	0.926	0.002	0.013	0.053	0.006	NAM Parent
1750	11	50	Saint_Paul_Field_2014	PI361930	6-row	Cluj 100/58	DEVELOPED	Romania	Cluj	BREEDING	46.765	23.628	0.136	0.003	0.015	0.845	0.001
1751	11	51	Saint_Paul_Field_2014	PI467743	6-row	Ensenada	DEVELOPED	Mexico	NA	CULTIVAR	23.348	-102.417	0.349	0.002	0.011	0.562	0.075
1752	11	52	Saint_Paul_Field_2014	CIho14219	6-row	4042	COLLECTED	Mongolia	NA	LANDRACE	46.8625	103.847	0.001	0.995	0.001	0.001	0.001
1753	11	53	Saint_Paul_Field_2014	Rasmussen	6-row	Rasmussen	DEVELOPED	United States	Minnesota	CULTIVAR	NA	NA	NA	NA	NA	NA	NA	Primary Check
1754	11	54	Saint_Paul_Field_2014	PI415012	6-row	Centinela	DEVELOPED	Mexico	Federal District	CULTIVAR	19.5781	-99.3572	0.622	0.003	0.146	0.222	0.007
1755	11	55	Saint_Paul_Field_2014	PI402164	6-row	MCU 3686	COLLECTED	Colombia	Cundinamarca	UNCERTAIN	5.04392	-74.4405	0.079	0.01	0.007	0.9	0.004	NAM Parent
1756	11	56	Saint_Paul_Field_2014	PI327860	6-row	HOR 4182	COLLECTED	Turkmenistan	NA	LANDRACE	39.1671	59.3986	0.002	0.99	0.002	0.005	0.002	Secondary Check 2
1757	11	57	Saint_Paul_Field_2014	CIho4083	6-row	4011	COLLECTED	Mongolia	Govi-Altay	LANDRACE	46.5321	96.5009	0.003	0.98	0.005	0.004	0.008
1758	11	58	Saint_Paul_Field_2014	Rasmussen	6-row	Rasmussen	DEVELOPED	United States	Minnesota	CULTIVAR	NA	NA	NA	NA	NA	NA	NA	Primary Check
1759	11	59	Saint_Paul_Field_2014	PI268250	6-row	26	COLLECTED	Iran	Ilam	LANDRACE	32.6833	47.2667	0.283	0.495	0.014	0.008	0.199
1760	11	60	Saint_Paul_Field_2014	CIho2339	6-row	B-71	COLLECTED	Iraq	NA	LANDRACE	NA	NA	NA	NA	NA	NA	NA	Excluded from GWAS due to high amounts of missing SNP data or heterozygosity.
1761	11	61	Saint_Paul_Field_2014	PI566497	6-row	Lu Quan 5 Hao	COLLECTED	China	Yunnan	CULTIVATED	24	101	0.271	0.003	0.112	0.558	0.056
1762	11	62	Saint_Paul_Field_2014	PI356711	6-row	MOR 11/6	COLLECTED	Morocco	NA	LANDRACE	31.8417	7.1426	0.048	0.04	0.007	0.031	0.874
1763	11	63	Saint_Paul_Field_2014	Rasmussen	6-row	Rasmussen	DEVELOPED	United States	Minnesota	CULTIVAR	NA	NA	NA	NA	NA	NA	NA	Primary Check
1764	11	64	Saint_Paul_Field_2014	CIho2543	6-row	Orzo Collesano 1921	DEVELOPED	Italy	Apulia	BREEDING	40.849	17.134	0.986	0.002	0.002	0.009	0.001
1765	11	65	Saint_Paul_Field_2014	PI138698	6-row	5195	COLLECTED	Iran	Lorestan	LANDRACE	27.3167	56.2833	0.213	0.667	0.012	0.012	0.096
1766	11	66	Saint_Paul_Field_2014	PI94875	6-row	329	COLLECTED	Russian Federation	Krasnodar	LANDRACE	45.3	40.9	0.96	0.004	0.011	0.017	0.007	NAM Parent
1767	11	67	Saint_Paul_Field_2014	PI174496	6-row	Maroccaine 0139	DEVELOPED	Morocco	NA	CULTIVAR	33.9175	-6.93063	0.991	0.002	0.003	0.003	0.001
1768	11	68	Saint_Paul_Field_2014	Rasmussen	6-row	Rasmussen	DEVELOPED	United States	Minnesota	CULTIVAR	NA	NA	NA	NA	NA	NA	NA	Primary Check
1769	11	69	Saint_Paul_Field_2014	PI378224	6-row	15/72	COLLECTED	Serbia	NA	LANDRACE	43.9708	19.5675	0.173	0.005	0.004	0.815	0.003
1770	11	70	Saint_Paul_Field_2014	PI640096	6-row	TX02D313	DEVELOPED	United States	Texas	BREEDING	30.5471	-97.9209	0.244	0.085	0.003	0.666	0.002
1771	12	70	Saint_Paul_Field_2014	PI640259	6-row	TX01D256	DEVELOPED	United States	Texas	BREEDING	30.3273	-98.1407	0.238	0.003	0.003	0.754	0.002
1772	12	69	Saint_Paul_Field_2014	PI244785	6-row	5029	COLLECTED	Afghanistan	Kabul	LANDRACE	34.5167	69.1833	0.101	0.628	0.24	0.007	0.025
1773	12	68	Saint_Paul_Field_2014	PI392524	6-row	Welgevallen 62-19-2-15	DEVELOPED	South Africa	Cape Province	BREEDING	-34.304	19.908	0.734	0.002	0.257	0.005	0.002	NAM Parent
1774	12	67	Saint_Paul_Field_2014	PI42889	6-row	Saggia	COLLECTED	Sudan	Khartoum	UNCERTAIN	16.0063	32.1462	0.493	0.186	0.043	0.003	0.275
1775	12	66	Saint_Paul_Field_2014	CIho10033	6-row	Varde	DEVELOPED	Norway	NA	CULTIVAR	62.219	9.014	0.001	0.001	0.002	0.995	0.001
1776	12	65	Saint_Paul_Field_2014	PI572588	6-row	Ali	COLLECTED	China	Shaanxi	CULTIVAR	35	109	0.365	0.092	0.133	0.378	0.031
1777	12	64	Saint_Paul_Field_2014	PI640153	6-row	TX01D147	DEVELOPED	United States	Texas	BREEDING	32.3648	-97.7222	0.313	0.143	0.017	0.52	0.007
1778	12	63	Saint_Paul_Field_2014	PI231161	6-row	II-871-5B	DEVELOPED	Colombia	Cundinamarca	BREEDING	5.3653	-74.3803	0.372	0.003	0.312	0.31	0.003
1779	12	62	Saint_Paul_Field_2014	PI54916	6-row	Maskin Cyg	DEVELOPED	Norway	NA	CULTIVAR	61.178	9.981	0.002	0.001	0.003	0.991	0.002
1780	12	61	Saint_Paul_Field_2014	PI344865	6-row	6	COLLECTED	Serbia	NA	LANDRACE	43.9915	20.898	0.091	0.003	0.004	0.898	0.003
1781	12	60	Saint_Paul_Field_2014	CIho15600	6-row	QB 139.17	DEVELOPED	Canada	Quebec	BREEDING	53.0288	-73.4651	0.007	0.004	0.002	0.872	0.115	NAM Parent
1782	12	59	Saint_Paul_Field_2014	PI434814	6-row	QB 714.5	DEVELOPED	Canada	Quebec	BREEDING	53.0647	-73.4292	0.002	0.003	0.015	0.977	0.002
1783	12	58	Saint_Paul_Field_2014	PI140278	6-row	CIho 6902	COLLECTED	Afghanistan	Bamian	LANDRACE	34.8167	67.8167	0.003	0.988	0.002	0.002	0.004
1784	12	57	Saint_Paul_Field_2014	PI640292	6-row	TX01D289	DEVELOPED	United States	Texas	BREEDING	30.1554	-98.3126	0.047	0.005	0.01	0.936	0.003
1785	12	56	Saint_Paul_Field_2014	CIho7153	6-row	36Ab2568	DEVELOPED	United States	Idaho	BREEDING	44.5327	-115.093	0.43	0.022	0.409	0.134	0.004	Secondary Check 1
1786	12	55	Saint_Paul_Field_2014	PI247928	6-row	NA	COLLECTED	Cyprus	NA	LANDRACE	35.0381	33.2445	0.043	0.217	0.127	0.606	0.007
1787	12	54	Saint_Paul_Field_2014	CIho14216	6-row	4041	COLLECTED	Mongolia	NA	LANDRACE	47.3005	104.285	0.002	0.989	0.003	0.003	0.003	NAM Parent
1788	12	53	Saint_Paul_Field_2014	PI640236	6-row	TX01D232	DEVELOPED	United States	Texas	BREEDING	32.4152	-97.6718	0.32	0.134	0.002	0.541	0.003
1789	12	52	Saint_Paul_Field_2014	PI84313	6-row	261	COLLECTED	Uzbekistan	Karakalpakstan	LANDRACE	43.1667	59.6667	0.003	0.986	0.004	0.005	0.002
1790	12	51	Saint_Paul_Field_2014	CIho4050	6-row	4021	COLLECTED	Mongolia	Govi-Altay	LANDRACE	46.3745	94.7988	0.008	0.692	0.005	0.291	0.005	NAM Parent
1791	12	50	Saint_Paul_Field_2014	PI295581	6-row	ELS 6302-213	COLLECTED	Ethiopia	Shewa	LANDRACE	7.2	38.6	0.001	0.001	0.001	0.001	0.997
1792	12	49	Saint_Paul_Field_2014	PI319867	6-row	3c	COLLECTED	Turkey	NA	LANDRACE	36.63	33.05	0.002	0.001	0.002	0.002	0.994	Did not flower. Replaced by another line in 2015.
1793	12	48	Saint_Paul_Field_2014	PI382982	6-row	GAW 87-1	COLLECTED	Ethiopia	Tigre	LANDRACE	12.9503	39.2195	0.001	0.001	0.001	0.001	0.997
1794	12	47	Saint_Paul_Field_2014	PI640222	6-row	TX01D217	DEVELOPED	United States	Texas	BREEDING	32.3436	-97.7434	0.33	0.037	0.004	0.623	0.006
1795	12	46	Saint_Paul_Field_2014	PI452324	6-row	STB 32	DEVELOPED	United Kingdom	England	BREEDING	52.1369	-1.23463	0.651	0.111	0.223	0.011	0.004
1796	12	45	Saint_Paul_Field_2014	PI564456	6-row	Rojen	COLLECTED	Bulgaria	Plovdiv	CULTIVAR	41.9656	24.9766	0.399	0.01	0.005	0.582	0.003
1797	12	44	Saint_Paul_Field_2014	CIho1604	6-row	Hillsa	COLLECTED	Ethiopia	NA	LANDRACE	7.99	41.32	0.004	0.99	0.001	0.001	0.002
1798	12	43	Saint_Paul_Field_2014	CIho14228	6-row	3918	COLLECTED	Mongolia	NA	LANDRACE	47.1992	104.183	0.002	0.988	0.006	0.002	0.002	NAM Parent
1799	12	42	Saint_Paul_Field_2014	PI361695	6-row	Lapinohra	DEVELOPED	Finland	NA	CULTIVAR	62.7092	26.5333	0.002	0.002	0.019	0.975	0.003
1800	12	41	Saint_Paul_Field_2014	PI640117	6-row	TX01D108	DEVELOPED	United States	Texas	BREEDING	31.567	-100.398	0.357	0.122	0.052	0.111	0.357	NAM Parent
1801	12	40	Saint_Paul_Field_2014	PI174431	6-row	Escourgeon 1/2 Hatif des Tourettes	DEVELOPED	France	NA	CULTIVAR	46.076	2.454	0.702	0.002	0.008	0.286	0.002	NAM Parent
1802	12	39	Saint_Paul_Field_2014	PI434795	6-row	QB 709.5	DEVELOPED	Canada	Quebec	BREEDING	52.9524	-73.5415	0.003	0.005	0.077	0.909	0.006
1803	12	38	Saint_Paul_Field_2014	PI640166	6-row	TX01D160	DEVELOPED	United States	Texas	BREEDING	30.2734	-98.1946	0.098	0.009	0.026	0.858	0.008
1804	12	37	Saint_Paul_Field_2014	PI223883	6-row	Jow	COLLECTED	Afghanistan	Kondoz	LANDRACE	36.6831	69.1136	0.002	0.993	0.002	0.002	0.002	NAM Parent
1805	12	36	Saint_Paul_Field_2014	CIho15310	6-row	Djebali	COLLECTED	Tunisia	Kebili	LANDRACE	34.0159	8.45477	0.943	0.009	0.004	0.005	0.039
1806	12	35	Saint_Paul_Field_2014	PI357314	2-row	Riso 6018	DEVELOPED	Denmark	Roskilde	BREEDING	55.667	12.131	0.002	0.001	0.993	0.002	0.002	NAM Parent
1807	12	34	Saint_Paul_Field_2014	PI599621	2-row	Atlas	DEVELOPED	Czech Republic	NA	CULTIVAR	49.571	13.526	0.002	0.001	0.994	0.002	0.002	NAM Parent
1808	12	33	Saint_Paul_Field_2014	PI371056	2-row	880B	COLLECTED	Switzerland	Valais	LANDRACE	46.2513	7.31172	0.01	0.057	0.642	0.248	0.043	NAM Parent
1809	12	32	Saint_Paul_Field_2014	PI611512	2-row	Viking	DEVELOPED	Russian Federation	Kirov	CULTIVAR	57.316	48.804	0.014	0.002	0.822	0.151	0.01
1810	12	31	Saint_Paul_Field_2014	CIho13797	2-row	Fergus	DEVELOPED	Canada	Ontario	CULTIVAR	52.525	-87.078	0.012	0.001	0.984	0.002	0.001
1811	12	30	Saint_Paul_Field_2014	PI436150	2-row	250	COLLECTED	Chile	La Araucania	LANDRACE	-38.6	-72.85	0.001	0.001	0.996	0.001	0.001
1812	12	29	Saint_Paul_Field_2014	PI436154	2-row	345	COLLECTED	Chile	Los Lagos	LANDRACE	-40.8833	-73.15	0.014	0.01	0.575	0.398	0.003	NAM Parent
1813	12	28	Saint_Paul_Field_2014	PI467842	2-row	Alpha 1959	DEVELOPED	Brazil	NA	CULTIVAR	-6.183	-39.955	0.026	0.016	0.499	0.457	0.002	NAM Parent
1814	12	27	Saint_Paul_Field_2014	PI392481	2-row	Welgevallen 62-13-96	DEVELOPED	South Africa	Cape Province	BREEDING	-34.485	19.765	0.494	0.002	0.498	0.004	0.002
1815	12	26	Saint_Paul_Field_2014	PI392470	2-row	Welgevallen 65-31-61	DEVELOPED	South Africa	Cape Province	BREEDING	-33.153	20.249	0.341	0.003	0.642	0.012	0.002
1816	12	25	Saint_Paul_Field_2014	PI592188	2-row	Crescent	DEVELOPED	United Kingdom	Wales	CULTIVAR	51.6154	-3.551	0.058	0.003	0.912	0.003	0.025
1817	12	24	Saint_Paul_Field_2014	PI573662	2-row	SN-26	COLLECTED	Georgia	NA	LANDRACE	43.0544	42.8136	0.144	0.405	0.27	0.099	0.083
1818	12	23	Saint_Paul_Field_2014	PI343725	2-row	Crusader	DEVELOPED	Netherlands	Groningen	CULTIVAR	53.317	6.609	0.002	0.001	0.993	0.002	0.002
1819	12	22	Saint_Paul_Field_2014	PI370994	2-row	767A	COLLECTED	Switzerland	Valais	LANDRACE	46.4975	7.97639	0.006	0.008	0.626	0.351	0.009
1820	12	21	Saint_Paul_Field_2014	PI337143	2-row	Magnif 128	DEVELOPED	Argentina	Buenos Aires	CULTIVAR	-34.685	-58.418	0.08	0.003	0.907	0.003	0.007
1821	12	20	Saint_Paul_Field_2014	CIho13653	2-row	Kolchikum 10/30	COLLECTED	Soviet Union	Former	CULTIVAR	61.53	105.32	0.157	0.408	0.358	0.015	0.062
1822	12	19	Saint_Paul_Field_2014	PI294739	2-row	Hindu Kusch	COLLECTED	Western Asia	NA	UNCERTAIN	NA	NA	0.048	0.754	0.02	0.088	0.09
1823	12	18	Saint_Paul_Field_2014	PI183590	2-row	Angener Fruhe	COLLECTED	Austria	NA	CULTIVAR	47.2826	14.6737	0.049	0.003	0.608	0.336	0.003
1824	12	17	Saint_Paul_Field_2014	PI371338	2-row	1970BD	COLLECTED	Switzerland	Graubunden	LANDRACE	46.2155	8.96481	0.002	0.003	0.471	0.509	0.014
1825	12	16	Saint_Paul_Field_2014	PI392455	2-row	Welgevallen 65-56-80	DEVELOPED	South Africa	Cape Province	BREEDING	-28.7265	21.7546	0.209	0.031	0.707	0.035	0.019
1826	12	15	Saint_Paul_Field_2014	CIho16612	2-row	Isogenic: Normal Height Dekap	DEVELOPED	United States	Montana	GENETIC	46.88	110.35	0.091	0.143	0.686	0.019	0.06	NAM Parent
1827	12	14	Saint_Paul_Field_2014	PI599628	2-row	Horal	DEVELOPED	Slovakia	NA	CULTIVAR	48.118	18.398	0.024	0.002	0.969	0.003	0.003
1828	12	13	Saint_Paul_Field_2014	PI268158	2-row	Da Caffe	COLLECTED	Czech Republic	South Moravia	UNCERTAIN	49.1667	16.6667	0.005	0.002	0.985	0.005	0.002	NAM Parent
1829	12	12	Saint_Paul_Field_2014	PI614939	2-row	Heris	DEVELOPED	Czech Republic	South Moravia	CULTIVAR	48.994	16.847	0.036	0.06	0.819	0.004	0.08	Secondary Check 1
1830	12	11	Saint_Paul_Field_2014	PI611480	2-row	NA	COLLECTED	North Korea	NA	UNCERTAIN	38.729	125.998	0.003	0.002	0.826	0.166	0.003
1831	12	10	Saint_Paul_Field_2014	PI195320	2-row	2747	COLLECTED	Guatemala	Solola	LANDRACE	NA	NA	NA	NA	NA	NA	NA	Excluded from GWAS due to high amounts of missing SNP data or heterozygosity.
1832	12	9	Saint_Paul_Field_2014	PI643227	2-row	ND4856	DEVELOPED	United States	North Dakota	BREEDING	46.898	-100.736	0.002	0.002	0.631	0.363	0.002
1833	12	8	Saint_Paul_Field_2014	PI349907	2-row	17-23/69	COLLECTED	Bosnia and Herzegovina	NA	LANDRACE	43.7614	19.4617	0.008	0.002	0.672	0.316	0.002
1834	12	7	Saint_Paul_Field_2014	PI371819	2-row	Weah	COLLECTED	Jordan	NA	UNCERTAIN	31.598	36.314	0.357	0.001	0.637	0.003	0.002
1835	12	6	Saint_Paul_Field_2014	PI321823	2-row	Proskovcuv Hanacky	DEVELOPED	Czechoslovakia	NA	CULTIVAR	48.607	17.206	0.002	0.001	0.883	0.111	0.002	NAM Parent
1836	12	5	Saint_Paul_Field_2014	PI643377	2-row	ND24393	DEVELOPED	United States	North Dakota	BREEDING	47.2022	-101.351	0.012	0.011	0.481	0.494	0.003
1837	12	4	Saint_Paul_Field_2014	PI190200	2-row	Aurore 1	DONATED	Europe	NA	UNCERTAIN	54.526	15.2551	0.001	0.001	0.996	0.001	0.001	NAM Parent
1838	12	3	Saint_Paul_Field_2014	PI253938	2-row	K1311	COLLECTED	Iraq	As Sulaymaniyah	LANDRACE	35.55	45.4333	0.382	0.252	0.223	0.033	0.11
1839	12	2	Saint_Paul_Field_2014	PI639300	2-row	K2003-50	COLLECTED	Kazakhstan	Alma-Ata	LANDRACE	44.6578	78.3475	0.556	0.007	0.18	0.186	0.07
1840	12	1	Saint_Paul_Field_2014	PI525199	2-row	Beatrice	DEVELOPED	France	Yvelines	CULTIVAR	48.374	2.313	0.047	0.003	0.76	0.063	0.127

## Sheet: 2014_Field_Design
	Type II Modified Augmented Design
	70 columns x 12 rows
	1	2	3	4	5	6	7	8	9	10	11	12	13	14	15	16	17	18	19	20	21	22	23	24	25	26	27	28	29	30	31	32	33	34	35	36	37	38	39	40	41	42	43	44	45	46	47	48	49
12	1840	1839	1838	1837	1836	1835	1834	1833	1832	1831	1830	1829	1828	1827	1826	1825	1824	1823	1822	1821	1820	1819	1818	1817	1816	1815	1814	1813	1812	1811	1810	1809	1808	1807	1806	1805	1804	1803	1802	1801	1800	1799	1798	1797	1796	1795	1794	1793	1792
11	1701	1702	1703	1704	1705	1706	1707	1708	1709	1710	1711	1712	1713	1714	1715	1716	1717	1718	1719	1720	1721	1722	1723	1724	1725	1726	1727	1728	1729	1730	1731	1732	1733	1734	1735	1736	1737	1738	1739	1740	1741	1742	1743	1744	1745	1746	1747	1748	1749
10	1700	1699	1698	1697	1696	1695	1694	1693	1692	1691	1690	1689	1688	1687	1686	1685	1684	1683	1682	1681	1680	1679	1678	1677	1676	1675	1674	1673	1672	1671	1670	1669	1668	1667	1666	1665	1664	1663	1662	1661	1660	1659	1658	1657	1656	1655	1654	1653	1652
9	1561	1562	1563	1564	1565	1566	1567	1568	1569	1570	1571	1572	1573	1574	1575	1576	1577	1578	1579	1580	1581	1582	1583	1584	1585	1586	1587	1588	1589	1590	1591	1592	1593	1594	1595	1596	1597	1598	1599	1600	1601	1602	1603	1604	1605	1606	1607	1608	1609
8	1560	1559	1558	1557	1556	1555	1554	1553	1552	1551	1550	1549	1548	1547	1546	1545	1544	1543	1542	1541	1540	1539	1538	1537	1536	1535	1534	1533	1532	1531	1530	1529	1528	1527	1526	1525	1524	1523	1522	1521	1520	1519	1518	1517	1516	1515	1514	1513	1512
7	1421	1422	1423	1424	1425	1426	1427	1428	1429	1430	1431	1432	1433	1434	1435	1436	1437	1438	1439	1440	1441	1442	1443	1444	1445	1446	1447	1448	1449	1450	1451	1452	1453	1454	1455	1456	1457	1458	1459	1460	1461	1462	1463	1464	1465	1466	1467	1468	1469
6	1420	1419	1418	1417	1416	1415	1414	1413	1412	1411	1410	1409	1408	1407	1406	1405	1404	1403	1402	1401	1400	1399	1398	1397	1396	1395	1394	1393	1392	1391	1390	1389	1388	1387	1386	1385	1384	1383	1382	1381	1380	1379	1378	1377	1376	1375	1374	1373	1372
5	1281	1282	1283	1284	1285	1286	1287	1288	1289	1290	1291	1292	1293	1294	1295	1296	1297	1298	1299	1300	1301	1302	1303	1304	1305	1306	1307	1308	1309	1310	1311	1312	1313	1314	1315	1316	1317	1318	1319	1320	1321	1322	1323	1324	1325	1326	1327	1328	1329
4	1280	1279	1278	1277	1276	1275	1274	1273	1272	1271	1270	1269	1268	1267	1266	1265	1264	1263	1262	1261	1260	1259	1258	1257	1256	1255	1254	1253	1252	1251	1250	1249	1248	1247	1246	1245	1244	1243	1242	1241	1240	1239	1238	1237	1236	1235	1234	1233	1232
3	1141	1142	1143	1144	1145	1146	1147	1148	1149	1150	1151	1152	1153	1154	1155	1156	1157	1158	1159	1160	1161	1162	1163	1164	1165	1166	1167	1168	1169	1170	1171	1172	1173	1174	1175	1176	1177	1178	1179	1180	1181	1182	1183	1184	1185	1186	1187	1188	1189
2	1140	1139	1138	1137	1136	1135	1134	1133	1132	1131	1130	1129	1128	1127	1126	1125	1124	1123	1122	1121	1120	1119	1118	1117	1116	1115	1114	1113	1112	1111	1110	1109	1108	1107	1106	1105	1104	1103	1102	1101	1100	1099	1098	1097	1096	1095	1094	1093	1092
1	1001	1002	1003	1004	1005	1006	1007	1008	1009	1010	1011	1012	1013	1014	1015	1016	1017	1018	1019	1020	1021	1022	1023	1024	1025	1026	1027	1028	1029	1030	1031	1032	1033	1034	1035	1036	1037	1038	1039	1040	1041	1042	1043	1044	1045	1046	1047	1048	1049
	Primary Check
	Secondary Check 1
	Secondary Check 2
	Individual blocks are outlined with a thicker line
[truncated: 21 more columns]

## Sheet: 2015_Planting_List
Plot	Plot Row	Plot Col	Enviro	Accession	Spike type	Plant Name	Source Type	Country	Region	Status	Latitude	Longitude	SP1	SP2	SP3	SP4	SP5	Notes
2001	1	1	Saint_Paul_Field_2015	PI328015	2-row	Thigina 2621	DEVELOPED	Romania	NA	CULTIVAR	45.9432	24.9668	0.002	0.001	0.992	0.003	0.002	NAM Parent.
2002	1	2	Saint_Paul_Field_2015	PI268256	2-row	54	COLLECTED	Iran	Fars	LANDRACE	30.2416	51.4588	0.215	0.365	0.242	0.008	0.17
2003	1	3	Saint_Paul_Field_2015	PI422226	2-row	NA	COLLECTED	Yemen	NA	LANDRACE	13.0333	43.9	0.174	0.164	0.01	0.011	0.641
2004	1	4	Saint_Paul_Field_2015	PI253313	2-row	17485	COLLECTED	Bosnia and Herzegovina	NA	LANDRACE	44.4158	17.0861	0.004	0.006	0.836	0.152	0.002
2005	1	5	Saint_Paul_Field_2015	PI643226	2-row	ND4758-1	DEVELOPED	United States	North Dakota	BREEDING	47.1141	-98.9887	0.002	0.003	0.707	0.281	0.006
2006	1	6	Saint_Paul_Field_2015	PI643361	2-row	ND22170	DEVELOPED	United States	North Dakota	BREEDING	47.5994	-101.357	0.054	0.004	0.438	0.497	0.007
2007	1	7	Saint_Paul_Field_2015	PI592282	2-row	Merchant	DEVELOPED	United Kingdom	England	CULTIVAR	52.87	-0.42	0.011	0.003	0.968	0.004	0.013
2008	1	8	Saint_Paul_Field_2015	CIho14250	2-row	Duab	COLLECTED	Afghanistan	Badakhshan	LANDRACE	36.8469	70.5319	0.121	0.498	0.21	0.01	0.162	NAM Parent
2009	1	9	Saint_Paul_Field_2015	PI372077	2-row	Mestnyj	COLLECTED	Armenia	Loá¹™i	LANDRACE	40.9633	44.6517	0.007	0.018	0.586	0.384	0.004
2010	1	10	Saint_Paul_Field_2015	PI388645	2-row	Stepovyj	DEVELOPED	Ukraine	Odesa	CULTIVAR	46.454	30.532	0.007	0.002	0.934	0.05	0.008	NAM Parent
2011	1	11	Saint_Paul_Field_2015	PI386559	2-row	IAR/B/37	COLLECTED	Ethiopia	Gonder	LANDRACE	11.85	38.0167	0.001	0.001	0.002	0.001	0.996
2012	1	12	Saint_Paul_Field_2015	PI573687	2-row	SN-2158	COLLECTED	Georgia	NA	LANDRACE	42.4056	45.1297	0.118	0.42	0.275	0.025	0.162
2013	1	13	Saint_Paul_Field_2015	PI573594	2-row	Auksiniaj 3	DEVELOPED	Lithuania	NA	CULTIVAR	55.918	22.202	0.115	0.079	0.724	0.057	0.025
2014	1	14	Saint_Paul_Field_2015	PI606311	2-row	15077	COLLECTED	Saudi Arabia	NA	LANDRACE	21.2667	40.4167	0.249	0.126	0.134	0.008	0.482
2015	1	15	Saint_Paul_Field_2015	PI467846	2-row	Antarctica 04	DEVELOPED	Brazil	NA	CULTIVAR	-7.579	-52.26	0.008	0.006	0.76	0.224	0.001
2016	1	16	Saint_Paul_Field_2015	PI392492	2-row	Welgevallen 62-13-86	DEVELOPED	South Africa	Cape Province	BREEDING	-32.042	23.764	0.398	0.002	0.594	0.004	0.002
2017	1	17	Saint_Paul_Field_2015	CIho5989	2-row	Spratt Archer	DEVELOPED	Ireland	NA	CULTIVAR	53.1424	-7.69205	0.003	0.01	0.967	0.019	0.002	NAM Parent
2018	1	18	Saint_Paul_Field_2015	CIho11796	2-row	Hindu Kusch	COLLECTED	Netherlands	NA	UNCERTAIN	52.1326	5.29126	0.021	0.01	0.008	0.047	0.914	NAM Parent. Replaced line that did not flower in 2014.
2019	1	19	Saint_Paul_Field_2015	PI611576	2-row	Prevenets	DEVELOPED	Ukraine	NA	CULTIVAR	46.308	32.404	0.017	0.059	0.701	0.167	0.055
2020	1	20	Saint_Paul_Field_2015	PI268176	2-row	Stupicky Hanacky	DEVELOPED	Czechoslovakia	NA	CULTIVAR	49.6022	14.4863	0.004	0.002	0.852	0.14	0.003	NAM Parent
2021	1	21	Saint_Paul_Field_2015	PI349359	2-row	RPB 5	DEVELOPED	United Kingdom	England	BREEDING	52.86	-1.12	0.006	0.022	0.918	0.051	0.003
2022	1	22	Saint_Paul_Field_2015	CIho13141	2-row	CI 13141	COLLECTED	Ethiopia	NA	LANDRACE	10.27	34.99	0.076	0.054	0.021	0.006	0.844
2023	1	23	Saint_Paul_Field_2015	PI429313	2-row	NA	COLLECTED	Yemen	NA	LANDRACE	15.5167	43.9	0.22	0.011	0.029	0.012	0.727
2024	1	24	Saint_Paul_Field_2015	PI342270	2-row	2546	COLLECTED	Turkey	Kutahya	LANDRACE	39.3153	29.5977	0.24	0.052	0.347	0.204	0.158
2025	1	25	Saint_Paul_Field_2015	PI564461	2-row	Krassi	COLLECTED	Bulgaria	Plovdiv	CULTIVAR	42.0133	24.5035	0.042	0.003	0.657	0.286	0.013
2026	1	26	Saint_Paul_Field_2015	PI573661	2-row	AR 9610/82	COLLECTED	Georgia	NA	LANDRACE	43.0333	42.8333	0.064	0.405	0.256	0.129	0.146
2027	1	27	Saint_Paul_Field_2015	PI297408	2-row	Delta	DEVELOPED	Netherlands	South Holland	CULTIVAR	51.5741	4.76436	0.024	0.005	0.938	0.011	0.023
2028	1	28	Saint_Paul_Field_2015	PI330399	2-row	Jantar	DEVELOPED	Czech Republic	East Bohemia	CULTIVAR	50.12	16.51	0.001	0.001	0.996	0.001	0.001
2029	1	29	Saint_Paul_Field_2015	PI447137	2-row	NA	COLLECTED	Spain	Huesca	UNCERTAIN	42.05	-0.583333	0.002	0.001	0.995	0.001	0.001	NAM Parent
2030	1	30	Saint_Paul_Field_2015	PI146663	2-row	Research	DEVELOPED	Australia	Victoria	CULTIVAR	-37.38	144.84	0.27	0.001	0.721	0.005	0.002
2031	1	31	Saint_Paul_Field_2015	PI592167	2-row	Tay	DEVELOPED	United Kingdom	Scotland	CULTIVAR	56.736	-3.179	0.002	0.001	0.936	0.06	0.001
2032	1	32	Saint_Paul_Field_2015	PI151787	2-row	Abyssinian 12	COLLECTED	Ethiopia	NA	LANDRACE	8.47	37.34	0.001	0.001	0.001	0.001	0.995
2033	1	33	Saint_Paul_Field_2015	PI296453	2-row	H-2170	COLLECTED	Eritrea	Asmara	LANDRACE	15.6431	39.0886	0.003	0.002	0.003	0.004	0.988
2034	1	34	Saint_Paul_Field_2015	PI614939	2-row	Heris	DEVELOPED	Czech Republic	South Moravia	CULTIVAR	48.994	16.847	0.036	0.06	0.819	0.004	0.08	Secondary Check 1
2035	1	35	Saint_Paul_Field_2015	PI573663	2-row	SN-33	COLLECTED	Georgia	NA	LANDRACE	43.0911	42.917	0.08	0.469	0.31	0.02	0.12
2036	1	36	Saint_Paul_Field_2015	PI95270	6-row	399a	COLLECTED	Unknown	NA	LANDRACE	NA	NA	0.001	0.001	0.001	0.001	0.996
2037	1	37	Saint_Paul_Field_2015	PI640342	6-row	TX01D339	DEVELOPED	United States	Texas	BREEDING	32.2897	-97.7973	0.207	0.11	0.07	0.503	0.109
2038	1	38	Saint_Paul_Field_2015	PI584977	6-row	Tai Yuan Liu Cao Da Mai	COLLECTED	China	Shanxi	LANDRACE	37	112	0.001	0.995	0.001	0.001	0.001	NAM Parent
2039	1	39	Saint_Paul_Field_2015	PI198734	6-row	CIho 9878	COLLECTED	Afghanistan	Ghazni	LANDRACE	33.5567	68.4258	0.017	0.782	0.006	0.029	0.165
2040	1	40	Saint_Paul_Field_2015	CIho14052	6-row	36	COLLECTED	Algeria	Biskra	LANDRACE	34.85	5.73333	0.944	0.004	0.014	0.032	0.006	NAM Parent
2041	1	41	Saint_Paul_Field_2015	PI292018	6-row	Nissanith	DEVELOPED	Israel	NA	CULTIVAR	NA	NA	NA	NA	NA	NA	NA	Excluded from GWAS due to high amounts of missing SNP data or heterozygosity.
2042	1	42	Saint_Paul_Field_2015	CIho7247	6-row	B120-247-8	DEVELOPED	United States	Utah	BREEDING	39.291	-110.868	0.754	0.014	0.036	0.189	0.007	NAM Parent
2043	1	43	Saint_Paul_Field_2015	PI138698	6-row	5195	COLLECTED	Iran	Lorestan	LANDRACE	27.3167	56.2833	0.213	0.667	0.012	0.012	0.096
2044	1	44	Saint_Paul_Field_2015	PI87782	6-row	Yojo	COLLECTED	Korea, North	Pyongan Nam	LANDRACE	39.9541	126.207	0.002	0.793	0.002	0.202	0.002
2045	1	45	Saint_Paul_Field_2015	PI129482	6-row	Oziery	COLLECTED	Poland	Krakow	UNCERTAIN	49.9428	19.5349	0.405	0.001	0.003	0.589	0.002	NAM Parent
2046	1	46	Saint_Paul_Field_2015	PI282616	6-row	11007	COLLECTED	Israel	NA	LANDRACE	30.715	34.727	0.108	0.013	0.024	0.829	0.025	NAM Parent
2047	1	47	Saint_Paul_Field_2015	PI531917	6-row	1692	COLLECTED	Egypt	Kafr al-Sheikh	LANDRACE	31.3114	31.1558	0.706	0.13	0.018	0.003	0.142	NAM Parent
2048	1	48	Saint_Paul_Field_2015	CIho6091	6-row	C.A.N. 1098	DEVELOPED	Canada	Ontario	BREEDING	51.3038	85.3732	0.006	0.113	0.013	0.862	0.005
2049	1	49	Saint_Paul_Field_2015	PI327860	6-row	HOR 4182	COLLECTED	Turkmenistan	NA	LANDRACE	39.1671	59.3986	0.002	0.99	0.002	0.005	0.002	Secondary Check 2
2050	1	50	Saint_Paul_Field_2015	PI237581	6-row	II-831-4B-1B-1-5B	DEVELOPED	Colombia	Cundinamarca	BREEDING	4.847	-74.2585	0.479	0.008	0.059	0.198	0.255
2051	1	51	Saint_Paul_Field_2015	PI270645	6-row	47	COLLECTED	Peru	Puno	LANDRACE	-15.9098	-69.9236	0.994	0.002	0.001	0.001	0.001
2052	1	52	Saint_Paul_Field_2015	PI393995	6-row	Hankkija 673	DEVELOPED	Finland	NA	CULTIVAR	63.5515	27.3756	0.03	0.408	0.017	0.477	0.067
2053	1	53	Saint_Paul_Field_2015	CIho4083	6-row	4011	COLLECTED	Mongolia	Govi-Altay	LANDRACE	46.5321	96.5009	0.003	0.98	0.005	0.004	0.008
2054	1	54	Saint_Paul_Field_2015	PI402127	6-row	MCU 3649	COLLECTED	Colombia	Cundinamarca	UNCERTAIN	4.83827	-74.2998	0.203	0.008	0.005	0.78	0.004
2055	1	55	Saint_Paul_Field_2015	CIho2547	6-row	Orzo Nudo di Altamura 1921	DEVELOPED	Italy	Apulia	BREEDING	40.658	17.562	0.569	0.132	0.011	0.284	0.004
2056	1	56	Saint_Paul_Field_2015	PI434795	6-row	QB 709.5	DEVELOPED	Canada	Quebec	BREEDING	52.9524	-73.5415	0.003	0.005	0.077	0.909	0.006
2057	1	57	Saint_Paul_Field_2015	PI447146	6-row	NA	COLLECTED	Spain	Zaragoza	UNCERTAIN	41.6833	-1.23333	0.961	0.004	0.004	0.026	0.004
2058	1	58	Saint_Paul_Field_2015	CIho5058	6-row	Sentinel	COLLECTED	Australia	New South Wales	UNCERTAIN	-32.5787	145.932	0.353	0.003	0.399	0.243	0.002
2059	1	59	Saint_Paul_Field_2015	CIho16008	6-row	Isogenic: Gillette-Haired Glume (stb,s)	DEVELOPED	United States	Maryland	GENETIC	39.0958	76.6913	0.002	0.045	0.002	0.949	0.002
2060	1	60	Saint_Paul_Field_2015	PI270667	6-row	69	COLLECTED	Peru	Puno	LANDRACE	NA	NA	NA	NA	NA	NA	NA	Excluded from GWAS due to high amounts of missing SNP data or heterozygosity.
2061	1	61	Saint_Paul_Field_2015	CIho1604	6-row	Hillsa	COLLECTED	Ethiopia	NA	LANDRACE	7.99	41.32	0.004	0.99	0.001	0.001	0.002
2062	1	62	Saint_Paul_Field_2015	PI223883	6-row	Jow	COLLECTED	Afghanistan	Kondoz	LANDRACE	36.6831	69.1136	0.002	0.993	0.002	0.002	0.002	NAM Parent
2063	1	63	Saint_Paul_Field_2015	PI467684	6-row	4235	COLLECTED	Portugal	Coimbra	LANDRACE	40.0333	-8.38333	0.947	0.004	0.011	0.033	0.006
2064	1	64	Saint_Paul_Field_2015	CIho16676	6-row	Isogenic: 6-Row Small Lateral Lax Head	DEVELOPED	United States	Montana	GENETIC	47.3098	-110.211	0.451	0.029	0.344	0.165	0.011
2065	1	65	Saint_Paul_Field_2015	PI188831	6-row	Edda II	DEVELOPED	Sweden	Malmohus	CULTIVAR	55.9903	13.5958	0.002	0.002	0.002	0.98	0.013
2066	1	66	Saint_Paul_Field_2015	PI564648	6-row	7012	COLLECTED	Oman	NA	LANDRACE	23.5	57.1667	0.332	0.314	0.006	0.003	0.345
2067	1	67	Saint_Paul_Field_2015	PI194952	6-row	9244	COLLECTED	Ethiopia	Gonder	LANDRACE	13.076	37.88	0.001	0.001	0.001	0.001	0.995
2068	1	68	Saint_Paul_Field_2015	PI329042	6-row	HOR 1027	COLLECTED	Greece	Peloponnese	LANDRACE	37.15	21.9667	0.94	0.023	0.01	0.004	0.022
2069	1	69	Saint_Paul_Field_2015	PI640100	6-row	TX02D321	DEVELOPED	United States	Texas	BREEDING	32.4243	-97.6627	0.166	0.125	0.018	0.624	0.067
2070	1	70	Saint_Paul_Field_2015	PI382982	6-row	GAW 87-1	COLLECTED	Ethiopia	Tigre	LANDRACE	12.9503	39.2195	0.001	0.001	0.001	0.001	0.997
2071	2	70	Saint_Paul_Field_2015	PI420459	6-row	IV/188	COLLECTED	Macedonia	NA	LANDRACE	41.6086	21.7453	0.111	0.008	0.008	0.869	0.005
2072	2	69	Saint_Paul_Field_2015	PI244791	6-row	5035	COLLECTED	Afghanistan	Parwan	LANDRACE	35.0161	69.1747	0.002	0.988	0.003	0.003	0.004
2073	2	68	Saint_Paul_Field_2015	Rasmussen	6-row	Rasmussen	DEVELOPED	United States	South Dakota	CULTIVAR	NA	NA	NA	NA	NA	NA	NA	Primary Check
2074	2	67	Saint_Paul_Field_2015	PI273905	6-row	1997	COLLECTED	Ethiopia	Kefa	LANDRACE	7.54025	36.2534	0.008	0.003	0.002	0.007	0.98
2075	2	66	Saint_Paul_Field_2015	PI611502	6-row	Arkhangel'skii Mestnyi	DEVELOPED	Russian Federation	Arkhangelsk	CULTIVAR	64.566	40.597	0.002	0.001	0.003	0.989	0.004
2076	2	65	Saint_Paul_Field_2015	PI156654	6-row	Chervonec	DEVELOPED	Russian Federation	Irkutsk	CULTIVAR	52.287	104.305	0.002	0.002	0.004	0.99	0.002
2077	2	64	Saint_Paul_Field_2015	PI525187	6-row	Kilta	DEVELOPED	Finland	NA	CULTIVAR	63.6133	27.4374	0.003	0.002	0.032	0.956	0.007
2078	2	63	Saint_Paul_Field_2015	Rasmussen	6-row	Rasmussen	DEVELOPED	United States	South Dakota	CULTIVAR	NA	NA	NA	NA	NA	NA	NA	Primary Check
2079	2	62	Saint_Paul_Field_2015	CIho14880	6-row	ELS 6402-467	COLLECTED	Eritrea	Asmara	LANDRACE	15.3062	38.9933	0.001	0.001	0.001	0.001	0.996
2080	2	61	Saint_Paul_Field_2015	PI467815	6-row	Etu	DEVELOPED	Finland	NA	CULTIVAR	64.2519	28.076	0.002	0.002	0.373	0.622	0.001
2081	2	60	Saint_Paul_Field_2015	PI564456	6-row	Rojen	COLLECTED	Bulgaria	Plovdiv	CULTIVAR	41.9656	24.9766	0.399	0.01	0.005	0.582	0.003
2082	2	59	Saint_Paul_Field_2015	PI620640	6-row	AC Ranger	DEVELOPED	Canada	Manitoba	CULTIVAR	55.0667	-97.5167	0.034	0.015	0.015	0.871	0.065
2083	2	58	Saint_Paul_Field_2015	Rasmussen	6-row	Rasmussen	DEVELOPED	United States	South Dakota	CULTIVAR	NA	NA	NA	NA	NA	NA	NA	Primary Check
2084	2	57	Saint_Paul_Field_2015	PI87780	6-row	Hadaka Mugi	COLLECTED	Korea, North	Pyongan Nam	LANDRACE	39.6304	126.859	0.001	0.843	0.002	0.151	0.003
2085	2	56	Saint_Paul_Field_2015	PI129491	6-row	Nr. 14	COLLECTED	Tunisia	NA	UNCERTAIN	33.638	9.527	0.736	0.001	0.004	0.257	0.002
2086	2	55	Saint_Paul_Field_2015	PI361687	6-row	Jadar	DEVELOPED	Norway	NA	CULTIVAR	60.772	8.7689	0.016	0.008	0.041	0.912	0.023
2087	2	54	Saint_Paul_Field_2015	PI584904	6-row	Escourgeon Extra Hatif	DEVELOPED	France	NA	CULTIVAR	47.49	3.597	0.788	0.004	0.01	0.196	0.002
2088	2	53	Saint_Paul_Field_2015	Rasmussen	6-row	Rasmussen	DEVELOPED	United States	South Dakota	CULTIVAR	NA	NA	NA	NA	NA	NA	NA	Primary Check
2089	2	52	Saint_Paul_Field_2015	PI430745	6-row	NA	COLLECTED	Yemen	NA	LANDRACE	15.65	43.9667	0.005	0.014	0.005	0.974	0.002
2090	2	51	Saint_Paul_Field_2015	PI344874	6-row	15	COLLECTED	Macedonia	NA	LANDRACE	41.8	20.9	0.119	0.006	0.004	0.866	0.006
2091	2	50	Saint_Paul_Field_2015	PI402037	6-row	MCU 3559	COLLECTED	Colombia	Cundinamarca	UNCERTAIN	5.49166	-73.6695	0.265	0.003	0.006	0.541	0.185	NAM Parent
2092	2	49	Saint_Paul_Field_2015	PI402101	6-row	MCU 3623	COLLECTED	Colombia	Cundinamarca	UNCERTAIN	5.49137	-74.1924	0.343	0.002	0.097	0.555	0.003
2093	2	48	Saint_Paul_Field_2015	Rasmussen	6-row	Rasmussen	DEVELOPED	United States	South Dakota	CULTIVAR	NA	NA	NA	NA	NA	NA	NA	Primary Check
2094	2	47	Saint_Paul_Field_2015	CIho3240	6-row	Bahtim	COLLECTED	Egypt	NA	UNCERTAIN	30.164	28.035	0.959	0.028	0.005	0.005	0.004
2095	2	46	Saint_Paul_Field_2015	PI320217	6-row	C.P.I. 28364	COLLECTED	Australia	Western Australia	UNCERTAIN	-15.5591	127.322	0.964	0.014	0.004	0.004	0.014	NAM Parent
2096	2	45	Saint_Paul_Field_2015	CIho6020	6-row	Success	COLLECTED	Australia	New South Wales	UNCERTAIN	-33.0525	145.665	0.992	0.002	0.001	0.004	0.001	NAM Parent
2097	2	44	Saint_Paul_Field_2015	PI640236	6-row	TX01D232	DEVELOPED	United States	Texas	BREEDING	32.4152	-97.6718	0.32	0.134	0.002	0.541	0.003
2098	2	43	Saint_Paul_Field_2015	Rasmussen	6-row	Rasmussen	DEVELOPED	United States	South Dakota	CULTIVAR	NA	NA	NA	NA	NA	NA	NA	Primary Check
2099	2	42	Saint_Paul_Field_2015	CIho2236	6-row	Reids Triumph	COLLECTED	United States	Idaho	UNCERTAIN	45.0183	-114.643	0.003	0.003	0.367	0.625	0.002
2100	2	41	Saint_Paul_Field_2015	PI531896	6-row	1271	COLLECTED	Egypt	NA	UNCERTAIN	27.53	30.03	0.667	0.151	0.011	0.002	0.169	NAM Parent
2101	2	40	Saint_Paul_Field_2015	PI290346	6-row	Abessinische 6 Zlg	COLLECTED	Ethiopia	NA	LANDRACE	8.0351	41.58	0.121	0.004	0.014	0.656	0.205
2102	2	39	Saint_Paul_Field_2015	PI327860	6-row	HOR 4182	COLLECTED	Turkmenistan	NA	LANDRACE	39.1671	59.3986	0.002	0.99	0.002	0.005	0.002
2103	2	38	Saint_Paul_Field_2015	Rasmussen	6-row	Rasmussen	DEVELOPED	United States	South Dakota	CULTIVAR	NA	NA	NA	NA	NA	NA	NA	Primary Check
2104	2	37	Saint_Paul_Field_2015	PI295956	6-row	BT Hazera 127/1	COLLECTED	Israel	NA	BREEDING	31.317	34.321	0.868	0.064	0.016	0.022	0.029
2105	2	36	Saint_Paul_Field_2015	CIho11788	6-row	Harar	COLLECTED	Ethiopia	Harer	UNCERTAIN	9.5	41.5	0.136	0.002	0.311	0.158	0.393
2106	2	35	Saint_Paul_Field_2015	PI498438	2-row	Pukako	DEVELOPED	New Zealand	NA	CULTIVAR	-40.405	176.078	0.051	0.002	0.889	0.055	0.002
2107	2	34	Saint_Paul_Field_2015	PI584855	2-row	Priver	DEVELOPED	France	NA	CULTIVAR	47.217	3.42	0.166	0.276	0.409	0.136	0.013
2108	2	33	Saint_Paul_Field_2015	Conlon	2-row	Conlon	DEVELOPED	United States	South Dakota	CULTIVAR	NA	NA	NA	NA	NA	NA	NA	Primary Check
2109	2	32	Saint_Paul_Field_2015	PI584962	2-row	Mi Mai 114	COLLECTED	China	Zhejiang	LANDRACE	28.6904	119.977	0.013	0.359	0.475	0.147	0.006	Secondary Check 2
2110	2	31	Saint_Paul_Field_2015	PI371384	2-row	2001A	COLLECTED	Switzerland	Graubunden	LANDRACE	46.95	10.4	0.036	0.048	0.439	0.474	0.003
2111	2	30	Saint_Paul_Field_2015	PI369732	2-row	Har'kovskij 306	DEVELOPED	Ukraine	Kharkiv	CULTIVAR	49.9941	36.4994	0.119	0.269	0.375	0.139	0.098
2112	2	29	Saint_Paul_Field_2015	PI371477	2-row	2119D	COLLECTED	Switzerland	Graubunden	LANDRACE	46.6333	9.41667	0.003	0.003	0.506	0.479	0.008
2113	2	28	Saint_Paul_Field_2015	Conlon	2-row	Conlon	DEVELOPED	United States	South Dakota	CULTIVAR	NA	NA	NA	NA	NA	NA	NA	Primary Check
2114	2	27	Saint_Paul_Field_2015	PI372102	2-row	Polesskij	DEVELOPED	Belarus	Minsk	CULTIVAR	53.826	27.502	0.002	0.002	0.949	0.044	0.003	NAM Parent
2115	2	26	Saint_Paul_Field_2015	PI371172	2-row	1282B	COLLECTED	Switzerland	Valais	LANDRACE	46.4145	7.13304	0.038	0.2	0.287	0.472	0.003
2116	2	25	Saint_Paul_Field_2015	PI313113	2-row	Europa	DEVELOPED	Germany	Baden-Wurttemberg	CULTIVAR	48.604	9.408	0.002	0.004	0.982	0.003	0.01
2117	2	24	Saint_Paul_Field_2015	PI290743	2-row	Kenya Research	DEVELOPED	Kenya	Rift Valley	CULTIVAR	-0.066	35.278	0.24	0.001	0.746	0.011	0.002
2118	2	23	Saint_Paul_Field_2015	Conlon	2-row	Conlon	DEVELOPED	United States	South Dakota	CULTIVAR	NA	NA	NA	NA	NA	NA	NA	Primary Check
2119	2	22	Saint_Paul_Field_2015	PI643314	2-row	ND17470	DEVELOPED	United States	North Dakota	BREEDING	47.5976	-101	0.029	0.007	0.484	0.361	0.12
2120	2	21	Saint_Paul_Field_2015	PI129477	2-row	Miejscowy z Podkarpacia	COLLECTED	Poland	Krakow	UNCERTAIN	50.2281	19.5376	0.067	0.361	0.007	0.561	0.005
2121	2	20	Saint_Paul_Field_2015	PI428634	2-row	Topas	DEVELOPED	Czechoslovakia	NA	CULTIVAR	48.976	18.338	0.001	0.001	0.996	0.001	0.001
2122	2	19	Saint_Paul_Field_2015	PI392491	2-row	Welgevallen 60-A-3-11	DEVELOPED	South Africa	Cape Province	BREEDING	-29.2532	21.6435	0.441	0.002	0.549	0.006	0.002	NAM Parent
2123	2	18	Saint_Paul_Field_2015	Conlon	2-row	Conlon	DEVELOPED	United States	South Dakota	CULTIVAR	NA	NA	NA	NA	NA	NA	NA	Primary Check
2124	2	17	Saint_Paul_Field_2015	PI223130	2-row	Arabi	COLLECTED	Jordan	NA	UNCERTAIN	30.59	36.24	0.449	0.161	0.163	0.018	0.209
2125	2	16	Saint_Paul_Field_2015	PI283416	2-row	0-20-309	COLLECTED	Czechoslovakia	NA	UNCERTAIN	49.6112	14.8258	0.009	0.347	0.582	0.055	0.007	NAM Parent
2126	2	15	Saint_Paul_Field_2015	PI371819	2-row	Weah	COLLECTED	Jordan	NA	UNCERTAIN	31.598	36.314	0.357	0.001	0.637	0.003	0.002
2127	2	14	Saint_Paul_Field_2015	PI86185	2-row	39789	COLLECTED	Russian Federation	Leningrad	LANDRACE	60	32	0.163	0.444	0.256	0.014	0.122
2128	2	13	Saint_Paul_Field_2015	Conlon	2-row	Conlon	DEVELOPED	United States	South Dakota	CULTIVAR	NA	NA	NA	NA	NA	NA	NA	Primary Check
2129	2	12	Saint_Paul_Field_2015	PI371392	2-row	2004E	COLLECTED	Switzerland	Graubunden	LANDRACE	NA	NA	NA	NA	NA	NA	NA	Excluded from GWAS due to high amounts of missing SNP data or heterozygosity.
2130	2	11	Saint_Paul_Field_2015	PI584962	2-row	Mi Mai 114	COLLECTED	China	Zhejiang	LANDRACE	28.6904	119.977	0.013	0.359	0.475	0.147	0.006
2131	2	10	Saint_Paul_Field_2015	CIho13797	2-row	Fergus	DEVELOPED	Canada	Ontario	CULTIVAR	52.525	-87.078	0.012	0.001	0.984	0.002	0.001
2132	2	9	Saint_Paul_Field_2015	PI436146	2-row	219	COLLECTED	Chile	La Araucania	LANDRACE	-38.7333	-73	0.001	0.001	0.996	0.001	0.001	NAM Parent
2133	2	8	Saint_Paul_Field_2015	Conlon	2-row	Conlon	DEVELOPED	United States	South Dakota	CULTIVAR	NA	NA	NA	NA	NA	NA	NA	Primary Check
2134	2	7	Saint_Paul_Field_2015	PI296998	2-row	B.273-0-26-00a3	DEVELOPED	Argentina	Buenos Aires	BREEDING	35.0968	58.8747	0.181	0.645	0.165	0.006	0.003
2135	2	6	Saint_Paul_Field_2015	PI639300	2-row	K2003-50	COLLECTED	Kazakhstan	Alma-Ata	LANDRACE	44.6578	78.3475	0.556	0.007	0.18	0.186	0.07
2136	2	5	Saint_Paul_Field_2015	PI611503	2-row	Akhaltesli Mestnyi	DEVELOPED	Georgia	NA	CULTIVAR	42.6016	43.6431	0.091	0.366	0.322	0.164	0.057
2137	2	4	Saint_Paul_Field_2015	PI184884	2-row	Maja	DEVELOPED	Denmark	NA	CULTIVAR	55.9842	9.86402	0.001	0.001	0.996	0.001	0.001	NAM Parent
2138	2	3	Saint_Paul_Field_2015	Conlon	2-row	Conlon	DEVELOPED	United States	South Dakota	CULTIVAR	NA	NA	NA	NA	NA	NA	NA	Primary Check
2139	2	2	Saint_Paul_Field_2015	PI611512	2-row	Viking	DEVELOPED	Russian Federation	Kirov	CULTIVAR	57.316	48.804	0.014	0.002	0.822	0.151	0.01
2140	2	1	Saint_Paul_Field_2015	PI283441	2-row	C.P.I. 15700	COLLECTED	Ethiopia	NA	LANDRACE	9.495	40.8397	0.069	0.026	0.021	0.006	0.878
2141	3	1	Saint_Paul_Field_2015	PI643323	2-row	ND18413-1	DEVELOPED	United States	North Dakota	BREEDING	47.4629	-100.572	0.006	0.004	0.576	0.388	0.026
2142	3	2	Saint_Paul_Field_2015	PI290259	2-row	Dobrovicky Kargyn	DEVELOPED	Czechoslovakia	NA	CULTIVAR	50.032	14.965	0.003	0.005	0.949	0.042	0.001	NAM Parent
2143	3	3	Saint_Paul_Field_2015	PI531901	2-row	1415	COLLECTED	Egypt	NA	UNCERTAIN	26.6336	30.4539	0.419	0.082	0.377	0.003	0.119
2144	3	4	Saint_Paul_Field_2015	PI234846	2-row	Kenya Research	DEVELOPED	Kenya	Rift Valley	CULTIVAR	-0.527	36.443	0.277	0.047	0.601	0.065	0.011	NAM Parent
2145	3	5	Saint_Paul_Field_2015	PI392427	2-row	Welgevallen 62-13-164	DEVELOPED	South Africa	Cape Province	BREEDING	-33.015	18.579	0.567	0.007	0.411	0.011	0.003
2146	3	6	Saint_Paul_Field_2015	PI320227	2-row	Early Challenger	COLLECTED	Australia	Western Australia	UNCERTAIN	-16.0921	127.684	0.459	0.002	0.533	0.004	0.002	NAM Parent
2147	3	7	Saint_Paul_Field_2015	PI95167	2-row	219	COLLECTED	Unknown	NA	LANDRACE	NA	NA	0.004	0.005	0.851	0.137	0.003	NAM Parent
2148	3	8	Saint_Paul_Field_2015	PI573662	2-row	SN-26	COLLECTED	Georgia	NA	LANDRACE	43.0544	42.8136	0.144	0.405	0.27	0.099	0.083
2149	3	9	Saint_Paul_Field_2015	PI467412	2-row	Proskowetz Hana Pedigree	DEVELOPED	Austria	NA	CULTIVAR	47.2967	14.479	0.003	0.007	0.968	0.021	0.002	NAM Parent
2150	3	10	Saint_Paul_Field_2015	PI436140	2-row	66	COLLECTED	Chile	La Araucania	LANDRACE	-38.9667	-72.7167	0.002	0.001	0.994	0.002	0.001
2151	3	11	Saint_Paul_Field_2015	PI599622	2-row	Safir	DEVELOPED	Czech Republic	NA	CULTIVAR	50.369	13.779	0.003	0.049	0.941	0.003	0.005
2152	3	12	Saint_Paul_Field_2015	CIho14978	2-row	ELS 6402-565	COLLECTED	Ethiopia	Tigre	LANDRACE	13.65	39.5667	0.001	0.001	0.002	0.001	0.994
2153	3	13	Saint_Paul_Field_2015	PI370867	2-row	391A	COLLECTED	Switzerland	Valais	LANDRACE	46.3167	7.95	0.006	0.01	0.455	0.511	0.018
2154	3	14	Saint_Paul_Field_2015	PI592188	2-row	Crescent	DEVELOPED	United Kingdom	Wales	CULTIVAR	51.6154	-3.551	0.058	0.003	0.912	0.003	0.025
2155	3	15	Saint_Paul_Field_2015	PI599625	2-row	Krystal	DEVELOPED	Czech Republic	NA	CULTIVAR	49.904	15.13	0.002	0.001	0.993	0.003	0.001	NAM Parent
2156	3	16	Saint_Paul_Field_2015	PI362203	2-row	Legia	DEVELOPED	Belgium	Namur	CULTIVAR	50.494	4.873	0.035	0.003	0.832	0.119	0.012	NAM Parent
2157	3	17	Saint_Paul_Field_2015	PI344938	2-row	71A	COLLECTED	Bosnia and Herzegovina	NA	LANDRACE	43.5589	19.0725	0.007	0.005	0.858	0.127	0.002	NAM Parent
2158	3	18	Saint_Paul_Field_2015	PI372084	2-row	Jogeva 1104	DEVELOPED	Estonia	NA	CULTIVAR	59.046	26.337	0.003	0.003	0.983	0.008	0.002
2159	3	19	Saint_Paul_Field_2015	PI182373	2-row	7141	COLLECTED	Turkey	Bayburt	LANDRACE	40.2833	40.1833	0.187	0.248	0.352	0.018	0.195
2160	3	20	Saint_Paul_Field_2015	PI422233	2-row	NA	COLLECTED	Yemen	Bir Al Gahum	LANDRACE	15.4184	44.0468	0.003	0.006	0.536	0.447	0.008	NAM Parent
2161	3	21	Saint_Paul_Field_2015	PI382343	2-row	GAW 86-2	COLLECTED	Ethiopia	Tigre	LANDRACE	12.8663	39.4147	0.002	0.002	0.003	0.002	0.992
2162	3	22	Saint_Paul_Field_2015	PI412946	2-row	G 342	COLLECTED	South Africa	Cape Province	UNCERTAIN	-32	22	0.127	0.001	0.868	0.002	0.002	NAM Parent
2163	3	23	Saint_Paul_Field_2015	PI94806	2-row	348	COLLECTED	Russian Federation	NA	LANDRACE	41.8736	45.4249	0.083	0.412	0.244	0.072	0.189
2164	3	24	Saint_Paul_Field_2015	PI296472	2-row	H-2183	COLLECTED	Ethiopia	NA	LANDRACE	10.68	41.71	0.001	0.001	0.001	0.002	0.995	NAM Parent
2165	3	25	Saint_Paul_Field_2015	PI195320	2-row	2747	COLLECTED	Guatemala	Solola	LANDRACE	NA	NA	NA	NA	NA	NA	NA	Excluded from GWAS due to high amounts of missing SNP data or heterozygosity.
2166	3	26	Saint_Paul_Field_2015	PI643227	2-row	ND4856	DEVELOPED	United States	North Dakota	BREEDING	46.898	-100.736	0.002	0.002	0.631	0.363	0.002
2167	3	27	Saint_Paul_Field_2015	PI182645	2-row	Hakata No. 2	DEVELOPED	Japan	Fukuoka	CULTIVAR	33.5904	130.402	0.162	0.001	0.696	0.139	0.002
2168	3	28	Saint_Paul_Field_2015	PI371490	2-row	2134B	COLLECTED	Switzerland	Graubunden	LANDRACE	47.1029	8.88716	0.005	0.003	0.44	0.547	0.006	NAM Parent
2169	3	29	Saint_Paul_Field_2015	CIho3694	2-row	90b	COLLECTED	Egypt	Red Sea	LANDRACE	26.0667	34.1	0.514	0.232	0.054	0.015	0.184
2170	3	30	Saint_Paul_Field_2015	PI584766	2-row	Q21861	DEVELOPED	Australia	Western Australia	BREEDING	-27.6728	121.628	0.119	0.215	0.5	0.163	0.003
2171	3	31	Saint_Paul_Field_2015	PI392455	2-row	Welgevallen 65-56-80	DEVELOPED	South Africa	Cape Province	BREEDING	-28.7265	21.7546	0.209	0.031	0.707	0.035	0.019
2172	3	32	Saint_Paul_Field_2015	PI643364	2-row	ND22895	DEVELOPED	United States	North Dakota	BREEDING	47.6156	-101.444	0.004	0.003	0.564	0.427	0.002
2173	3	33	Saint_Paul_Field_2015	PI361609	2-row	Nue Grosse	COLLECTED	Denmark	NA	UNCERTAIN	56.2898	9.81111	0.052	0.731	0.113	0.032	0.072	NAM Parent
2174	3	34	Saint_Paul_Field_2015	CIho11587	2-row	Israel 49	COLLECTED	Israel	NA	CULTIVAR	31.1149	35.2393	0.541	0.223	0.071	0.011	0.153
2175	3	35	Saint_Paul_Field_2015	PI573682	2-row	SN-2092a	COLLECTED	Georgia	NA	LANDRACE	42.6403	45.1097	0.066	0.361	0.34	0.072	0.161
2176	3	36	Saint_Paul_Field_2015	CIho4622	6-row	CI 4622	COLLECTED	Japan	NA	UNCERTAIN	36.21	138.26	0.001	0.995	0.001	0.001	0.002
2177	3	37	Saint_Paul_Field_2015	CIho6092	6-row	C.A.N. 1105	DEVELOPED	Canada	Ontario	BREEDING	51.4038	85.4732	0.015	0.105	0.018	0.85	0.012
2178	3	38	Saint_Paul_Field_2015	PI390281	6-row	IV/1	COLLECTED	Macedonia	NA	LANDRACE	41.3397	20.6033	0.194	0.003	0.004	0.798	0.001	NAM Parent
2179	3	39	Saint_Paul_Field_2015	PI328052	6-row	Barley Minnesota 331	DEVELOPED	United States	Minnesota	CULTIVAR	46.7296	-94.6859	0.411	0.001	0.003	0.583	0.002	NAM Parent
2180	3	40	Saint_Paul_Field_2015	PI640096	6-row	TX02D313	DEVELOPED	United States	Texas	BREEDING	30.5471	-97.9209	0.244	0.085	0.003	0.666	0.002
2181	3	41	Saint_Paul_Field_2015	PI361930	6-row	Cluj 100/58	DEVELOPED	Romania	Cluj	BREEDING	46.765	23.628	0.136	0.003	0.015	0.845	0.001
2182	3	42	Saint_Paul_Field_2015	PI383031	6-row	GAW 99-4	COLLECTED	Ethiopia	Shewa	LANDRACE	8.68333	38.2333	0.001	0.001	0.001	0.001	0.996
2183	3	43	Saint_Paul_Field_2015	PI194951	6-row	9243	COLLECTED	Ethiopia	Gonder	LANDRACE	12.8941	37.7019	0.001	0.001	0.001	0.002	0.994
2184	3	44	Saint_Paul_Field_2015	PI264922	6-row	1051	COLLECTED	Croatia	Primorsko-goranska z	LANDRACE	45.4278	14.9111	0.347	0.005	0.003	0.644	0.001
2185	3	45	Saint_Paul_Field_2015	PI225019	6-row	Kairyo Bozu	DEVELOPED	Japan	Ehime	CULTIVAR	33.85	132.77	0.012	0.947	0.027	0.007	0.007
2186	3	46	Saint_Paul_Field_2015	PI244785	6-row	5029	COLLECTED	Afghanistan	Kabul	LANDRACE	34.5167	69.1833	0.101	0.628	0.24	0.007	0.025
2187	3	47	Saint_Paul_Field_2015	PI134636	6-row	CIho 6591	COLLECTED	Afghanistan	Kabul	LANDRACE	34.4231	69.3858	0.004	0.951	0.005	0.004	0.035
2188	3	48	Saint_Paul_Field_2015	CIho7153	6-row	36Ab2568	DEVELOPED	United States	Idaho	BREEDING	44.5327	-115.093	0.43	0.022	0.409	0.134	0.004	Secondary Check 1
2189	3	49	Saint_Paul_Field_2015	PI94875	6-row	329	COLLECTED	Russian Federation	Krasnodar	LANDRACE	45.3	40.9	0.96	0.004	0.011	0.017	0.007	NAM Parent
2190	3	50	Saint_Paul_Field_2015	CIho4095	6-row	CI 4095	COLLECTED	Georgia	NA	LANDRACE	41.7167	44.7833	0.009	0.364	0.341	0.15	0.136
2191	3	51	Saint_Paul_Field_2015	PI595789	6-row	88Ab536-B	DEVELOPED	United States	Idaho	BREEDING	43.9044	114.506	0.002	0.078	0.003	0.912	0.005
2192	3	52	Saint_Paul_Field_2015	CIho14222	6-row	4062	COLLECTED	Mongolia	NA	LANDRACE	47.1622	104.146	0.002	0.982	0.002	0.002	0.012
2193	3	53	Saint_Paul_Field_2015	CIho15349	6-row	Jebali	COLLECTED	Tunisia	Kebili	LANDRACE	NA	NA	NA	NA	NA	NA	NA	Excluded from GWAS due to high amounts of missing SNP data or heterozygosity. NAM Parent.
2194	3	54	Saint_Paul_Field_2015	PI434815	6-row	QB 714.6	DEVELOPED	Canada	Quebec	BREEDING	53.0792	-73.4147	0.003	0.002	0.057	0.935	0.003
2195	3	55	Saint_Paul_Field_2015	PI531986	6-row	2695	COLLECTED	Egypt	NA	UNCERTAIN	26.8193	30.9865	0.566	0.211	0.015	0.011	0.197	NAM Parent
2196	3	56	Saint_Paul_Field_2015	PI328577	6-row	HOR 1253	COLLECTED	Greece	Peloponnese	LANDRACE	36.5736	22.8727	0.982	0.005	0.004	0.005	0.003	NAM Parent
2197	3	57	Saint_Paul_Field_2015	PI135758	6-row	Jao Charpalu	COLLECTED	Afghanistan	Sar-e Pol	LANDRACE	35.9489	66.42	0.002	0.992	0.001	0.001	0.003	NAM Parent
2198	3	58	Saint_Paul_Field_2015	PI296459	6-row	H-2213	COLLECTED	Eritrea	NA	LANDRACE	14.6833	39.4167	0.991	0.002	0.002	0.002	0.003
2199	3	59	Saint_Paul_Field_2015	PI331895	6-row	HOR 1850	COLLECTED	Afghanistan	NA	LANDRACE	33.94	67.72	0.039	0.68	0.255	0.007	0.02
2200	3	60	Saint_Paul_Field_2015	PI640166	6-row	TX01D160	DEVELOPED	United States	Texas	BREEDING	30.2734	-98.1946	0.098	0.009	0.026	0.858	0.008
2201	3	61	Saint_Paul_Field_2015	PI392524	6-row	Welgevallen 62-19-2-15	DEVELOPED	South Africa	Cape Province	BREEDING	-34.304	19.908	0.734	0.002	0.257	0.005	0.002	NAM Parent
2202	3	62	Saint_Paul_Field_2015	PI467764	6-row	RD-216	DEVELOPED	India	Rajasthan	CULTIVAR	27.03	74.22	0.155	0.732	0.039	0.016	0.058
2203	3	63	Saint_Paul_Field_2015	PI447260	6-row	NA	DEVELOPED	Spain	Zaragoza	BREEDING	41.593	-0.894	0.993	0.002	0.002	0.002	0.002
2204	3	64	Saint_Paul_Field_2015	PI402416	6-row	MCU 3938	COLLECTED	Colombia	Cundinamarca	UNCERTAIN	4.96935	-73.7491	0.322	0.002	0.011	0.664	0.002
2205	3	65	Saint_Paul_Field_2015	PI328486	6-row	HOR 1131	COLLECTED	Greece	Crete	LANDRACE	35.4667	23.7833	0.981	0.003	0.003	0.004	0.01
2206	3	66	Saint_Paul_Field_2015	PI292016	6-row	Israeli 46	DEVELOPED	Israel	NA	CULTIVAR	32.724	35.298	0.93	0.025	0.016	0.017	0.012
2207	3	67	Saint_Paul_Field_2015	PI362207	6-row	Mars	DEVELOPED	France	Yvelines	CULTIVAR	48.7851	1.82565	0.51	0.004	0.118	0.35	0.018	NAM Parent
2208	3	68	Saint_Paul_Field_2015	PI371335	6-row	1970BA	COLLECTED	Switzerland	Graubunden	LANDRACE	NA	NA	NA	NA	NA	NA	NA	Excluded from GWAS due to high amounts of missing SNP data or heterozygosity.
2209	3	69	Saint_Paul_Field_2015	PI573615	6-row	WIR 3938	COLLECTED	Mongolia	NA	LANDRACE	46.4829	103.617	0.001	0.996	0.001	0.001	0.001	NAM Parent
2210	3	70	Saint_Paul_Field_2015	PI640259	6-row	TX01D256	DEVELOPED	United States	Texas	BREEDING	30.3273	-98.1407	0.238	0.003	0.003	0.754	0.002
2211	4	70	Saint_Paul_Field_2015	PI64022	6-row	CIho 4207	COLLECTED	Uzbekistan	Tashkent	LANDRACE	NA	NA	NA	NA	NA	NA	NA	Excluded from GWAS due to high amounts of missing SNP data or heterozygosity. NAM Parent. Replaced line that did not flower in 2014.
2212	4	69	Saint_Paul_Field_2015	PI87836	6-row	Harumaki Zarai Shu	COLLECTED	Korea, North	Pyongan Nam	LANDRACE	39.9805	125.992	0.003	0.439	0.001	0.555	0.002
2213	4	68	Saint_Paul_Field_2015	CIho14239	6-row	4055	COLLECTED	Mongolia	NA	LANDRACE	46.9125	103.897	0.001	0.995	0.001	0.001	0.001
2214	4	67	Saint_Paul_Field_2015	CIho6546	6-row	Tystofte	DEVELOPED	Denmark	NA	CULTIVAR	55.9941	9.1901	0.002	0.001	0.005	0.988	0.004
2215	4	66	Saint_Paul_Field_2015	CIho7153	6-row	36Ab2568	DEVELOPED	United States	Idaho	BREEDING	44.5327	-115.093	0.43	0.022	0.409	0.134	0.004	Secondary Check 1
2216	4	65	Saint_Paul_Field_2015	CIho15575	6-row	QB 136.34	DEVELOPED	Canada	Quebec	BREEDING	53.2244	-73.2696	0.005	0.007	0.005	0.739	0.244
2217	4	64	Saint_Paul_Field_2015	CIho14061	6-row	Bonfarik	COLLECTED	Algeria	NA	UNCERTAIN	34.5	7.32	0.988	0.002	0.003	0.005	0.002
2218	4	63	Saint_Paul_Field_2015	PI640339	6-row	TX01D336	DEVELOPED	United States	Texas	BREEDING	32.5006	-97.5864	0.088	0.24	0.002	0.666	0.004
2219	4	62	Saint_Paul_Field_2015	PI87800	6-row	Makishu	COLLECTED	Korea, South	Kyongsang Puk	LANDRACE	36.3333	128.75	0.002	0.517	0.002	0.477	0.001
2220	4	61	Saint_Paul_Field_2015	PI264213	6-row	Saida 183	COLLECTED	Algeria	NA	CULTIVAR	35.83	1.6	0.952	0.002	0.009	0.033	0.004
2221	4	60	Saint_Paul_Field_2015	PI574094	6-row	RNB-379	COLLECTED	Nepal	Mechi	LANDRACE	27.0369	88.223	0.143	0.804	0.005	0.041	0.007	NAM Parent
2222	4	59	Saint_Paul_Field_2015	PI54916	6-row	Maskin Cyg	DEVELOPED	Norway	NA	CULTIVAR	61.178	9.981	0.002	0.001	0.003	0.991	0.002
2223	4	58	Saint_Paul_Field_2015	PI640265	6-row	TX01D262	DEVELOPED	United States	Texas	BREEDING	30.5285	-97.9395	0.173	0.133	0.003	0.687	0.005	NAM Parent
2224	4	57	Saint_Paul_Field_2015	PI564649	6-row	7022	COLLECTED	Oman	NA	LANDRACE	23.1667	57.3333	0.966	0.008	0.017	0.006	0.003
2225	4	56	Saint_Paul_Field_2015	PI640174	6-row	TX01D168	DEVELOPED	United States	Texas	BREEDING	30.3035	-98.1645	0.176	0.009	0.003	0.807	0.005
2226	4	55	Saint_Paul_Field_2015	CIho16152	6-row	Isogenic: Powdery Mildew Sus (mla6)	DEVELOPED	United States	Maryland	GENETIC	39.0458	76.6413	0.03	0.039	0.012	0.906	0.014
2227	4	54	Saint_Paul_Field_2015	PI584786	6-row	GSM-11	COLLECTED	Iraq	NA	LANDRACE	33.2232	43.6793	0.553	0.172	0.085	0.013	0.178	NAM Parent
2228	4	53	Saint_Paul_Field_2015	PI328729	6-row	HOR 1791	COLLECTED	Afghanistan	NA	LANDRACE	33.9391	67.71	0.406	0.002	0.302	0.283	0.006
2229	4	52	Saint_Paul_Field_2015	CIho2367	6-row	Khartum	COLLECTED	Sudan	Khartoum	UNCERTAIN	15.6618	32.8711	0.994	0.001	0.001	0.002	0.001	NAM Parent
2230	4	51	Saint_Paul_Field_2015	CIho4264	6-row	CI 4264	COLLECTED	Venezuela	NA	UNCERTAIN	6.42375	-66.5897	0.993	0.001	0.002	0.003	0.001	NAM Parent. Replaced line that did not flower in 2014.
2231	4	50	Saint_Paul_Field_2015	PI247928	6-row	NA	COLLECTED	Cyprus	NA	LANDRACE	35.0381	33.2445	0.043	0.217	0.127	0.606	0.007
2232	4	49	Saint_Paul_Field_2015	PI422225	6-row	NA	COLLECTED	Yemen	NA	LANDRACE	15.1051	44.4323	0.201	0.014	0.053	0.518	0.214
2233	4	48	Saint_Paul_Field_2015	PI193799	6-row	8853	COLLECTED	Ethiopia	Shewa	LANDRACE	9.03333	38.7	0.001	0.001	0.001	0.001	0.996
2234	4	47	Saint_Paul_Field_2015	CIho15624	6-row	Perth	DEVELOPED	Canada	Ontario	CULTIVAR	51.3538	85.4232	0.006	0.008	0.129	0.773	0.084
2235	4	46	Saint_Paul_Field_2015	PI449279	6-row	3997	DEVELOPED	Spain	Zaragoza	BREEDING	41.7088	-0.704016	0.353	0.002	0.365	0.278	0.002	NAM Parent
2236	4	45	Saint_Paul_Field_2015	PI467797	6-row	Attiki	DEVELOPED	Greece	Macedonia	CULTIVAR	41.6916	22.2445	0.911	0.039	0.007	0.038	0.004
2237	4	44	Saint_Paul_Field_2015	PI640234	6-row	TX01D230	DEVELOPED	United States	Texas	BREEDING	NA	NA	NA	NA	NA	NA	NA	Excluded from GWAS due to high amounts of missing SNP data or heterozygosity.
2238	4	43	Saint_Paul_Field_2015	CIho2542	6-row	Bari	COLLECTED	Italy	Apulia	CULTIVAR	41.25	16.25	0.803	0.01	0.005	0.165	0.018	NAM Parent
2239	4	42	Saint_Paul_Field_2015	PI328728	6-row	HOR 1790	COLLECTED	Afghanistan	NA	LANDRACE	33.9491	67.72	0.001	0.992	0.002	0.002	0.003
2240	4	41	Saint_Paul_Field_2015	PI140278	6-row	CIho 6902	COLLECTED	Afghanistan	Bamian	LANDRACE	34.8167	67.8167	0.003	0.988	0.002	0.002	0.004
2241	4	40	Saint_Paul_Field_2015	PI87840	6-row	Borinor	COLLECTED	Korea, North	Pyongan Nam	LANDRACE	39.9746	126.2	0.003	0.268	0.003	0.724	0.002
2242	4	39	Saint_Paul_Field_2015	PI95265	6-row	278	COLLECTED	Unknown	NA	LANDRACE	NA	NA	0.002	0.001	0.004	0.991	0.002
2243	4	38	Saint_Paul_Field_2015	PI611139	6-row	Niska	DEVELOPED	Canada	Alberta	CULTIVAR	53.9315	-117	0.089	0.032	0.296	0.492	0.09
2244	4	37	Saint_Paul_Field_2015	PI290322	6-row	Hatvani 445	DEVELOPED	Hungary	Heves	CULTIVAR	47.7258	20.1239	0.143	0.003	0.241	0.611	0.002
2245	4	36	Saint_Paul_Field_2015	CIho4184	6-row	Abi Jou	COLLECTED	Afghanistan	Takhar	LANDRACE	35.7344	69.5392	0.001	0.992	0.004	0.002	0.001	NAM Parent
2246	4	35	Saint_Paul_Field_2015	PI344940	2-row	72A	COLLECTED	Bosnia and Herzegovina	NA	LANDRACE	43.742	18.6743	0.003	0.005	0.513	0.357	0.122
2247	4	34	Saint_Paul_Field_2015	PI643307	2-row	ND16680	DEVELOPED	United States	North Dakota	BREEDING	47.3763	-100.757	0.091	0.008	0.446	0.392	0.064
2248	4	33	Saint_Paul_Field_2015	PI283464	2-row	Korai Tak Arpa	COLLECTED	Hungary	NA	CULTIVAR	46.7719	19.1136	0.004	0.003	0.785	0.202	0.006	NAM Parent
2249	4	32	Saint_Paul_Field_2015	PI342283	2-row	2560	COLLECTED	Turkey	Kutahya	LANDRACE	38.8739	29.7797	0.086	0.138	0.533	0.132	0.11	NAM Parent
2250	4	31	Saint_Paul_Field_2015	PI374429	2-row	29/71-42/3	COLLECTED	Serbia	NA	LANDRACE	43.2872	20.6153	0.008	0.104	0.809	0.076	0.003	NAM Parent
2251	4	30	Saint_Paul_Field_2015	PI343725	2-row	Crusader	DEVELOPED	Netherlands	Groningen	CULTIVAR	53.317	6.609	0.002	0.001	0.993	0.002	0.002
2252	4	29	Saint_Paul_Field_2015	PI94790	2-row	308	COLLECTED	Georgia	NA	LANDRACE	42.4748	43.5163	0.16	0.116	0.38	0.179	0.165	NAM Parent
2253	4	28	Saint_Paul_Field_2015	PI371338	2-row	1970BD	COLLECTED	Switzerland	Graubunden	LANDRACE	46.2155	8.96481	0.002	0.003	0.471	0.509	0.014
2254	4	27	Saint_Paul_Field_2015	PI392470	2-row	Welgevallen 65-31-61	DEVELOPED	South Africa	Cape Province	BREEDING	-33.153	20.249	0.341	0.003	0.642	0.012	0.002
2255	4	26	Saint_Paul_Field_2015	PI392521	2-row	Welgevallen 62-13-32	DEVELOPED	South Africa	Cape Province	BREEDING	-29.1071	21.9344	0.532	0.005	0.449	0.011	0.003
2256	4	25	Saint_Paul_Field_2015	PI643370	2-row	ND23146	DEVELOPED	United States	North Dakota	BREEDING	47.1168	-101.363	0.004	0.062	0.502	0.356	0.075
2257	4	24	Saint_Paul_Field_2015	PI429312	2-row	NA	COLLECTED	Yemen	NA	LANDRACE	13.1678	44.1789	0.211	0.016	0.026	0.006	0.74
2258	4	23	Saint_Paul_Field_2015	CIho6371	2-row	S.D. 1344	DEVELOPED	United States	South Dakota	BREEDING	43.9695	-99.9018	0.028	0.034	0.615	0.317	0.007
2259	4	22	Saint_Paul_Field_2015	PI643294	2-row	ND15443	DEVELOPED	United States	North Dakota	BREEDING	47.8358	-101.32	0.156	0.01	0.277	0.299	0.258
2260	4	21	Saint_Paul_Field_2015	PI402401	2-row	MCU 3923	COLLECTED	Colombia	Cundinamarca	UNCERTAIN	5.32086	-74.4768	0.42	0.002	0.372	0.204	0.003	NAM Parent
2261	4	20	Saint_Paul_Field_2015	PI584962	2-row	Mi Mai 114	COLLECTED	China	Zhejiang	LANDRACE	28.6904	119.977	0.013	0.359	0.475	0.147	0.006	Secondary Check 2
2262	4	19	Saint_Paul_Field_2015	PI467808	2-row	Perfekta	DEVELOPED	Austria	NA	CULTIVAR	47.251	14.387	0.002	0.001	0.992	0.002	0.003
2263	4	18	Saint_Paul_Field_2015	PI399503	2-row	Multum	DEVELOPED	Austria	NA	CULTIVAR	47.808	14.717	0.03	0.001	0.965	0.002	0.002
2264	4	17	Saint_Paul_Field_2015	PI428497	2-row	Roxane	DEVELOPED	France	Yvelines	CULTIVAR	48.537	1.214	0.065	0.002	0.902	0.021	0.01
2265	4	16	Saint_Paul_Field_2015	PI195319	2-row	2744	COLLECTED	Guatemala	Suchitepequez	LANDRACE	14.5333	-91.5	0.454	0.432	0.017	0.01	0.087
2266	4	15	Saint_Paul_Field_2015	PI643247	2-row	ND8763	DEVELOPED	United States	North Dakota	BREEDING	46.385	-101.79	0.007	0.003	0.681	0.306	0.003
2267	4	14	Saint_Paul_Field_2015	PI344936	2-row	70A	COLLECTED	Bosnia and Herzegovina	NA	LANDRACE	43.5	18.7667	0.007	0.005	0.759	0.227	0.003
2268	4	13	Saint_Paul_Field_2015	CIho15616	2-row	LT 74G6	DEVELOPED	Canada	Quebec	BREEDING	51.798	-73.147	0.014	0.001	0.981	0.003	0.001
2269	4	12	Saint_Paul_Field_2015	PI350713	2-row	69Z108.177	COLLECTED	Austria	Carinthia	LANDRACE	47.0167	13.6167	0.005	0.003	0.355	0.632	0.006	NAM Parent
2270	4	11	Saint_Paul_Field_2015	PI485524	2-row	Cerise	DEVELOPED	United Kingdom	England	CULTIVAR	53.005	-0.792	0.143	0.002	0.825	0.006	0.024
2271	4	10	Saint_Paul_Field_2015	CIho9143	2-row	CI 9143	COLLECTED	Austria	NA	UNCERTAIN	48.453	16.31	0.003	0.002	0.889	0.105	0.001
2272	4	9	Saint_Paul_Field_2015	PI344729	2-row	68-28295	DEVELOPED	Argentina	Buenos Aires	BREEDING	-34.787	-59.065	0.139	0.002	0.854	0.003	0.002
2273	4	8	Saint_Paul_Field_2015	PI392499	2-row	Welgevallen 65-56-21	DEVELOPED	South Africa	Cape Province	BREEDING	NA	NA	NA	NA	NA	NA	NA	Excluded from GWAS due to high amounts of missing SNP data or heterozygosity.
2274	4	7	Saint_Paul_Field_2015	PI371320	2-row	1948G	COLLECTED	Switzerland	Uri	LANDRACE	46.2792	8.91349	0.006	0.008	0.52	0.459	0.008
2275	4	6	Saint_Paul_Field_2015	PI599628	2-row	Horal	DEVELOPED	Slovakia	NA	CULTIVAR	48.118	18.398	0.024	0.002	0.969	0.003	0.003
2276	4	5	Saint_Paul_Field_2015	PI599637	2-row	Malvaz	DEVELOPED	Czech Republic	NA	CULTIVAR	49.585	12.823	0.075	0.009	0.785	0.003	0.129	NAM Parent
2277	4	4	Saint_Paul_Field_2015	PI244041	2-row	CIho 10727	COLLECTED	Yemen	NA	LANDRACE	13.9667	44.1833	0.109	0.441	0.063	0.021	0.365
2278	4	3	Saint_Paul_Field_2015	PI306444	2-row	Cluj 123	DEVELOPED	Romania	NA	CULTIVAR	45.068	27.441	0.004	0.089	0.679	0.225	0.004
2279	4	2	Saint_Paul_Field_2015	PI564487	2-row	Alexis	DEVELOPED	Germany	Bavaria	CULTIVAR	49.892	10.443	0.007	0.004	0.868	0.003	0.118	NAM Parent
2280	4	1	Saint_Paul_Field_2015	PI57099	2-row	CIho 3349	COLLECTED	Georgia	NA	LANDRACE	42.4169	43.4584	0.023	0.411	0.437	0.013	0.116	NAM Parent
2281	5	1	Saint_Paul_Field_2015	PI328742	2-row	Loosdorfer Fruhe Zaya	DEVELOPED	Austria	Lower Austria	CULTIVAR	48.1081	15.8049	0.001	0.002	0.985	0.009	0.002	NAM Parent
2282	5	2	Saint_Paul_Field_2015	CIho11588	2-row	Israel 264	COLLECTED	Israel	NA	CULTIVAR	30.8638	34.4927	0.574	0.248	0.014	0.017	0.146	NAM Parent
2283	5	3	Saint_Paul_Field_2015	Conlon	2-row	Conlon	DEVELOPED	United States	South Dakota	CULTIVAR	NA	NA	NA	NA	NA	NA	NA	Primary Check
2284	5	4	Saint_Paul_Field_2015	PI226639	2-row	14728	COLLECTED	Iran	Fars	LANDRACE	29.6333	51.7333	0.199	0.353	0.299	0.009	0.14
2285	5	5	Saint_Paul_Field_2015	PI156658	2-row	231.37	DEVELOPED	Russian Federation	Irkutsk	BREEDING	52.337	104.355	0.002	0.004	0.362	0.629	0.003
2286	5	6	Saint_Paul_Field_2015	PI599640	2-row	Heran	DEVELOPED	Czech Republic	NA	CULTIVAR	49.954	16.306	0.003	0.043	0.876	0.002	0.076
2287	5	7	Saint_Paul_Field_2015	PI344727	2-row	68-10916	DEVELOPED	Argentina	Buenos Aires	BREEDING	-34.439	-59.208	0.222	0.007	0.751	0.01	0.01
2288	5	8	Saint_Paul_Field_2015	Conlon	2-row	Conlon	DEVELOPED	United States	South Dakota	CULTIVAR	NA	NA	NA	NA	NA	NA	NA	Primary Check
2289	5	9	Saint_Paul_Field_2015	PI467849	2-row	FM 437	DEVELOPED	Brazil	Rio Grande do Sul	CULTIVAR	-28.53	-54.692	0.005	0.002	0.633	0.358	0.002	NAM Parent
2290	5	10	Saint_Paul_Field_2015	CIho13135	2-row	Haisa	DEVELOPED	Germany	Lower Saxony	CULTIVAR	52.919	9.557	0.001	0.001	0.996	0.001	0.001	NAM Parent
2291	5	11	Saint_Paul_Field_2015	PI371100	2-row	1065B	COLLECTED	Switzerland	Valais	LANDRACE	46.2987	7.86778	0.017	0.013	0.626	0.319	0.025
2292	5	12	Saint_Paul_Field_2015	PI392478	2-row	Welgevallen 60-13-1	DEVELOPED	South Africa	Cape Province	BREEDING	-33.538	20.117	0.605	0.005	0.38	0.008	0.002	NAM Parent
2293	5	13	Saint_Paul_Field_2015	Conlon	2-row	Conlon	DEVELOPED	United States	South Dakota	CULTIVAR	NA	NA	NA	NA	NA	NA	NA	Primary Check
2294	5	14	Saint_Paul_Field_2015	PI506302	2-row	RPB 715-69	DEVELOPED	United Kingdom	England	BREEDING	52.727	-1.517	0.13	0.002	0.862	0.003	0.003	NAM Parent
2295	5	15	Saint_Paul_Field_2015	PI606305	2-row	15022	COLLECTED	Saudi Arabia	NA	LANDRACE	18.2333	42.5167	0.167	0.052	0.068	0.029	0.684
2296	5	16	Saint_Paul_Field_2015	PI467836	2-row	Lubuski	DEVELOPED	Poland	NA	CULTIVAR	53.499	17.306	0.002	0.001	0.987	0.007	0.002
2297	5	17	Saint_Paul_Field_2015	PI382275	2-row	GAW 66-3	COLLECTED	Ethiopia	Tigre	LANDRACE	14.3167	39.2333	0.001	0.001	0.001	0.001	0.996
2298	5	18	Saint_Paul_Field_2015	Conlon	2-row	Conlon	DEVELOPED	United States	South Dakota	CULTIVAR	NA	NA	NA	NA	NA	NA	NA	Primary Check
2299	5	19	Saint_Paul_Field_2015	CIho14394	2-row	CI 14394	COLLECTED	Armenia	NA	LANDRACE	40.1191	45.0882	0.109	0.237	0.532	0.01	0.112	NAM Parent
2300	5	20	Saint_Paul_Field_2015	PI392461	2-row	Welgevallen 60-22-4	DEVELOPED	South Africa	Cape Province	BREEDING	-29.3731	21.9466	0.44	0.005	0.546	0.006	0.002
2301	5	21	Saint_Paul_Field_2015	PI346390	2-row	Mutant ERT 1A	DEVELOPED	Argentina	Buenos Aires	BREEDING	-34.612	-58.389	0.095	0.002	0.895	0.004	0.004
2302	5	22	Saint_Paul_Field_2015	PI592267	2-row	Findhorn	DEVELOPED	United Kingdom	Scotland	CULTIVAR	56.96	-4.63	0.001	0.001	0.993	0.004	0.001	NAM Parent
2303	5	23	Saint_Paul_Field_2015	Conlon	2-row	Conlon	DEVELOPED	United States	South Dakota	CULTIVAR	NA	NA	NA	NA	NA	NA	NA	Primary Check
2304	5	24	Saint_Paul_Field_2015	PI564502	2-row	Nusta	DEVELOPED	Bolivia	NA	CULTIVAR	-15.41	-66.36	0.001	0.002	0.001	0.001	0.995
2305	5	25	Saint_Paul_Field_2015	CIho16671	2-row	Isogenic: 2-Row Small Lateral Club Head	DEVELOPED	United States	Montana	GENETIC	46.9666	-109.938	0.395	0.008	0.374	0.213	0.009
2306	5	26	Saint_Paul_Field_2015	PI392484	2-row	Welgevallen 65-55-3	DEVELOPED	South Africa	Cape Province	BREEDING	-31.875	18.425	0.32	0.001	0.674	0.003	0.002	NAM Parent
2307	5	27	Saint_Paul_Field_2015	PI614939	2-row	Heris	DEVELOPED	Czech Republic	South Moravia	CULTIVAR	48.994	16.847	0.036	0.06	0.819	0.004	0.08
2308	5	28	Saint_Paul_Field_2015	Conlon	2-row	Conlon	DEVELOPED	United States	South Dakota	CULTIVAR	NA	NA	NA	NA	NA	NA	NA	Primary Check
2309	5	29	Saint_Paul_Field_2015	PI392435	2-row	Welgevallen 60-1-3	DEVELOPED	South Africa	Cape Province	BREEDING	-31.594	18.755	0.345	0.002	0.635	0.014	0.004
2310	5	30	Saint_Paul_Field_2015	PI592196	2-row	Jem	DEVELOPED	United Kingdom	NA	CULTIVAR	54.48	-1.85	0.004	0.009	0.89	0.004	0.093
2311	5	31	Saint_Paul_Field_2015	PI250861	2-row	K1679	COLLECTED	Iran	Khorasan	LANDRACE	36.3	59.6	0.189	0.333	0.265	0.005	0.208
2312	5	32	Saint_Paul_Field_2015	PI392423	2-row	Welgevallen 65-56-20	DEVELOPED	South Africa	Cape Province	BREEDING	-32.803	21.523	0.009	0.003	0.779	0.203	0.006	NAM Parent
2313	5	33	Saint_Paul_Field_2015	Conlon	2-row	Conlon	DEVELOPED	United States	South Dakota	CULTIVAR	NA	NA	NA	NA	NA	NA	NA	Primary Check
2314	5	34	Saint_Paul_Field_2015	PI467739	2-row	America	DEVELOPED	Mexico	NA	CULTIVAR	25.8	-104.45	0.317	0.025	0.025	0.063	0.571
2315	5	35	Saint_Paul_Field_2015	PI643362	2-row	ND22182	DEVELOPED	United States	North Dakota	BREEDING	47.6485	-101.434	0.041	0.039	0.509	0.408	0.003
2316	5	36	Saint_Paul_Field_2015	PI95278	6-row	485/1989	COLLECTED	Unknown	NA	LANDRACE	NA	NA	0.001	0.001	0.001	0.001	0.997
2317	5	37	Saint_Paul_Field_2015	PI281525	6-row	Buenos Aires 109	DEVELOPED	Argentina	Buenos Aires	CULTIVAR	-34.5801	-58.416	0.6	0.003	0.061	0.332	0.004
2318	5	38	Saint_Paul_Field_2015	Rasmussen	6-row	Rasmussen	DEVELOPED	United States	South Dakota	CULTIVAR	NA	NA	NA	NA	NA	NA	NA	Primary Check
2319	5	39	Saint_Paul_Field_2015	CIho14319	6-row	CI 14319	DONATED	Denmark	Storstrom	UNCERTAIN	54.988	11.885	0.002	0.001	0.006	0.99	0.001	NAM Parent
2320	5	40	Saint_Paul_Field_2015	PI640117	6-row	TX01D108	DEVELOPED	United States	Texas	BREEDING	31.567	-100.398	0.357	0.122	0.052	0.111	0.357	NAM Parent
2321	5	41	Saint_Paul_Field_2015	PI640154	6-row	TX01D148	DEVELOPED	United States	Texas	BREEDING	31.6108	-99.6295	0.439	0.107	0.021	0.429	0.003
2322	5	42	Saint_Paul_Field_2015	PI467733	6-row	Varde	DEVELOPED	Norway	NA	CULTIVAR	60.572	8.5689	0.001	0.001	0.002	0.995	0.001	NAM Parent
2323	5	43	Saint_Paul_Field_2015	Rasmussen	6-row	Rasmussen	DEVELOPED	United States	South Dakota	CULTIVAR	NA	NA	NA	NA	NA	NA	NA	Primary Check
2324	5	44	Saint_Paul_Field_2015	PI157884	6-row	Orazio	DEVELOPED	Italy	Emilia-Romagna	CULTIVAR	44.5968	11.2186	0.981	0.005	0.007	0.001	0.005	NAM Parent. Replaced line that did not flower in 2014.
2325	5	45	Saint_Paul_Field_2015	PI532000	6-row	2744	COLLECTED	Egypt	NA	UNCERTAIN	26.5851	30.3567	0.533	0.188	0.006	0.004	0.268
2326	5	46	Saint_Paul_Field_2015	CIho2353	6-row	Moiris	COLLECTED	Turkmenistan	Mary	UNCERTAIN	37.5909	62.1077	0.002	0.991	0.002	0.003	0.002
2327	5	47	Saint_Paul_Field_2015	PI290306	6-row	Szekacs Tak	DEVELOPED	Hungary	NA	CULTIVAR	46.944	20.932	0.088	0.002	0.439	0.467	0.003
2328	5	48	Saint_Paul_Field_2015	Rasmussen	6-row	Rasmussen	DEVELOPED	United States	South Dakota	CULTIVAR	NA	NA	NA	NA	NA	NA	NA	Primary Check
2329	5	49	Saint_Paul_Field_2015	PI283456	6-row	Orge 628	DEVELOPED	Morocco	NA	CULTIVAR	33.4637	-3.65499	0.875	0.006	0.014	0.077	0.028
2330	5	50	Saint_Paul_Field_2015	PI447100	6-row	NA	COLLECTED	Spain	Zaragoza	UNCERTAIN	41.4833	-1.36667	0.926	0.002	0.013	0.053	0.006	NAM Parent
2331	5	51	Saint_Paul_Field_2015	PI438585	2-row	W-C 2440	COLLECTED	Guatemala	Guatemala	LANDRACE	14.6333	-90.5167	0.536	0.427	0.011	0.007	0.019	Planted with 6-row lines but looked 2-row in field. Categorized as 6-row in GrainGenes and Muñoz-Amatriaín et al. 2014, but categorized as 2-row in GRIN.
2332	5	52	Saint_Paul_Field_2015	CIho3388	6-row	Carre 48	COLLECTED	Algeria	NA	UNCERTAIN	31.63	1.65	0.975	0.003	0.003	0.014	0.005
2333	5	53	Saint_Paul_Field_2015	Rasmussen	6-row	Rasmussen	DEVELOPED	United States	South Dakota	CULTIVAR	NA	NA	NA	NA	NA	NA	NA	Primary Check
2334	5	54	Saint_Paul_Field_2015	PI434738	6-row	QB 701.7	DEVELOPED	Canada	Quebec	BREEDING	53.1003	-73.3936	0.005	0.008	0.005	0.78	0.202
2335	5	55	Saint_Paul_Field_2015	PI316874	6-row	S 7244	COLLECTED	Ethiopia	NA	LANDRACE	10.88	38.15	0.009	0.041	0.003	0.003	0.943
2336	5	56	Saint_Paul_Field_2015	PI640343	6-row	TX01D340	DEVELOPED	United States	Texas	BREEDING	30.07	-98.398	0.018	0.086	0.016	0.872	0.008
2337	5	57	Saint_Paul_Field_2015	PI327967	6-row	Olli	DEVELOPED	Finland	NA	CULTIVAR	61.9367	25.7608	0.002	0.001	0.002	0.994	0.002
2338	5	58	Saint_Paul_Field_2015	Rasmussen	6-row	Rasmussen	DEVELOPED	United States	South Dakota	CULTIVAR	NA	NA	NA	NA	NA	NA	NA	Primary Check
2339	5	59	Saint_Paul_Field_2015	PI181102	6-row	10596	COLLECTED	India	Himachal Pradesh	LANDRACE	32.5833	77	0.019	0.974	0.002	0.002	0.003	NAM Parent. Replaced line that did not flower in 2014.
2340	5	60	Saint_Paul_Field_2015	PI525185	6-row	Arra	DEVELOPED	Finland	NA	CULTIVAR	62.0131	26.0808	0.002	0.001	0.002	0.994	0.001
2341	5	61	Saint_Paul_Field_2015	PI640161	6-row	TX01D155	DEVELOPED	United States	Texas	BREEDING	30.5685	-97.8995	0.136	0.07	0.051	0.736	0.008
2342	5	62	Saint_Paul_Field_2015	PI386650	6-row	IAR/B/239-1	COLLECTED	Ethiopia	Gonder	LANDRACE	13.15	37.9	0.001	0.001	0.001	0.001	0.997	NAM Parent
2343	5	63	Saint_Paul_Field_2015	Rasmussen	6-row	Rasmussen	DEVELOPED	United States	South Dakota	CULTIVAR	NA	NA	NA	NA	NA	NA	NA	Primary Check
2344	5	64	Saint_Paul_Field_2015	PI640346	6-row	TX01D343	DEVELOPED	United States	Texas	BREEDING	30.6143	-97.8537	0.061	0.203	0.005	0.729	0.003
2345	5	65	Saint_Paul_Field_2015	PI401963	6-row	MCU 3485	COLLECTED	Colombia	Cundinamarca	UNCERTAIN	5.36014	-74.5451	0.408	0.003	0.004	0.377	0.207
2346	5	66	Saint_Paul_Field_2015	PI366450	6-row	383	COLLECTED	Afghanistan	Badghis	LANDRACE	34.8667	63.0833	0.002	0.987	0.002	0.001	0.007
2347	5	67	Saint_Paul_Field_2015	PI467738	6-row	Porvenir	DEVELOPED	Mexico	NA	CULTIVAR	23.4136	-102.477	0.53	0.002	0.087	0.374	0.008
2348	5	68	Saint_Paul_Field_2015	Rasmussen	6-row	Rasmussen	DEVELOPED	United States	South Dakota	CULTIVAR	NA	NA	NA	NA	NA	NA	NA	Primary Check
2349	5	69	Saint_Paul_Field_2015	PI270722	6-row	124	COLLECTED	Peru	Puno	LANDRACE	-16.3212	-69.9515	0.994	0.001	0.001	0.001	0.002
2350	5	70	Saint_Paul_Field_2015	PI87838	6-row	Karu Bori	COLLECTED	Korea, North	Pyongan Nam	LANDRACE	39.9221	126.718	0.005	0.44	0.003	0.548	0.004
2351	6	70	Saint_Paul_Field_2015	PI327860	6-row	HOR 4182	COLLECTED	Turkmenistan	NA	LANDRACE	39.1671	59.3986	0.002	0.99	0.002	0.005	0.002	Secondary Check 2
2352	6	69	Saint_Paul_Field_2015	PI119925	6-row	Cebada Paraguay	COLLECTED	Paraguay	Asuncion	UNCERTAIN	-25.2667	-57.6667	0.979	0.003	0.005	0.008	0.004	NAM Parent
2353	6	68	Saint_Paul_Field_2015	PI295581	6-row	ELS 6302-213	COLLECTED	Ethiopia	Shewa	LANDRACE	7.2	38.6	0.001	0.001	0.001	0.001	0.997
2354	6	67	Saint_Paul_Field_2015	PI428411	6-row	Zoapila	DEVELOPED	Mexico	Federal District	CULTIVAR	19.376	-99.086	0.18	0.019	0.013	0.784	0.003	NAM Parent
2355	6	66	Saint_Paul_Field_2015	PI356580	6-row	E 508/3	COLLECTED	Ethiopia	NA	LANDRACE	9.395	40.7397	0.003	0.001	0.001	0.001	0.994
2356	6	65	Saint_Paul_Field_2015	PI190711	6-row	Taiju Omugi	COLLECTED	Japan	Hokkaido	LANDRACE	40.7167	142.5	0.001	0.001	0.002	0.995	0.001	NAM Parent
2357	6	64	Saint_Paul_Field_2015	PI467737	6-row	Apam	DEVELOPED	Mexico	Federal District	CULTIVAR	19.4826	-99.1832	0.17	0.006	0.098	0.724	0.002
2358	6	63	Saint_Paul_Field_2015	PI422571	6-row	Gipsy	DEVELOPED	Belgium	Namur	CULTIVAR	50.478	4.8287	0.143	0.011	0.574	0.268	0.003
2359	6	62	Saint_Paul_Field_2015	PI356763	6-row	MOR 17/5	COLLECTED	Morocco	NA	LANDRACE	28.736	-10.459	0.993	0.002	0.001	0.002	0.001
2360	6	61	Saint_Paul_Field_2015	PI295960	6-row	NB 5	COLLECTED	Israel	NA	CULTIVAR	32.3995	35.2106	0.814	0.14	0.021	0.022	0.004
2361	6	60	Saint_Paul_Field_2015	PI327617	6-row	Hatvani 445	DEVELOPED	Hungary	Heves	CULTIVAR	47.8058	20.2039	0.16	0.003	0.091	0.743	0.003
2362	6	59	Saint_Paul_Field_2015	PI383136	6-row	GAW 141-2	COLLECTED	Ethiopia	Shewa	LANDRACE	8.28333	39.4167	0.001	0.001	0.001	0.001	0.996
2363	6	58	Saint_Paul_Field_2015	PI467743	6-row	Ensenada	DEVELOPED	Mexico	NA	CULTIVAR	23.348	-102.417	0.349	0.002	0.011	0.562	0.075
2364	6	57	Saint_Paul_Field_2015	PI290336	6-row	Hatvani 21/1	DEVELOPED	Hungary	Heves	CULTIVAR	47.9058	20.3039	0.225	0.007	0.134	0.632	0.002
2365	6	56	Saint_Paul_Field_2015	PI285124	6-row	S-42	COLLECTED	Ethiopia	Shewa	LANDRACE	9.68333	39.5333	0.001	0.001	0.001	0.001	0.997
2366	6	55	Saint_Paul_Field_2015	PI401964	6-row	MCU 3486	COLLECTED	Colombia	Cundinamarca	UNCERTAIN	5.32491	-74.4913	0.346	0.002	0.006	0.644	0.002	NAM Parent
2367	6	54	Saint_Paul_Field_2015	PI69421	6-row	6995	COLLECTED	China	Hebei	LANDRACE	NA	NA	NA	NA	NA	NA	NA	Excluded from GWAS due to high amounts of missing SNP data or heterozygosity. NAM Parent.
2368	6	53	Saint_Paul_Field_2015	PI39590	6-row	Cheliff	COLLECTED	Algeria	Mascara	LANDRACE	36.0333	0.133333	0.991	0.002	0.002	0.004	0.002	NAM Parent
2369	6	52	Saint_Paul_Field_2015	CIho2543	6-row	Orzo Collesano 1921	DEVELOPED	Italy	Apulia	BREEDING	40.849	17.134	0.986	0.002	0.002	0.009	0.001
2370	6	51	Saint_Paul_Field_2015	PI382860	6-row	GAW 48-12	COLLECTED	Ethiopia	Gonder	LANDRACE	12.7833	37.65	0.001	0.001	0.001	0.001	0.996	NAM Parent
2371	6	50	Saint_Paul_Field_2015	PI48133	6-row	California Feed	COLLECTED	Australia	Victoria	UNCERTAIN	-34.25	141.5	0.993	0.002	0.001	0.002	0.002	NAM Parent
2372	6	49	Saint_Paul_Field_2015	PI289811	6-row	32b	COLLECTED	Iran	Khuzestan	LANDRACE	32.1942	48.2436	0.108	0.742	0.029	0.045	0.075
2373	6	48	Saint_Paul_Field_2015	PI640286	6-row	TX01D283	DEVELOPED	United States	Texas	BREEDING	NA	NA	NA	NA	NA	NA	NA	Excluded from GWAS due to high amounts of missing SNP data or heterozygosity. NAM Parent.
2374	6	47	Saint_Paul_Field_2015	CIho15594	6-row	QB 139.8	DEVELOPED	Canada	Quebec	BREEDING	53.1305	-73.3634	0.026	0.011	0.003	0.788	0.171
2375	6	46	Saint_Paul_Field_2015	CIho14085	6-row	175	COLLECTED	Tunisia	L'Ariana	UNCERTAIN	36.8667	10.1833	0.994	0.001	0.001	0.002	0.001
2376	6	45	Saint_Paul_Field_2015	PI392504	6-row	Welgevallen 65-36-5	DEVELOPED	South Africa	Cape Province	BREEDING	-28.6737	21.5577	0.526	0.007	0.433	0.027	0.006
2377	6	44	Saint_Paul_Field_2015	PI331803	6-row	HOR 142	COLLECTED	India	NA	LANDRACE	22.844	74.986	0.004	0.074	0.009	0.909	0.005
2378	6	43	Saint_Paul_Field_2015	PI415348	6-row	IV/155	COLLECTED	Macedonia	NA	LANDRACE	41.609	21.334	0.354	0.003	0.029	0.609	0.005	NAM Parent
2379	6	42	Saint_Paul_Field_2015	PI84311	6-row	232	COLLECTED	Uzbekistan	Khorazm	LANDRACE	41.6	60.15	0.002	0.988	0.003	0.004	0.002
2380	6	41	Saint_Paul_Field_2015	PI608667	6-row	UC 937	DEVELOPED	United States	California	CULTIVAR	36.7783	-119.418	0.476	0.077	0.039	0.347	0.061
2381	6	40	Saint_Paul_Field_2015	PI402164	6-row	MCU 3686	COLLECTED	Colombia	Cundinamarca	UNCERTAIN	5.04392	-74.4405	0.079	0.01	0.007	0.9	0.004	NAM Parent
2382	6	39	Saint_Paul_Field_2015	CIho15593	6-row	QB 139.7	DEVELOPED	Canada	Quebec	BREEDING	53.1981	-73.2958	0.01	0.012	0.004	0.763	0.212
2383	6	38	Saint_Paul_Field_2015	PI174431	6-row	Escourgeon 1/2 Hatif des Tourettes	DEVELOPED	France	NA	CULTIVAR	46.076	2.454	0.702	0.002	0.008	0.286	0.002	NAM Parent
2384	6	37	Saint_Paul_Field_2015	PI181113	6-row	10893	COLLECTED	India	Gujarat	LANDRACE	23.9167	72.3833	0.179	0.617	0.008	0.045	0.151
2385	6	36	Saint_Paul_Field_2015	PI268250	6-row	26	COLLECTED	Iran	Ilam	LANDRACE	32.6833	47.2667	0.283	0.495	0.014	0.008	0.199
2386	6	35	Saint_Paul_Field_2015	PI247924	2-row	Rivale	DEVELOPED	France	Eure-et-Loir	CULTIVAR	48.519	1.27	0.078	0.002	0.658	0.261	0.002
2387	6	34	Saint_Paul_Field_2015	PI371111	2-row	1101BB	COLLECTED	Switzerland	Valais	LANDRACE	46.4359	7.185	0.01	0.008	0.581	0.391	0.01
2388	6	33	Saint_Paul_Field_2015	PI599627	2-row	Rubin	DEVELOPED	Czech Republic	NA	CULTIVAR	49.798	13.009	0.003	0.001	0.846	0.002	0.148
2389	6	32	Saint_Paul_Field_2015	PI548107	2-row	MFB 104	DEVELOPED	Hungary	Budapest	CULTIVAR	47.467	19.356	0.001	0.001	0.995	0.001	0.001
2390	6	31	Saint_Paul_Field_2015	PI365547	2-row	Gerkra	DEVELOPED	Netherlands	Groningen	CULTIVAR	53.312	6.221	0.001	0.001	0.994	0.002	0.001	NAM Parent
2391	6	30	Saint_Paul_Field_2015	PI643339	2-row	ND19922	DEVELOPED	United States	North Dakota	BREEDING	47.3437	-100.656	0.002	0.004	0.58	0.408	0.006
2392	6	29	Saint_Paul_Field_2015	PI337143	2-row	Magnif 128	DEVELOPED	Argentina	Buenos Aires	CULTIVAR	-34.685	-58.418	0.08	0.003	0.907	0.003	0.007
2393	6	28	Saint_Paul_Field_2015	PI392418	2-row	Welgevallen 62-13-173	DEVELOPED	South Africa	Cape Province	BREEDING	-31.762	20.029	0.235	0.002	0.759	0.002	0.002
2394	6	27	Saint_Paul_Field_2015	PI296457	2-row	H-2180	COLLECTED	Ethiopia	Tigre	LANDRACE	14.2	39.4167	0.002	0.001	0.002	0.002	0.994
2395	6	26	Saint_Paul_Field_2015	PI506299	2-row	NRPB 80-2000	DEVELOPED	United Kingdom	England	BREEDING	52.673	-0.9	0.13	0.003	0.861	0.002	0.003
2396	6	25	Saint_Paul_Field_2015	PI39368	2-row	Monte Cristo	COLLECTED	India	Bihar	LANDRACE	25.9833	85.6833	0.374	0.217	0.381	0.021	0.008	Planted with 2-row lines but looked 6-row in field. Categorized as 6-row in GrainGenes and GRIN, but categorized as 2-row in Muñoz-Amatriaín et al. 2014.
2397	6	24	Saint_Paul_Field_2015	PI294743	2-row	nudifurcatus	COLLECTED	Romania	Cluj	UNCERTAIN	46.7833	23.6167	0.01	0.465	0.286	0.019	0.22	NAM Parent
2398	6	23	Saint_Paul_Field_2015	PI414409	2-row	Minskij	DEVELOPED	Belarus	Minsk	CULTIVAR	53.9045	27.5615	0.001	0.001	0.995	0.002	0.001	NAM Parent
2399	6	22	Saint_Paul_Field_2015	PI573702	2-row	SN-2701	COLLECTED	Georgia	NA	LANDRACE	41.9472	44.7375	0.226	0.371	0.272	0.009	0.121
2400	6	21	Saint_Paul_Field_2015	PI294734	2-row	Brunneinudum	COLLECTED	Bulgaria	NA	UNCERTAIN	42.728	24.877	0.008	0.023	0.008	0.015	0.947
2401	6	20	Saint_Paul_Field_2015	PI342139	2-row	2407	COLLECTED	Turkey	Usak	LANDRACE	38.5	29.4167	0.262	0.01	0.251	0.255	0.222	NAM Parent
2402	6	19	Saint_Paul_Field_2015	CIho15313	6-row	Djebali	COLLECTED	Tunisia	Kebili	LANDRACE	33.4524	9.21619	0.934	0.01	0.006	0.02	0.03	Planted with 2-row lines but looked 6-row in field. Categorized as 6-row in GrainGenes and GRIN, but categorized as 2-row in Muñoz-Amatriaín et al. 2014.
2403	6	18	Saint_Paul_Field_2015	PI614939	2-row	Heris	DEVELOPED	Czech Republic	South Moravia	CULTIVAR	48.994	16.847	0.036	0.06	0.819	0.004	0.08	Secondary Check 1
2404	6	17	Saint_Paul_Field_2015	PI392481	2-row	Welgevallen 62-13-96	DEVELOPED	South Africa	Cape Province	BREEDING	-34.485	19.765	0.494	0.002	0.498	0.004	0.002
2405	6	16	Saint_Paul_Field_2015	PI337145	2-row	Magnif 132	DEVELOPED	Argentina	Buenos Aires	CULTIVAR	-35.318	-57.439	0.328	0.031	0.63	0.004	0.006
2406	6	15	Saint_Paul_Field_2015	PI183590	2-row	Angener Fruhe	COLLECTED	Austria	NA	CULTIVAR	47.2826	14.6737	0.049	0.003	0.608	0.336	0.003
2407	6	14	Saint_Paul_Field_2015	PI178636	2-row	9840	COLLECTED	Iraq	Baghdad	LANDRACE	33.3	44.6	0.241	0.322	0.173	0.036	0.228
2408	6	13	Saint_Paul_Field_2015	PI371105	2-row	1083A	COLLECTED	Switzerland	Valais	LANDRACE	46.3833	8.08333	0.005	0.026	0.572	0.386	0.01
2409	6	12	Saint_Paul_Field_2015	PI328855	2-row	Mansholts Tweerijige	DEVELOPED	Netherlands	Groningen	CULTIVAR	53.2194	6.5665	0.123	0.002	0.609	0.264	0.002
2410	6	11	Saint_Paul_Field_2015	PI342331	2-row	2608	COLLECTED	Turkey	Kutahya	LANDRACE	38.7519	29.2733	0.008	0.14	0.59	0.182	0.08	NAM Parent
2411	6	10	Saint_Paul_Field_2015	PI611511	2-row	Vestnik	DEVELOPED	Ukraine	Odesa	CULTIVAR	46.53	30.57	0.055	0.019	0.74	0.149	0.038
2412	6	9	Saint_Paul_Field_2015	PI573611	2-row	WIR 25662	COLLECTED	Cameroon	NA	UNCERTAIN	NA	NA	NA	NA	NA	NA	NA	Excluded from GWAS due to high amounts of missing SNP data or heterozygosity. NAM Parent.
2413	6	8	Saint_Paul_Field_2015	PI392458	2-row	Welgevallen 60-1-19	DEVELOPED	South Africa	Cape Province	BREEDING	-32.303	18.733	0.275	0.002	0.7	0.02	0.003
2414	6	7	Saint_Paul_Field_2015	PI370994	2-row	767A	COLLECTED	Switzerland	Valais	LANDRACE	46.4975	7.97639	0.006	0.008	0.626	0.351	0.009
2415	6	6	Saint_Paul_Field_2015	PI294739	2-row	Hindu Kusch	COLLECTED	Western Asia	NA	UNCERTAIN	NA	NA	0.048	0.754	0.02	0.088	0.09
2416	6	5	Saint_Paul_Field_2015	PI643288	2-row	ND15079	DEVELOPED	United States	North Dakota	BREEDING	47.4598	-100.559	0.031	0.009	0.523	0.378	0.059
2417	6	4	Saint_Paul_Field_2015	PI190203	2-row	Eglfinger Monachia	DEVELOPED	Germany	Bavaria	CULTIVAR	48.688	11.058	0.001	0.001	0.993	0.003	0.001	NAM Parent
2418	6	3	Saint_Paul_Field_2015	PI592276	2-row	Fusilier	DEVELOPED	United Kingdom	England	CULTIVAR	52.607	-1.539	0.234	0.002	0.689	0.073	0.002
2419	6	2	Saint_Paul_Field_2015	PI429311	2-row	NA	COLLECTED	Yemen	NA	LANDRACE	13.1798	43.9606	0.12	0.031	0.067	0.036	0.746
2420	6	1	Saint_Paul_Field_2015	PI643383	2-row	ND24564	DEVELOPED	United States	North Dakota	BREEDING	47.8312	-100.909	0.051	0.075	0.384	0.483	0.007
2421	7	1	Saint_Paul_Field_2015	PI392493	2-row	Welgevallen 62-2-14-1	DEVELOPED	South Africa	Cape Province	BREEDING	-32.488	20.688	0.517	0.002	0.473	0.006	0.002
2422	7	2	Saint_Paul_Field_2015	PI643242	2-row	ND7159	DEVELOPED	United States	North Dakota	BREEDING	47.3024	-101.365	0.002	0.003	0.625	0.357	0.013
2423	7	3	Saint_Paul_Field_2015	PI584962	2-row	Mi Mai 114	COLLECTED	China	Zhejiang	LANDRACE	28.6904	119.977	0.013	0.359	0.475	0.147	0.006	Secondary Check 2
2424	7	4	Saint_Paul_Field_2015	PI643292	2-row	ND15403	DEVELOPED	United States	North Dakota	BREEDING	47.4531	-100.63	0.002	0.003	0.508	0.486	0.002
2425	7	5	Saint_Paul_Field_2015	PI643267	2-row	ND12567	DEVELOPED	United States	North Dakota	BREEDING	47.7263	-100.907	0.027	0.023	0.522	0.425	0.003
2426	7	6	Saint_Paul_Field_2015	PI611527	2-row	Dneprovskii 435	DEVELOPED	Ukraine	Dnipropetrovsk	CULTIVAR	48.448	35.528	0.001	0.001	0.996	0.001	0.001
2427	7	7	Saint_Paul_Field_2015	PI135761	2-row	4753	COLLECTED	Afghanistan	Ghowr	LANDRACE	34.55	65.15	0.12	0.522	0.18	0.011	0.167
2428	7	8	Saint_Paul_Field_2015	PI611534	2-row	Zhodinskii 5	DEVELOPED	Belarus	NA	CULTIVAR	52.684	28.501	0.097	0.07	0.779	0.042	0.011
2429	7	9	Saint_Paul_Field_2015	PI371217	2-row	1340C	COLLECTED	Switzerland	Valais	LANDRACE	46.1667	7.8	0.02	0.017	0.644	0.314	0.006
2430	7	10	Saint_Paul_Field_2015	PI428413	2-row	Sandra	DEVELOPED	France	Yvelines	CULTIVAR	48.86	1.717	0.395	0.002	0.396	0.203	0.004
2431	7	11	Saint_Paul_Field_2015	PI573675	2-row	SN-1056	COLLECTED	Georgia	NA	LANDRACE	43.4656	42.4347	0.11	0.461	0.235	0.077	0.118
2432	7	12	Saint_Paul_Field_2015	PI548760	2-row	HOR 4469	COLLECTED	Syria	Dar 'a	UNCERTAIN	32.6167	36.1	0.545	0.145	0.058	0.031	0.222
2433	7	13	Saint_Paul_Field_2015	PI422230	2-row	NA	COLLECTED	Yemen	NA	LANDRACE	NA	NA	NA	NA	NA	NA	NA	Excluded from all analyses. In 2015, one plant was 2-row but the rest were 6-row. Categorized as 2-row in all databases.
2434	7	14	Saint_Paul_Field_2015	CIho13653	2-row	Kolchikum 10/30	COLLECTED	Soviet Union	Former	CULTIVAR	61.53	105.32	0.157	0.408	0.358	0.015	0.062
2435	7	15	Saint_Paul_Field_2015	PI392469	2-row	Welgevallen 65-5-4	DEVELOPED	South Africa	Cape Province	BREEDING	-34.213	21.106	0.518	0.044	0.432	0.004	0.002
2436	7	16	Saint_Paul_Field_2015	PI392448	2-row	Welgevallen 65-41-7	DEVELOPED	South Africa	Cape Province	BREEDING	-31.968	20.798	0.25	0.053	0.687	0.005	0.004
2437	7	17	Saint_Paul_Field_2015	PI643336	2-row	ND19855	DEVELOPED	United States	North Dakota	BREEDING	47.7109	-101.408	0.003	0.003	0.529	0.462	0.002
2438	7	18	Saint_Paul_Field_2015	PI371102	2-row	1069B	COLLECTED	Switzerland	Valais	LANDRACE	46.717	7.86668	0.064	0.169	0.368	0.395	0.004
2439	7	19	Saint_Paul_Field_2015	PI506293	2-row	Teo	DEVELOPED	United Kingdom	England	CULTIVAR	52.312	-2.858	0.073	0.002	0.921	0.003	0.002
2440	7	20	Saint_Paul_Field_2015	PI420923	2-row	36	COLLECTED	Jordan	NA	LANDRACE	30.65	35.6333	0.406	0.263	0.078	0.052	0.201
2441	7	21	Saint_Paul_Field_2015	PI467729	2-row	Moyjar	DEVELOPED	Norway	NA	CULTIVAR	60.472	8.46894	0.002	0.001	0.991	0.003	0.003	NAM Parent
2442	7	22	Saint_Paul_Field_2015	PI370983	2-row	729C	COLLECTED	Switzerland	Valais	LANDRACE	46.45	8.23333	0.007	0.003	0.551	0.433	0.006
2443	7	23	Saint_Paul_Field_2015	PI414084	2-row	Criolla Negra	COLLECTED	Bolivia	NA	UNCERTAIN	-17.899	-63.896	0.001	0.002	0.001	0.001	0.994
2444	7	24	Saint_Paul_Field_2015	CIho13353	2-row	CI 13353	COLLECTED	Ethiopia	Gonder	LANDRACE	12.3188	37.38	0.006	0.069	0.722	0.06	0.142
2445	7	25	Saint_Paul_Field_2015	PI592271	2-row	Coronet	DEVELOPED	United Kingdom	England	CULTIVAR	52.6976	-1.95669	0.005	0.002	0.933	0.002	0.057
2446	7	26	Saint_Paul_Field_2015	CIho16612	2-row	Isogenic: Normal Height Dekap	DEVELOPED	United States	Montana	GENETIC	46.88	110.35	0.091	0.143	0.686	0.019	0.06	NAM Parent
2447	7	27	Saint_Paul_Field_2015	PI268241	2-row	No. 61	COLLECTED	Iran	Fars	LANDRACE	29.6167	52.2333	0.309	0.324	0.202	0.008	0.157
2448	7	28	Saint_Paul_Field_2015	PI605472	2-row	Garnet	DEVELOPED	United States	Idaho	CULTIVAR	44.253	-114.315	0.005	0.002	0.955	0.035	0.003
2449	7	29	Saint_Paul_Field_2015	CIho2224	2-row	CI 2224	DEVELOPED	United States	Minnesota	BREEDING	45.34	-93.31	0.005	0.161	0.004	0.293	0.537
2450	7	30	Saint_Paul_Field_2015	PI296188	2-row	Narodnyj 9	DEVELOPED	Russian Federation	Krasnodar	CULTIVAR	45.0393	38.9872	0.129	0.266	0.255	0.247	0.103
2451	7	31	Saint_Paul_Field_2015	PI643322	2-row	ND18380-1	DEVELOPED	United States	North Dakota	BREEDING	47.5208	-100.576	0.005	0.033	0.447	0.504	0.011
2452	7	32	Saint_Paul_Field_2015	PI283389	2-row	C.P.I. 13551	COLLECTED	Norway	NA	UNCERTAIN	60.914	10.216	0.002	0.012	0.938	0.046	0.002
2453	7	33	Saint_Paul_Field_2015	PI498435	6-row	Makomako	DEVELOPED	New Zealand	NA	CULTIVAR	-44.079	169.222	0.054	0.003	0.839	0.099	0.006	Excluded from all analyses. Planted with 2-row lines but looked 6-row in field. Categorized as 2-row in all databases.
2454	7	34	Saint_Paul_Field_2015	PI498439	2-row	Rupe	DEVELOPED	New Zealand	NA	CULTIVAR	-45.851	168.915	0.251	0.001	0.737	0.009	0.002
2455	7	35	Saint_Paul_Field_2015	PI592261	2-row	Elliot	DEVELOPED	United Kingdom	Scotland	CULTIVAR	56.94	-4.63	0.004	0.002	0.922	0.004	0.069
2456	7	36	Saint_Paul_Field_2015	PI531889	6-row	1055	COLLECTED	Egypt	NA	UNCERTAIN	27.0259	31.1762	0.497	0.261	0.012	0.004	0.226
2457	7	37	Saint_Paul_Field_2015	CIho14807	6-row	Freak	DEVELOPED	United States	Idaho	GENETIC	NA	NA	NA	NA	NA	NA	NA	Excluded from all analyses. Intermediate? One plant 6-row but the rest were 2-row/intermediate. Categorized as 2-row in GrainGenes and as 6-row in GRIN and Muñoz-Amatriaín et al. 2014.
2458	7	38	Saint_Paul_Field_2015	PI73700	6-row	9123	COLLECTED	China	Manchuria	LANDRACE	44.6679	124.681	0.002	0.117	0.002	0.878	0.001
2459	7	39	Saint_Paul_Field_2015	CIho7153	6-row	36Ab2568	DEVELOPED	United States	Idaho	BREEDING	44.5327	-115.093	0.43	0.022	0.409	0.134	0.004	Secondary Check 1
2460	7	40	Saint_Paul_Field_2015	CIho15600	6-row	QB 139.17	DEVELOPED	Canada	Quebec	BREEDING	53.0288	-73.4651	0.007	0.004	0.002	0.872	0.115	NAM Parent
2461	7	41	Saint_Paul_Field_2015	PI327868	6-row	HOR 4170	COLLECTED	Turkmenistan	Ahal	LANDRACE	37.4833	58.4	0.245	0.007	0.22	0.446	0.082
2462	7	42	Saint_Paul_Field_2015	PI410464	6-row	N31B	COLLECTED	Pakistan	Azad Kashmir	LANDRACE	36.4333	73.3833	0.009	0.308	0.6	0.072	0.01
2463	7	43	Saint_Paul_Field_2015	PI640214	6-row	TX01D209	DEVELOPED	United States	Texas	BREEDING	30.2522	-98.2158	0.096	0.207	0.004	0.691	0.002
2464	7	44	Saint_Paul_Field_2015	CIho14344	6-row	CI 14344	COLLECTED	Azerbaijan	NA	LANDRACE	40.14	47.58	0.215	0.324	0.245	0.153	0.063
2465	7	45	Saint_Paul_Field_2015	PI178285	6-row	Siha	COLLECTED	Turkey	Adana	LANDRACE	36.8167	35.75	0.931	0.011	0.003	0.043	0.012
2466	7	46	Saint_Paul_Field_2015	PI640222	6-row	TX01D217	DEVELOPED	United States	Texas	BREEDING	32.3436	-97.7434	0.33	0.037	0.004	0.623	0.006
2467	7	47	Saint_Paul_Field_2015	PI173518	6-row	6699	COLLECTED	Turkey	Samsun	LANDRACE	41.6167	35.6167	0.414	0.005	0.024	0.553	0.004	NAM Parent
2468	7	48	Saint_Paul_Field_2015	PI277393	6-row	S-18	COLLECTED	Ethiopia	Shewa	LANDRACE	9.06667	38.5	0.001	0.001	0.001	0.001	0.997
2469	7	49	Saint_Paul_Field_2015	PI401939	6-row	MCU 3461	COLLECTED	Colombia	Cundinamarca	UNCERTAIN	4.59421	-74.2214	0.335	0.002	0.006	0.46	0.197
2470	7	50	Saint_Paul_Field_2015	PI186125	6-row	Chae-Rae-Baec	COLLECTED	Korea, South	NA	LANDRACE	35.9	127.8	0.004	0.511	0.002	0.481	0.002
2471	7	51	Saint_Paul_Field_2015	PI264912	6-row	663	COLLECTED	Greece	Macedonia	LANDRACE	40.2667	23.4333	0.735	0.009	0.005	0.248	0.002
2472	7	52	Saint_Paul_Field_2015	PI415014	6-row	Puebla	DEVELOPED	Mexico	Federal District	CULTIVAR	19.6404	-99.0892	0.487	0.002	0.078	0.381	0.052
2473	7	53	Saint_Paul_Field_2015	CIho15291	6-row	Djebali	COLLECTED	Tunisia	Bizerte	LANDRACE	36.5919	10.4054	0.991	0.004	0.001	0.002	0.002
2474	7	54	Saint_Paul_Field_2015	PI584867	6-row	Escourgeon de Vendee	DEVELOPED	France	NA	CULTIVAR	47.876	1.092	0.432	0.002	0.164	0.4	0.002
2475	7	55	Saint_Paul_Field_2015	PI564500	6-row	Valluno	DEVELOPED	Bolivia	NA	CULTIVAR	-15.71	-64.77	0.001	0.001	0.001	0.001	0.996
2476	7	56	Saint_Paul_Field_2015	PI629116	6-row	Reliance	DEVELOPED	United States	Montana	CULTIVAR	47.1951	-110.329	0.227	0.183	0.137	0.344	0.109
2477	7	57	Saint_Paul_Field_2015	CIho14055	6-row	38	COLLECTED	Algeria	NA	LANDRACE	33.0167	6.01667	0.684	0.032	0.021	0.241	0.022
2478	7	58	Saint_Paul_Field_2015	PI370970	6-row	696C	COLLECTED	Switzerland	Valais	LANDRACE	46.4167	8.16667	0.058	0.342	0.023	0.567	0.009
2479	7	59	Saint_Paul_Field_2015	PI223446	6-row	Jow	COLLECTED	Afghanistan	Badakhshan	LANDRACE	37.1175	70.5797	0.002	0.993	0.002	0.002	0.002
2480	7	60	Saint_Paul_Field_2015	PI640340	6-row	TX01D337	DEVELOPED	United States	Texas	BREEDING	31.9051	-99.7834	0.052	0.239	0.111	0.586	0.012
2481	7	61	Saint_Paul_Field_2015	PI467352	6-row	Bjorneby	DEVELOPED	Norway	NA	CULTIVAR	60.472	8.4689	0.002	0.001	0.004	0.992	0.001
2482	7	62	Saint_Paul_Field_2015	PI356719	6-row	MOR 12/6	COLLECTED	Morocco	NA	LANDRACE	32.405	-5.735	0.986	0.003	0.003	0.006	0.002	NAM Parent
2483	7	63	Saint_Paul_Field_2015	PI270641	6-row	43	COLLECTED	Peru	Puno	LANDRACE	-15.7281	-69.5863	0.798	0.002	0.002	0.002	0.197
2484	7	64	Saint_Paul_Field_2015	CIho6549	6-row	CI 6549	DEVELOPED	Sweden	Malmohus	BREEDING	56.0403	13.6458	0.002	0.002	0.155	0.839	0.002
2485	7	65	Saint_Paul_Field_2015	CIho7153	6-row	36Ab2568	DEVELOPED	United States	Idaho	BREEDING	44.5327	-115.093	0.43	0.022	0.409	0.134	0.004
2486	7	66	Saint_Paul_Field_2015	PI402364	6-row	MCU 3886	COLLECTED	Colombia	Cundinamarca	UNCERTAIN	4.63303	-73.9551	0.509	0.004	0.008	0.361	0.117
2487	7	67	Saint_Paul_Field_2015	PI371156	6-row	1265G	COLLECTED	Switzerland	Valais	LANDRACE	46.4004	7.74518	0.014	0.003	0.346	0.633	0.004
2488	7	68	Saint_Paul_Field_2015	CIho2205	6-row	Sangatsuko	COLLECTED	Japan	NA	UNCERTAIN	36.19	138.23	0.001	0.996	0.001	0.001	0.001	NAM Parent
2489	7	69	Saint_Paul_Field_2015	PI584886	6-row	Motan	DEVELOPED	France	Herault	CULTIVAR	43.5912	3.25836	0.53	0.008	0.269	0.189	0.005
2490	7	70	Saint_Paul_Field_2015	PI328485	6-row	HOR 1130	COLLECTED	Greece	Crete	LANDRACE	35.0167	26.1	0.983	0.003	0.003	0.003	0.009	NAM Parent
2491	8	70	Saint_Paul_Field_2015	PI640220	6-row	TX01D215	DEVELOPED	United States	Texas	BREEDING	30.4934	-97.9746	0.232	0.016	0.003	0.721	0.028	NAM Parent
2492	8	69	Saint_Paul_Field_2015	PI84313	6-row	261	COLLECTED	Uzbekistan	Karakalpakstan	LANDRACE	43.1667	59.6667	0.003	0.986	0.004	0.005	0.002
2493	8	68	Saint_Paul_Field_2015	Rasmussen	6-row	Rasmussen	DEVELOPED	United States	South Dakota	CULTIVAR	NA	NA	NA	NA	NA	NA	NA	Primary Check
2494	8	67	Saint_Paul_Field_2015	PI296460	6-row	H-2227	COLLECTED	Eritrea	Senhit	LANDRACE	15.7778	38.4581	0.008	0.005	0.004	0.005	0.978	NAM Parent
2495	8	66	Saint_Paul_Field_2015	PI95229	6-row	511	COLLECTED	Unknown	NA	LANDRACE	NA	NA	0.001	0.001	0.001	0.001	0.997
2496	8	65	Saint_Paul_Field_2015	PI447191	6-row	NA	COLLECTED	Spain	NA	UNCERTAIN	38.737	-5.285	0.97	0.005	0.01	0.011	0.003
2497	8	64	Saint_Paul_Field_2015	PI55526	6-row	Commune A	COLLECTED	Tunisia	NA	LANDRACE	32.589	9.395	0.465	0.003	0.099	0.429	0.004
2498	8	63	Saint_Paul_Field_2015	Rasmussen	6-row	Rasmussen	DEVELOPED	United States	South Dakota	CULTIVAR	NA	NA	NA	NA	NA	NA	NA	Primary Check
2499	8	62	Saint_Paul_Field_2015	CIho4144	6-row	Kaljou	COLLECTED	Afghanistan	Parwan	LANDRACE	34.9333	68.4833	0.003	0.973	0.005	0.003	0.015
2500	8	61	Saint_Paul_Field_2015	PI129499	6-row	Sobieszynski	DEVELOPED	Poland	NA	CULTIVAR	52.521	18.734	0.001	0.001	0.002	0.994	0.001
2501	8	60	Saint_Paul_Field_2015	PI94919	6-row	523	COLLECTED	Ukraine	Kharkiv	LANDRACE	50.0559	36.6058	0.11	0.047	0.205	0.628	0.01
2502	8	59	Saint_Paul_Field_2015	CIho14216	6-row	4041	COLLECTED	Mongolia	NA	LANDRACE	47.3005	104.285	0.002	0.989	0.003	0.003	0.003	NAM Parent
2503	8	58	Saint_Paul_Field_2015	Rasmussen	6-row	Rasmussen	DEVELOPED	United States	South Dakota	CULTIVAR	NA	NA	NA	NA	NA	NA	NA	Primary Check
2504	8	57	Saint_Paul_Field_2015	PI343713	6-row	1	COLLECTED	Saudi Arabia	NA	UNCERTAIN	24.4849	47.1562	0.263	0.36	0.023	0.004	0.351
2505	8	56	Saint_Paul_Field_2015	CIho2339	6-row	B-71	COLLECTED	Iraq	NA	LANDRACE	NA	NA	NA	NA	NA	NA	NA	Excluded from GWAS due to high amounts of missing SNP data or heterozygosity.
2506	8	55	Saint_Paul_Field_2015	PI564501	6-row	K'ochala	DEVELOPED	Bolivia	NA	CULTIVAR	-18.69	-66.44	0.001	0.001	0.001	0.001	0.996
2507	8	54	Saint_Paul_Field_2015	PI378224	6-row	15/72	COLLECTED	Serbia	NA	LANDRACE	43.9708	19.5675	0.173	0.005	0.004	0.815	0.003
2508	8	53	Saint_Paul_Field_2015	Rasmussen	6-row	Rasmussen	DEVELOPED	United States	South Dakota	CULTIVAR	NA	NA	NA	NA	NA	NA	NA	Primary Check
2509	8	52	Saint_Paul_Field_2015	CIho14054	6-row	38	COLLECTED	Algeria	NA	LANDRACE	NA	NA	NA	NA	NA	NA	NA	Excluded from GWAS due to high amounts of missing SNP data or heterozygosity.
2510	8	51	Saint_Paul_Field_2015	PI434760	6-row	QB 704.3	DEVELOPED	Canada	Quebec	BREEDING	52.9434	-73.5505	0.001	0.001	0.002	0.995	0.001
2511	8	50	Saint_Paul_Field_2015	PI329122	6-row	Szekacs 31	DEVELOPED	Hungary	NA	CULTIVAR	46.816	18.41	0.17	0.002	0.002	0.824	0.001
2512	8	49	Saint_Paul_Field_2015	PI640250	6-row	TX01D247	DEVELOPED	United States	Texas	BREEDING	30.1927	-98.2753	0.037	0.005	0.072	0.878	0.009
2513	8	48	Saint_Paul_Field_2015	Rasmussen	6-row	Rasmussen	DEVELOPED	United States	South Dakota	CULTIVAR	NA	NA	NA	NA	NA	NA	NA	Primary Check
2514	8	47	Saint_Paul_Field_2015	PI467735	6-row	Zoapila	DEVELOPED	Mexico	NA	CULTIVAR	23.157	-102.703	0.187	0.015	0.012	0.783	0.003
2515	8	46	Saint_Paul_Field_2015	PI76286	6-row	B-97	COLLECTED	Iraq	Baghdad	LANDRACE	33.3621	44.9024	0.228	0.569	0.008	0.011	0.184
2516	8	45	Saint_Paul_Field_2015	PI328417	6-row	HOR 703	COLLECTED	Greece	Central Greece	LANDRACE	37.9333	23.5333	0.906	0.037	0.034	0.015	0.008
2517	8	44	Saint_Paul_Field_2015	CIho7265	6-row	Comtesse	DEVELOPED	France	Yvelines	CULTIVAR	48.867	1.758	0.001	0.001	0.002	0.994	0.001
2518	8	43	Saint_Paul_Field_2015	Rasmussen	6-row	Rasmussen	DEVELOPED	United States	South Dakota	CULTIVAR	NA	NA	NA	NA	NA	NA	NA	Primary Check
2519	8	42	Saint_Paul_Field_2015	PI371817	6-row	Ablyn	DEVELOPED	Australia	New South Wales	CULTIVAR	-31.04	148.97	0.796	0.059	0.137	0.004	0.004	NAM Parent
2520	8	41	Saint_Paul_Field_2015	PI329000	6-row	S 3192	COLLECTED	Ethiopia	NA	LANDRACE	5.02	38.702	0.001	0.001	0.001	0.005	0.991	NAM Parent
2521	8	40	Saint_Paul_Field_2015	PI223879	6-row	Jow	COLLECTED	Afghanistan	Baghlan	LANDRACE	NA	NA	NA	NA	NA	NA	NA	Excluded from GWAS due to high amounts of missing SNP data or heterozygosity.
2522	8	39	Saint_Paul_Field_2015	PI270692	6-row	94	COLLECTED	Peru	Puno	LANDRACE	-16.1353	-69.794	0.995	0.001	0.001	0.001	0.001	NAM Parent
2523	8	38	Saint_Paul_Field_2015	Rasmussen	6-row	Rasmussen	DEVELOPED	United States	South Dakota	CULTIVAR	NA	NA	NA	NA	NA	NA	NA	Primary Check
2524	8	37	Saint_Paul_Field_2015	PI640034	6-row	TX02D222	DEVELOPED	United States	Texas	BREEDING	32.4916	-97.5954	0.033	0.114	0.105	0.719	0.029
2525	8	36	Saint_Paul_Field_2015	PI467758	6-row	Mashu Mugi	DEVELOPED	Japan	Hokkaido	CULTIVAR	43.2203	142.863	0.008	0.006	0.038	0.942	0.006	NAM Parent
2526	8	35	Saint_Paul_Field_2015	PI371327	2-row	1964C	COLLECTED	Switzerland	Graubunden	LANDRACE	46.6667	9.23333	0.002	0.006	0.451	0.538	0.003
2527	8	34	Saint_Paul_Field_2015	CIho11794	2-row	L93	COLLECTED	Netherlands	NA	UNCERTAIN	51.813	5.64	0.028	0.023	0.005	0.006	0.938
2528	8	33	Saint_Paul_Field_2015	Conlon	2-row	Conlon	DEVELOPED	United States	South Dakota	CULTIVAR	NA	NA	NA	NA	NA	NA	NA	Primary Check
2529	8	32	Saint_Paul_Field_2015	PI285084	2-row	Astrid	DEVELOPED	France	Nord	CULTIVAR	50.156	2.629	0.01	0.002	0.938	0.049	0.001
2530	8	31	Saint_Paul_Field_2015	PI342329	2-row	2606	COLLECTED	Turkey	Kutahya	LANDRACE	39.6325	29.9064	0.122	0.151	0.525	0.054	0.148
2531	8	30	Saint_Paul_Field_2015	PI436150	2-row	250	COLLECTED	Chile	La Araucania	LANDRACE	-38.6	-72.85	0.001	0.001	0.996	0.001	0.001
2532	8	29	Saint_Paul_Field_2015	PI467850	2-row	Antarctica 06	DEVELOPED	Brazil	NA	CULTIVAR	-13.196	-45.053	0.009	0.007	0.785	0.184	0.015
2533	8	28	Saint_Paul_Field_2015	Conlon	2-row	Conlon	DEVELOPED	United States	South Dakota	CULTIVAR	NA	NA	NA	NA	NA	NA	NA	Primary Check
2534	8	27	Saint_Paul_Field_2015	CIho9562	2-row	Domen	DEVELOPED	Norway	Hedmark	CULTIVAR	60.5	11.891	0.002	0.002	0.75	0.242	0.004
2535	8	26	Saint_Paul_Field_2015	PI357314	2-row	Riso 6018	DEVELOPED	Denmark	Roskilde	BREEDING	55.667	12.131	0.002	0.001	0.993	0.002	0.002	NAM Parent
2536	8	25	Saint_Paul_Field_2015	PI386524	2-row	IAR/B/431	COLLECTED	Ethiopia	Sidamo	LANDRACE	6.48333	38.5167	0.001	0.001	0.001	0.001	0.997
2537	8	24	Saint_Paul_Field_2015	PI386462	2-row	IAR/B/434	COLLECTED	Ethiopia	Tigre	LANDRACE	14.1667	38.9	0.002	0.002	0.001	0.002	0.993
2538	8	23	Saint_Paul_Field_2015	Conlon	2-row	Conlon	DEVELOPED	United States	South Dakota	CULTIVAR	NA	NA	NA	NA	NA	NA	NA	Primary Check
2539	8	22	Saint_Paul_Field_2015	PI467364	2-row	Refsum	DEVELOPED	Norway	NA	CULTIVAR	61.605	10.985	0.059	0.003	0.544	0.386	0.008
2540	8	21	Saint_Paul_Field_2015	CIho6880	2-row	Fan Shaped	DEVELOPED	United States	Idaho	GENETIC	43.7376	-114.63	0.09	0.021	0.005	0.007	0.877
2541	8	20	Saint_Paul_Field_2015	PI643376	2-row	ND24379	DEVELOPED	United States	North Dakota	BREEDING	47.5217	-100.993	0.004	0.004	0.456	0.446	0.091
2542	8	19	Saint_Paul_Field_2015	PI599656	2-row	NSGC 6416	COLLECTED	China	Xinjiang	UNCERTAIN	46.5667	83.6	0.006	0.013	0.972	0.004	0.006
2543	8	18	Saint_Paul_Field_2015	Conlon	2-row	Conlon	DEVELOPED	United States	South Dakota	CULTIVAR	NA	NA	NA	NA	NA	NA	NA	Primary Check
2544	8	17	Saint_Paul_Field_2015	PI350725	2-row	69Z108.189	COLLECTED	Austria	Tirol	LANDRACE	47.05	10.6167	0.007	0.01	0.566	0.411	0.006
2545	8	16	Saint_Paul_Field_2015	PI264890	2-row	24	COLLECTED	Italy	Sicily	LANDRACE	37.6333	14.7667	0.751	0.022	0.215	0.003	0.009
2546	8	15	Saint_Paul_Field_2015	PI436153	2-row	338	COLLECTED	Chile	Los Lagos	LANDRACE	-40.8	-73.1833	0.002	0.002	0.992	0.002	0.002
2547	8	14	Saint_Paul_Field_2015	PI592172	2-row	Donan	DEVELOPED	United Kingdom	Scotland	CULTIVAR	57.405	-3.762	0.002	0.001	0.973	0.002	0.023
2548	8	13	Saint_Paul_Field_2015	Conlon	2-row	Conlon	DEVELOPED	United States	South Dakota	CULTIVAR	NA	NA	NA	NA	NA	NA	NA	Primary Check
2549	8	12	Saint_Paul_Field_2015	PI643257	2-row	ND10270	DEVELOPED	United States	North Dakota	BREEDING	47.5057	-100.736	0.003	0.004	0.604	0.384	0.004
2550	8	11	Saint_Paul_Field_2015	PI573610	2-row	WIR 4697	COLLECTED	Armenia	NA	LANDRACE	40.0691	45.0382	0.13	0.306	0.343	0.136	0.085
2551	8	10	Saint_Paul_Field_2015	PI227449	6-row	Jo	COLLECTED	Iran	Fars	LANDRACE	29.2177	53.456	0.189	0.254	0.204	0.335	0.018	NAM Parent. Categorized as both 2-row and 6-row in GRIN. Picture in GRIN looks 2-row, but it looks 6-row in my field. Categorized as 2-row in Muñoz-Amatriaín et al. 2014. Spike row-type not characterized in GrainGenes.
2552	8	9	Saint_Paul_Field_2015	PI290193	2-row	Feiner Original	COLLECTED	Hungary	Pest	CULTIVAR	47.2604	19.6025	0.003	0.001	0.894	0.098	0.003	NAM Parent
2553	8	8	Saint_Paul_Field_2015	Conlon	2-row	Conlon	DEVELOPED	United States	South Dakota	CULTIVAR	NA	NA	NA	NA	NA	NA	NA	Primary Check
2554	8	7	Saint_Paul_Field_2015	PI392512	2-row	Welgevallen 60-3-88A	DEVELOPED	South Africa	Cape Province	BREEDING	-28.9097	21.9327	0.463	0.003	0.518	0.012	0.004
2555	8	6	Saint_Paul_Field_2015	PI643232	2-row	ND5021-3	DEVELOPED	United States	North Dakota	BREEDING	47.2837	-101.281	0.023	0.005	0.659	0.31	0.004
2556	8	5	Saint_Paul_Field_2015	PI643283	2-row	ND14701	DEVELOPED	United States	North Dakota	BREEDING	47.522	-100.575	0.004	0.002	0.539	0.414	0.041	NAM Parent
2557	8	4	Saint_Paul_Field_2015	PI57015	2-row	FLE No. B68	COLLECTED	Iraq	NA	LANDRACE	33.23	43.69	0.253	0.302	0.226	0.022	0.198	NAM Parent
2558	8	3	Saint_Paul_Field_2015	Conlon	2-row	Conlon	DEVELOPED	United States	South Dakota	CULTIVAR	NA	NA	NA	NA	NA	NA	NA	Primary Check
2559	8	2	Saint_Paul_Field_2015	PI371390	2-row	2004B	COLLECTED	Switzerland	Graubunden	LANDRACE	46.8	10.2333	0.006	0.01	0.468	0.508	0.009	NAM Parent
2560	8	1	Saint_Paul_Field_2015	PI296996	2-row	B.273-0-15-001	DEVELOPED	Argentina	Buenos Aires	BREEDING	34.6037	58.3816	0.093	0.678	0.217	0.006	0.006
2561	9	1	Saint_Paul_Field_2015	PI614939	2-row	Heris	DEVELOPED	Czech Republic	South Moravia	CULTIVAR	48.994	16.847	0.036	0.06	0.819	0.004	0.08	Secondary Check 1
2562	9	2	Saint_Paul_Field_2015	PI183598	2-row	Otterbacher	DEVELOPED	Austria	NA	CULTIVAR	48.051	14.904	0.002	0.01	0.922	0.063	0.002
2563	9	3	Saint_Paul_Field_2015	PI410865	2-row	Varunda	DEVELOPED	Netherlands	Gelderland	CULTIVAR	51.897	5.935	0.052	0.592	0.343	0.009	0.004
2564	9	4	Saint_Paul_Field_2015	PI283401	2-row	Hatvani 1108	DEVELOPED	Hungary	Heves	CULTIVAR	47.7936	20.2215	0.004	0.002	0.986	0.007	0.002	NAM Parent
2565	9	5	Saint_Paul_Field_2015	PI361671	2-row	Long Glumes	COLLECTED	Denmark	NA	UNCERTAIN	55.8778	9.73126	0.116	0.218	0.54	0.016	0.11
2566	9	6	Saint_Paul_Field_2015	PI371323	2-row	1958C	COLLECTED	Switzerland	Graubunden	LANDRACE	46.6833	8.86667	0.003	0.004	0.512	0.476	0.006
2567	9	7	Saint_Paul_Field_2015	PI467844	2-row	FM 404	DEVELOPED	Brazil	Rio Grande do Sul	CULTIVAR	-30.499	-53.187	0.022	0.014	0.515	0.447	0.002
2568	9	8	Saint_Paul_Field_2015	PI195318	2-row	2725	COLLECTED	Guatemala	Totonicapan	LANDRACE	14.9167	-91.3667	0.499	0.433	0.01	0.011	0.048
2569	9	9	Saint_Paul_Field_2015	PI327969	2-row	Vankkuri	DEVELOPED	Finland	NA	CULTIVAR	61.9819	25.3969	0.001	0.001	0.994	0.002	0.002	NAM Parent
2570	9	10	Saint_Paul_Field_2015	PI506295	2-row	NRPB 80-881	DEVELOPED	United Kingdom	England	BREEDING	52.58	-3.47	0.04	0.014	0.917	0.014	0.016	NAM Parent
2571	9	11	Saint_Paul_Field_2015	PI399492	2-row	Drossel	DEVELOPED	Germany	Mecklenburg-W.P.	CULTIVAR	53.574	11.899	0.002	0.003	0.397	0.597	0.002
2572	9	12	Saint_Paul_Field_2015	PI392501	2-row	Welgevallen 65-31-36	DEVELOPED	South Africa	Cape Province	BREEDING	-28.6113	21.9403	0.42	0.003	0.565	0.01	0.002
2573	9	13	Saint_Paul_Field_2015	PI611480	2-row	NA	COLLECTED	North Korea	NA	UNCERTAIN	38.729	125.998	0.003	0.002	0.826	0.166	0.003
2574	9	14	Saint_Paul_Field_2015	CIho16658	2-row	Isogenic: 2-Row Large Lateral Late	DEVELOPED	United States	Montana	GENETIC	46.6904	-110.689	0.457	0.007	0.407	0.118	0.011
2575	9	15	Saint_Paul_Field_2015	PI371056	2-row	880B	COLLECTED	Switzerland	Valais	LANDRACE	46.2513	7.31172	0.01	0.057	0.642	0.248	0.043	NAM Parent
2576	9	16	Saint_Paul_Field_2015	PI584973	2-row	Ta Cheng Er Leng	COLLECTED	China	Xinjiang	LANDRACE	42.4909	86.2732	0.05	0.005	0.449	0.493	0.003
2577	9	17	Saint_Paul_Field_2015	PI573617	2-row	Abava	DEVELOPED	Latvia	NA	CULTIVAR	57.022	24.835	0.002	0.002	0.81	0.183	0.003
2578	9	18	Saint_Paul_Field_2015	PI286388	2-row	CIho 12089	COLLECTED	Eritrea	Asmara	LANDRACE	14.8491	38.5891	0.001	0.001	0.001	0.001	0.996	NAM Parent
2579	9	19	Saint_Paul_Field_2015	PI574343	2-row	15050	COLLECTED	Saudi Arabia	NA	UNCERTAIN	22.59	46.93	0.319	0.101	0.094	0.007	0.48
2580	9	20	Saint_Paul_Field_2015	PI467786	2-row	Aramir	DEVELOPED	Netherlands	South Holland	CULTIVAR	52.112	4.409	0.003	0.002	0.972	0.012	0.011
2581	9	21	Saint_Paul_Field_2015	PI290165	2-row	MFB 101	DEVELOPED	Hungary	Budapest	CULTIVAR	47.4979	19.0402	0.003	0.002	0.986	0.006	0.002	NAM Parent. Replaced line that did not flower in 2014.
2582	9	22	Saint_Paul_Field_2015	PI599649	2-row	Amulet	DEVELOPED	Czech Republic	Central Bohemia	CULTIVAR	49.611	14.112	0.002	0.073	0.838	0.003	0.083	NAM Parent
2583	9	23	Saint_Paul_Field_2015	PI436154	2-row	345	COLLECTED	Chile	Los Lagos	LANDRACE	-40.8833	-73.15	0.014	0.01	0.575	0.398	0.003	NAM Parent
2584	9	24	Saint_Paul_Field_2015	PI574302	2-row	PRC-91-SB-7	DEVELOPED	China	Jiangsu	BREEDING	32.514	118.902	0.039	0.026	0.707	0.227	0.002
2585	9	25	Saint_Paul_Field_2015	PI392407	2-row	Welgevallen 60-12-49	DEVELOPED	South Africa	Cape Province	BREEDING	-32.71	22.116	0.28	0.002	0.705	0.006	0.008	NAM Parent
2586	9	26	Saint_Paul_Field_2015	PI186424	2-row	Deficiens d'Abyssinia	COLLECTED	Ethiopia	NA	LANDRACE	9.445	40.7897	0.004	0.007	0.004	0.005	0.979
2587	9	27	Saint_Paul_Field_2015	PI382506	2-row	GAW 71-16	COLLECTED	Ethiopia	Tigre	LANDRACE	14.4073	38.9534	0.001	0.001	0.001	0.001	0.996
2588	9	28	Saint_Paul_Field_2015	PI328835	2-row	Hatvani 308	DEVELOPED	Hungary	Heves	CULTIVAR	47.225	19.6843	0.002	0.001	0.992	0.003	0.002	NAM Parent
2589	9	29	Saint_Paul_Field_2015	PI599621	2-row	Atlas	DEVELOPED	Czech Republic	NA	CULTIVAR	49.571	13.526	0.002	0.001	0.994	0.002	0.002	NAM Parent
2590	9	30	Saint_Paul_Field_2015	PI253938	2-row	K1311	COLLECTED	Iraq	As Sulaymaniyah	LANDRACE	35.55	45.4333	0.382	0.252	0.223	0.033	0.11
2591	9	31	Saint_Paul_Field_2015	PI392451	2-row	Welgevallen 65-31-37	DEVELOPED	South Africa	Cape Province	BREEDING	-33.612	23.281	0.375	0.004	0.579	0.039	0.003	NAM Parent
2592	9	32	Saint_Paul_Field_2015	PI573659	2-row	SN-8	COLLECTED	Georgia	NA	LANDRACE	42.7825	42.5405	0.088	0.429	0.3	0.047	0.136
2593	9	33	Saint_Paul_Field_2015	PI392515	2-row	Welgevallen 60-21-71A	DEVELOPED	South Africa	Cape Province	BREEDING	-32.858	19.48	0.653	0.009	0.32	0.016	0.002
2594	9	34	Saint_Paul_Field_2015	PI592240	2-row	Patriot	DEVELOPED	United Kingdom	England	CULTIVAR	52.11	-1.803	0.32	0.001	0.378	0.299	0.001
2595	9	35	Saint_Paul_Field_2015	PI498440	2-row	Weka	DEVELOPED	New Zealand	NA	CULTIVAR	-43.795	171.288	0.006	0.001	0.987	0.005	0.001
2596	9	36	Saint_Paul_Field_2015	PI640153	6-row	TX01D147	DEVELOPED	United States	Texas	BREEDING	32.3648	-97.7222	0.313	0.143	0.017	0.52	0.007
2597	9	37	Saint_Paul_Field_2015	PI327860	6-row	HOR 4182	COLLECTED	Turkmenistan	NA	LANDRACE	39.1671	59.3986	0.002	0.99	0.002	0.005	0.002	Secondary Check 2
2598	9	38	Saint_Paul_Field_2015	PI290316	6-row	Kama Kuro	COLLECTED	Hungary	Pest	UNCERTAIN	47.1773	19.2227	0.001	0.996	0.001	0.001	0.001
2599	9	39	Saint_Paul_Field_2015	CIho14219	6-row	4042	COLLECTED	Mongolia	NA	LANDRACE	46.8625	103.847	0.001	0.995	0.001	0.001	0.001
2600	9	40	Saint_Paul_Field_2015	PI225037	6-row	Heine Fl 0367/53	DEVELOPED	Germany	Lower Saxony	BREEDING	52.6367	9.84507	0.385	0.038	0.309	0.259	0.009
2601	9	41	Saint_Paul_Field_2015	PI61533	6-row	3995	COLLECTED	Mongolia	NA	LANDRACE	46.7952	103.417	0.002	0.99	0.002	0.002	0.005	NAM Parent
2602	9	42	Saint_Paul_Field_2015	PI270687	6-row	89	COLLECTED	Peru	Puno	LANDRACE	-16.2639	-70.38	0.888	0.031	0.006	0.069	0.006
2603	9	43	Saint_Paul_Field_2015	PI640095	6-row	TX02D310	DEVELOPED	United States	Texas	BREEDING	30.4453	-98.0227	0.039	0.312	0.005	0.639	0.005	NAM Parent
2604	9	44	Saint_Paul_Field_2015	PI467790	6-row	KVL 592	DEVELOPED	Denmark	NA	CULTIVAR	56.0614	9.2574	0.065	0.034	0.06	0.829	0.011
2605	9	45	Saint_Paul_Field_2015	PI605699	6-row	Mahigan	DEVELOPED	Canada	Alberta	CULTIVAR	53.6885	-116.368	0.188	0.103	0.179	0.514	0.016
2606	9	46	Saint_Paul_Field_2015	PI54915	6-row	Donnes	COLLECTED	Norway	Nordland	LANDRACE	66.2	12.5833	0.001	0.996	0.001	0.001	0.001	NAM Parent
2607	9	47	Saint_Paul_Field_2015	PI639999	6-row	TX99D302	DEVELOPED	United States	Texas	BREEDING	30.1164	-98.3516	0.024	0.041	0.005	0.898	0.032
2608	9	48	Saint_Paul_Field_2015	PI343714	6-row	2	COLLECTED	Saudi Arabia	NA	UNCERTAIN	24.2888	46.4463	0.23	0.368	0.112	0.006	0.284
2609	9	49	Saint_Paul_Field_2015	PI356775	6-row	MOR 187/7	COLLECTED	Morocco	NA	LANDRACE	33.364	-6.351	0.664	0.002	0.325	0.007	0.002
2610	9	50	Saint_Paul_Field_2015	PI190790	6-row	Inumo O	COLLECTED	Korea, North	NA	LANDRACE	40.607	127.241	0.003	0.181	0.002	0.812	0.001	NAM Parent
2611	9	51	Saint_Paul_Field_2015	PI328976	6-row	S 139	COLLECTED	Ethiopia	NA	LANDRACE	9.145	40.4897	0.005	0.053	0.447	0.492	0.002
2612	9	52	Saint_Paul_Field_2015	PI29004	6-row	Turkestan	COLLECTED	Turkmenistan	Mary	LANDRACE	37.6307	62.2474	0.002	0.992	0.002	0.002	0.002
2613	9	53	Saint_Paul_Field_2015	CIho4050	6-row	4021	COLLECTED	Mongolia	Govi-Altay	LANDRACE	46.3745	94.7988	0.008	0.692	0.005	0.291	0.005	NAM Parent
2614	9	54	Saint_Paul_Field_2015	PI361914	6-row	Afghanistan 600	COLLECTED	Romania	Brasov	UNCERTAIN	45.75	25.3333	0.183	0.222	0.245	0.342	0.007
2615	9	55	Saint_Paul_Field_2015	CIho4069	6-row	4014	COLLECTED	Mongolia	Govi-Altay	LANDRACE	46.5167	96.3333	0.01	0.924	0.004	0.004	0.058
2616	9	56	Saint_Paul_Field_2015	PI402078	6-row	MCU 3600	COLLECTED	Colombia	Cundinamarca	UNCERTAIN	4.92522	-74.1029	0.358	0.003	0.208	0.424	0.007
2617	9	57	Saint_Paul_Field_2015	CIho15310	6-row	Djebali	COLLECTED	Tunisia	Kebili	LANDRACE	34.0159	8.45477	0.943	0.009	0.004	0.005	0.039
2618	9	58	Saint_Paul_Field_2015	PI640167	6-row	TX01D161	DEVELOPED	United States	Texas	BREEDING	30.6305	-97.8375	0.128	0.035	0.061	0.766	0.009
2619	9	59	Saint_Paul_Field_2015	PI415012	6-row	Centinela	DEVELOPED	Mexico	Federal District	CULTIVAR	19.5781	-99.3572	0.622	0.003	0.146	0.222	0.007
2620	9	60	Saint_Paul_Field_2015	PI330513	6-row	Coeleste	DONATED	United Kingdom	England	UNCERTAIN	52.8449	-1.14906	0.044	0.373	0.004	0.575	0.003
2621	9	61	Saint_Paul_Field_2015	PI298708	6-row	ELS 6402-317	COLLECTED	Ethiopia	Kefa	LANDRACE	7.73333	36.5833	0.001	0.001	0.001	0.001	0.997	NAM Parent
2622	9	62	Saint_Paul_Field_2015	CIho10036	6-row	Jadar II	DEVELOPED	Norway	NA	CULTIVAR	62.423	10.245	0.004	0.002	0.005	0.986	0.003
2623	9	63	Saint_Paul_Field_2015	PI328155	6-row	HOR 384	COLLECTED	Bulgaria	NA	LANDRACE	42.7339	25.4858	0.147	0.002	0.003	0.847	0.001	NAM Parent
2624	9	64	Saint_Paul_Field_2015	PI382911	2-row	GAW 72-8	COLLECTED	Ethiopia	Tigre	LANDRACE	14.1346	39.4287	0.002	0.001	0.001	0.002	0.994	Looks 2-row in field. Characterized as 6-row in GrainGenes and "IRREGULARE: 2 AND 6 CHARACTERS ON THE SAME SPIKE" in GRIN database. Categorized as 6-row in Muñoz-Amatriaín et al. 2014.
2625	9	65	Saint_Paul_Field_2015	PI182684	6-row	Khashabi	COLLECTED	Syria	Hims	LANDRACE	34.7333	36.7167	0.866	0.007	0.013	0.107	0.006
2626	9	66	Saint_Paul_Field_2015	CIho6294	6-row	CI 6294	COLLECTED	Turkey	Malatya	LANDRACE	38.3533	38.3119	0.381	0.014	0.056	0.544	0.006	NAM Parent
2627	9	67	Saint_Paul_Field_2015	PI57752	6-row	Good Delta	COLLECTED	Egypt	Sharqiya	LANDRACE	30.8	31.8	0.628	0.241	0.005	0.003	0.123
2628	9	68	Saint_Paul_Field_2015	PI61589	6-row	4077	COLLECTED	Mongolia	NA	LANDRACE	47.1176	104.102	0.001	0.995	0.001	0.001	0.001
2629	9	69	Saint_Paul_Field_2015	PI452324	6-row	STB 32	DEVELOPED	United Kingdom	England	BREEDING	52.1369	-1.23463	0.651	0.111	0.223	0.011	0.004
2630	9	70	Saint_Paul_Field_2015	PI467654	6-row	Kuoreton	COLLECTED	Finland	NA	UNCERTAIN	61.5147	26.2285	0.037	0.338	0.009	0.605	0.01
2631	10	70	Saint_Paul_Field_2015	PI592797	6-row	AC Stacey	DEVELOPED	Canada	Alberta	CULTIVAR	54.1838	-116.381	0.344	0.002	0.208	0.443	0.004
2632	10	69	Saint_Paul_Field_2015	PI434814	6-row	QB 714.5	DEVELOPED	Canada	Quebec	BREEDING	53.0647	-73.4292	0.002	0.003	0.015	0.977	0.002
2633	10	68	Saint_Paul_Field_2015	CIho10033	6-row	Varde	DEVELOPED	Norway	NA	CULTIVAR	62.219	9.014	0.001	0.001	0.002	0.995	0.001
2634	10	67	Saint_Paul_Field_2015	PI174496	6-row	Maroccaine 0139	DEVELOPED	Morocco	NA	CULTIVAR	33.9175	-6.93063	0.991	0.002	0.003	0.003	0.001
2635	10	66	Saint_Paul_Field_2015	PI269912	6-row	880	COLLECTED	Pakistan	North-West Frontier	LANDRACE	36.0833	72.05	0.014	0.953	0.016	0.006	0.011
2636	10	65	Saint_Paul_Field_2015	PI329008	6-row	Mansholts Groninger	DEVELOPED	Netherlands	Groningen	CULTIVAR	53.216	6.566	0.343	0.007	0.008	0.641	0.002
2637	10	64	Saint_Paul_Field_2015	CIho14234	6-row	4000	COLLECTED	Mongolia	NA	LANDRACE	47.0709	104.055	0.002	0.988	0.001	0.002	0.007
2638	10	63	Saint_Paul_Field_2015	PI632274	6-row	Creel	DEVELOPED	United States	Idaho	CULTIVAR	44.1182	114.792	0.173	0.008	0.004	0.804	0.011
2639	10	62	Saint_Paul_Field_2015	PI327977	6-row	Bigo	DEVELOPED	Netherlands	NA	CULTIVAR	52.1152	5.25151	0.005	0.004	0.005	0.977	0.009
2640	10	61	Saint_Paul_Field_2015	PI565786	6-row	Hua Chuan Pi 4 Hao	COLLECTED	China	Heilongjiang	CULTIVATED	48	128	0.01	0.013	0.006	0.966	0.005
2641	10	60	Saint_Paul_Field_2015	CIho1551	6-row	Albert	DEVELOPED	Canada	Ontario	CULTIVAR	NA	NA	NA	NA	NA	NA	NA	Excluded from GWAS due to high amounts of missing SNP data or heterozygosity.
2642	10	59	Saint_Paul_Field_2015	PI328484	6-row	HOR 1129	COLLECTED	Greece	Crete	LANDRACE	35.1667	25	0.962	0.018	0.014	0.003	0.004
2643	10	58	Saint_Paul_Field_2015	CIho10260	6-row	Iwate Selection	COLLECTED	Japan	NA	BREEDING	36.2048	138.253	0.103	0.38	0.003	0.511	0.002
2644	10	57	Saint_Paul_Field_2015	PI402445	6-row	MCU 3967	COLLECTED	Colombia	Cundinamarca	UNCERTAIN	5.3054	-73.8914	0.512	0.005	0.325	0.047	0.111
2645	10	56	Saint_Paul_Field_2015	PI327860	6-row	HOR 4182	COLLECTED	Turkmenistan	NA	LANDRACE	39.1671	59.3986	0.002	0.99	0.002	0.005	0.002	Secondary Check 1
2646	10	55	Saint_Paul_Field_2015	PI640295	6-row	TX01D292	DEVELOPED	United States	Texas	BREEDING	32.3822	-99.8075	0.406	0.116	0.003	0.466	0.008
2647	10	54	Saint_Paul_Field_2015	CIho15362	6-row	Jebali	COLLECTED	Tunisia	Bizerte	LANDRACE	NA	NA	NA	NA	NA	NA	NA	Excluded from GWAS due to high amounts of missing SNP data or heterozygosity. NAM Parent.
2648	10	53	Saint_Paul_Field_2015	PI231161	6-row	II-871-5B	DEVELOPED	Colombia	Cundinamarca	BREEDING	5.3653	-74.3803	0.372	0.003	0.312	0.31	0.003
2649	10	52	Saint_Paul_Field_2015	PI71075	6-row	10247	DEVELOPED	Uzbekistan	Tashkent	BREEDING	41.2995	69.2401	0.347	0.002	0.003	0.645	0.003	NAM Parent
2650	10	51	Saint_Paul_Field_2015	PI356711	6-row	MOR 11/6	COLLECTED	Morocco	NA	LANDRACE	31.8417	7.1426	0.048	0.04	0.007	0.031	0.874
2651	10	50	Saint_Paul_Field_2015	CIho14268	6-row	Wang Ta Mai	COLLECTED	China	Beijing	LANDRACE	40.1738	116.495	0.002	0.991	0.002	0.002	0.004
2652	10	49	Saint_Paul_Field_2015	PI410451	6-row	C18A	COLLECTED	Pakistan	Azad Kashmir	LANDRACE	36.3167	74.8833	0.005	0.963	0.003	0.004	0.026	NAM Parent
2653	10	48	Saint_Paul_Field_2015	PI532024	6-row	2824	COLLECTED	Egypt	NA	UNCERTAIN	27.3146	30.6732	0.491	0.27	0.007	0.005	0.227
2654	10	47	Saint_Paul_Field_2015	PI402322	6-row	MCU 3844	COLLECTED	Colombia	Cundinamarca	UNCERTAIN	5.48169	-74.5845	0.268	0.002	0.076	0.65	0.003
2655	10	46	Saint_Paul_Field_2015	PI640170	6-row	TX01D164	DEVELOPED	United States	Texas	BREEDING	32.3135	-97.7735	0.07	0.069	0.167	0.683	0.012
2656	10	45	Saint_Paul_Field_2015	PI572588	6-row	Ali	COLLECTED	China	Shaanxi	CULTIVAR	35	109	0.365	0.092	0.133	0.378	0.031
2657	10	44	Saint_Paul_Field_2015	PI157892	6-row	Maranini	COLLECTED	Italy	Latium	UNCERTAIN	42.2911	12.3446	0.813	0.006	0.003	0.003	0.175
2658	10	43	Saint_Paul_Field_2015	PI467732	6-row	Tunga	DEVELOPED	Norway	NA	CULTIVAR	60.822	8.8189	0.003	0.002	0.149	0.844	0.002
2659	10	42	Saint_Paul_Field_2015	PI361695	6-row	Lapinohra	DEVELOPED	Finland	NA	CULTIVAR	62.7092	26.5333	0.002	0.002	0.019	0.975	0.003
2660	10	41	Saint_Paul_Field_2015	PI61342	6-row	CIho 3199	DEVELOPED	Japan	Hokkaido	BREEDING	NA	NA	NA	NA	NA	NA	NA	Excluded from GWAS due to high amounts of missing SNP data or heterozygosity.
2661	10	40	Saint_Paul_Field_2015	PI237571	6-row	II-373-1B-4B-1T-1-13B	DEVELOPED	Colombia	Cundinamarca	BREEDING	5.0277	-73.8149	0.306	0.003	0.249	0.441	0.002
2662	10	39	Saint_Paul_Field_2015	CIho16516	6-row	Isogenic: rr White Aleurone	DEVELOPED	United States	Montana	GENETIC	46.667	-109.35	0.045	0.016	0.041	0.895	0.003
2663	10	38	Saint_Paul_Field_2015	CIho5057	6-row	Malebo	DEVELOPED	Australia	New South Wales	CULTIVAR	31.2532	146.921	0.13	0.837	0.02	0.007	0.006
2664	10	37	Saint_Paul_Field_2015	PI178609	6-row	4633	COLLECTED	Turkey	Amasya	LANDRACE	40.6667	35.8333	0.333	0.003	0.006	0.656	0.004	NAM Parent
2665	10	36	Saint_Paul_Field_2015	CIho14228	6-row	3918	COLLECTED	Mongolia	NA	LANDRACE	47.1992	104.183	0.002	0.988	0.006	0.002	0.002	NAM Parent
2666	10	35	Saint_Paul_Field_2015	PI347750	2-row	CIho 15007	DEVELOPED	France	Puy-de-Dome	BREEDING	45.734	3.129	0.051	0.011	0.918	0.003	0.017	NAM Parent
2667	10	34	Saint_Paul_Field_2015	PI268158	2-row	Da Caffe	COLLECTED	Czech Republic	South Moravia	UNCERTAIN	49.1667	16.6667	0.005	0.002	0.985	0.005	0.002	NAM Parent
2668	10	33	Saint_Paul_Field_2015	PI182687	2-row	White Charki	COLLECTED	Syria	Hamah	LANDRACE	35.1333	36.75	0.343	0.266	0.211	0.014	0.167
2669	10	32	Saint_Paul_Field_2015	PI592173	2-row	Doubloon	DEVELOPED	United Kingdom	Wales	CULTIVAR	51.887	-4.386	0.009	0.004	0.979	0.004	0.004	NAM Parent
2670	10	31	Saint_Paul_Field_2015	PI467847	2-row	FM 434	DEVELOPED	Brazil	Rio Grande do Sul	CULTIVAR	-30.119	-50.913	0.118	0.004	0.841	0.019	0.018
2671	10	30	Saint_Paul_Field_2015	PI467842	2-row	Alpha 1959	DEVELOPED	Brazil	NA	CULTIVAR	-6.183	-39.955	0.026	0.016	0.499	0.457	0.002	NAM Parent
2672	10	29	Saint_Paul_Field_2015	PI189764	2-row	Heimdal	DEVELOPED	Sweden	Malmohus	CULTIVAR	55.571	13.019	0.001	0.001	0.994	0.002	0.001	NAM Parent
2673	10	28	Saint_Paul_Field_2015	PI392464	2-row	Welgevallen 62-13-6	DEVELOPED	South Africa	Cape Province	BREEDING	-32.581	20.051	0.241	0.002	0.753	0.002	0.002	NAM Parent
2674	10	27	Saint_Paul_Field_2015	PI436136	2-row	17	COLLECTED	Chile	La Araucania	LANDRACE	-38.6667	-72.4833	0.012	0.007	0.931	0.047	0.003	NAM Parent
2675	10	26	Saint_Paul_Field_2015	PI366439	2-row	1081	COLLECTED	Afghanistan	Ghowr	LANDRACE	34.5519	65.7864	0.129	0.489	0.25	0.007	0.126
2676	10	25	Saint_Paul_Field_2015	PI290234	2-row	Hatvani 45/25	DEVELOPED	Hungary	Heves	CULTIVAR	47.8245	20.2049	0.02	0.159	0.42	0.394	0.007
2677	10	24	Saint_Paul_Field_2015	PI392520	2-row	Welgevallen 60-19-59	DEVELOPED	South Africa	Cape Province	BREEDING	-28.6167	21.396	0.647	0.012	0.323	0.016	0.002
2678	10	23	Saint_Paul_Field_2015	PI321823	2-row	Proskovcuv Hanacky	DEVELOPED	Czechoslovakia	NA	CULTIVAR	48.607	17.206	0.002	0.001	0.883	0.111	0.002	NAM Parent
2679	10	22	Saint_Paul_Field_2015	PI411030	6-row	Akyurek 32	DEVELOPED	Turkey	Ankara	BREEDING	39.947	32.871	0.267	0.094	0.009	0.626	0.003	Looks 6-row in field. Categorized as 2-row in GrainGenes and Muñoz-Amatriaín et al. 2014. Categorized as 6-row in GRIN.
2680	10	21	Saint_Paul_Field_2015	PI592250	2-row	Totem	DEVELOPED	United Kingdom	England	CULTIVAR	52.151	-3.23	0.047	0.005	0.91	0.006	0.032	NAM Parent
2681	10	20	Saint_Paul_Field_2015	CIho14752	2-row	Freak	DEVELOPED	United States	Idaho	GENETIC	43.7686	-114.519	0.247	0.353	0.054	0.24	0.105	NAM Parent. Replaced line that did not flower in 2014.
2682	10	19	Saint_Paul_Field_2015	PI573668	2-row	SN-71	COLLECTED	Georgia	NA	LANDRACE	43.4333	43.1016	0.122	0.484	0.275	0.02	0.098
2683	10	18	Saint_Paul_Field_2015	PI330520	2-row	Nigricans	DONATED	United Kingdom	England	UNCERTAIN	52.78	-1.65	0.001	0.003	0.002	0.002	0.992
2684	10	17	Saint_Paul_Field_2015	PI573703	2-row	SN-2738a	COLLECTED	Georgia	NA	LANDRACE	41.7231	42.9964	0.112	0.364	0.329	0.01	0.185
2685	10	16	Saint_Paul_Field_2015	PI346387	2-row	Malteria Heda	DEVELOPED	Argentina	Buenos Aires	CULTIVAR	-35.089	-58.01	0.107	0.002	0.881	0.003	0.006	NAM Parent
2686	10	15	Saint_Paul_Field_2015	PI466726	2-row	Mona	DEVELOPED	Sweden	Malmohus	CULTIVAR	55.57	13.079	0.023	0.038	0.604	0.329	0.006
2687	10	14	Saint_Paul_Field_2015	PI608763	2-row	Washonupana	DEVELOPED	United States	Montana	CULTIVAR	46.89	110.36	0.104	0.075	0.624	0.184	0.012
2688	10	13	Saint_Paul_Field_2015	PI467749	2-row	Menuet	DEVELOPED	Netherlands	NA	CULTIVAR	53.027	6.098	0.007	0.003	0.973	0.003	0.014	NAM Parent
2689	10	12	Saint_Paul_Field_2015	PI591928	2-row	Kaputar	DEVELOPED	Australia	New South Wales	CULTIVAR	-32.534	149.191	0.236	0.017	0.689	0.015	0.043	NAM Parent
2690	10	11	Saint_Paul_Field_2015	PI268255	2-row	52	COLLECTED	Iran	Fars	LANDRACE	29.9406	51.614	0.284	0.347	0.182	0.017	0.17
2691	10	10	Saint_Paul_Field_2015	PI386406	2-row	IAR/B/252	COLLECTED	Eritrea	NA	LANDRACE	15.3969	38.8716	0.001	0.001	0.002	0.001	0.995
2692	10	9	Saint_Paul_Field_2015	PI296995	2-row	B.273-0-15-000	DEVELOPED	Argentina	Buenos Aires	BREEDING	35.0063	58.7842	0.188	0.628	0.177	0.004	0.003
2693	10	8	Saint_Paul_Field_2015	PI447051	2-row	NA	DEVELOPED	Spain	Zaragoza	BREEDING	41.6701	-1.19396	0.649	0.006	0.327	0.009	0.009
2694	10	7	Saint_Paul_Field_2015	PI371017	2-row	779F	COLLECTED	Switzerland	Bern	LANDRACE	46.7305	8.01924	0.006	0.005	0.587	0.386	0.016
2695	10	6	Saint_Paul_Field_2015	PI643391	2-row	ND22942	DEVELOPED	United States	North Dakota	BREEDING	47.4924	-101.15	0.026	0.114	0.565	0.263	0.033
2696	10	5	Saint_Paul_Field_2015	PI467416	2-row	Jarohnevicky	DEVELOPED	Czechoslovakia	NA	CULTIVAR	49.8454	14.475	0.004	0.001	0.963	0.03	0.002	NAM Parent
2697	10	4	Saint_Paul_Field_2015	PI328938	2-row	Noire Maroc	COLLECTED	Morocco	NA	UNCERTAIN	31.9501	-6.96943	0.005	0.608	0.26	0.005	0.123
2698	10	3	Saint_Paul_Field_2015	PI285118	2-row	S-36	COLLECTED	Eritrea	NA	LANDRACE	16.582	38.727	0.025	0.002	0.955	0.014	0.003	NAM Parent
2699	10	2	Saint_Paul_Field_2015	PI371248	2-row	1809A	COLLECTED	Switzerland	Graubunden	LANDRACE	46.7333	9.4	0.003	0.047	0.514	0.414	0.021	NAM Parent
2700	10	1	Saint_Paul_Field_2015	PI467422	2-row	Stupicky Hanacky	DEVELOPED	Czechoslovakia	NA	CULTIVAR	49.3533	15.0241	0.004	0.002	0.861	0.13	0.002	NAM Parent
2701	11	1	Saint_Paul_Field_2015	PI321854	2-row	Zagreb 48	DEVELOPED	Croatia	NA	CULTIVAR	45.027	14.687	0.042	0.003	0.611	0.342	0.002	NAM Parent
2702	11	2	Saint_Paul_Field_2015	PI310480	2-row	Finistere 62-3	COLLECTED	France	NA	UNCERTAIN	47.914	3.727	0.041	0.004	0.555	0.394	0.006
2703	11	3	Saint_Paul_Field_2015	Conlon	2-row	Conlon	DEVELOPED	United States	South Dakota	CULTIVAR	NA	NA	NA	NA	NA	NA	NA	Primary Check
2704	11	4	Saint_Paul_Field_2015	PI350715	2-row	69Z108.179	COLLECTED	Austria	Salzburg	LANDRACE	47.15	13.5	0.004	0.008	0.463	0.507	0.018
2705	11	5	Saint_Paul_Field_2015	PI402016	2-row	MCU 3538	COLLECTED	Colombia	Cundinamarca	UNCERTAIN	4.86262	-73.7895	0.506	0.007	0.06	0.422	0.006
2706	11	6	Saint_Paul_Field_2015	PI643310	2-row	ND17274	DEVELOPED	United States	North Dakota	BREEDING	47.3222	-100.699	0.004	0.005	0.601	0.373	0.017
2707	11	7	Saint_Paul_Field_2015	PI361038	2-row	Ymer Ida 18 Selection	DEVELOPED	United Kingdom	England	BREEDING	52.3976	-1.41378	0.001	0.001	0.99	0.003	0.004	NAM Parent
2708	11	8	Saint_Paul_Field_2015	Conlon	2-row	Conlon	DEVELOPED	United States	South Dakota	CULTIVAR	NA	NA	NA	NA	NA	NA	NA	Primary Check
2709	11	9	Saint_Paul_Field_2015	PI643369	2-row	ND23117	DEVELOPED	United States	North Dakota	BREEDING	48.0406	-100.778	0.069	0.012	0.497	0.368	0.054
2710	11	10	Saint_Paul_Field_2015	PI345615	2-row	Kombajner	DEVELOPED	Latvia	NA	CULTIVAR	57.284	22.781	0.002	0.002	0.824	0.169	0.003
2711	11	11	Saint_Paul_Field_2015	PI274620	2-row	Mutans Boryna	DEVELOPED	Poland	NA	CULTIVAR	52.999	20.053	0.001	0.001	0.996	0.001	0.001	NAM Parent
2712	11	12	Saint_Paul_Field_2015	PI584962	2-row	Mi Mai 114	COLLECTED	China	Zhejiang	LANDRACE	28.6904	119.977	0.013	0.359	0.475	0.147	0.006	Secondary Check 2
2713	11	13	Saint_Paul_Field_2015	Conlon	2-row	Conlon	DEVELOPED	United States	South Dakota	CULTIVAR	NA	NA	NA	NA	NA	NA	NA	Primary Check
2714	11	14	Saint_Paul_Field_2015	PI592169	2-row	Regent	DEVELOPED	United Kingdom	Wales	CULTIVAR	52.165	-4.21	0.037	0.003	0.936	0.003	0.021
2715	11	15	Saint_Paul_Field_2015	PI566574	2-row	E Liang 3040	COLLECTED	China	Hubei	CULTIVATED	31	112	0.037	0.003	0.627	0.329	0.004
2716	11	16	Saint_Paul_Field_2015	PI436149	2-row	242	COLLECTED	Chile	La Araucania	LANDRACE	-38.7	-73.2833	0.001	0.001	0.995	0.001	0.001	NAM Parent
2717	11	17	Saint_Paul_Field_2015	PI548761	2-row	Jerusalem II	DEVELOPED	Israel	NA	CULTIVAR	31.1136	34.696	0.554	0.172	0.013	0.055	0.206
2718	11	18	Saint_Paul_Field_2015	Conlon	2-row	Conlon	DEVELOPED	United States	South Dakota	CULTIVAR	NA	NA	NA	NA	NA	NA	NA	Primary Check
2719	11	19	Saint_Paul_Field_2015	PI386844	2-row	IAR/B/57	COLLECTED	Ethiopia	Tigre	LANDRACE	14.1	38.5	0.001	0.002	0.001	0.002	0.994
2720	11	20	Saint_Paul_Field_2015	PI182662	2-row	Bikai	COLLECTED	Lebanon	El Beqaa	LANDRACE	33.7619	35.8803	0.381	0.244	0.177	0.013	0.185
2721	11	21	Saint_Paul_Field_2015	PI486152	2-row	Kyle	COLLECTED	Zimbabwe	NA	CULTIVAR	-19.832	30.345	0.069	0.002	0.921	0.003	0.005	NAM Parent
2722	11	22	Saint_Paul_Field_2015	PI327676	2-row	Unumli-Arpa	DEVELOPED	Uzbekistan	NA	CULTIVAR	41.39	64.6	0.308	0.006	0.298	0.195	0.194
2723	11	23	Saint_Paul_Field_2015	Conlon	2-row	Conlon	DEVELOPED	United States	South Dakota	CULTIVAR	NA	NA	NA	NA	NA	NA	NA	Primary Check
2724	11	24	Saint_Paul_Field_2015	PI611472	2-row	Martonvasari 50	DEVELOPED	Hungary	Budapest	CULTIVAR	47.496	18.893	0.277	0.139	0.104	0.007	0.473
2725	11	25	Saint_Paul_Field_2015	PI591926	2-row	Arapiles	DEVELOPED	Australia	Victoria	CULTIVAR	-36.921	142.994	0.121	0.005	0.858	0.013	0.003
2726	11	26	Saint_Paul_Field_2015	PI611555	2-row	Novoomskii	DEVELOPED	Russian Federation	Omsk	CULTIVAR	54.9885	73.3242	0.014	0.141	0.449	0.316	0.08
2727	11	27	Saint_Paul_Field_2015	PI337144	2-row	Magnif 131	DEVELOPED	Argentina	Buenos Aires	CULTIVAR	-35.008	-59.521	0.255	0.002	0.737	0.004	0.003
2728	11	28	Saint_Paul_Field_2015	Conlon	2-row	Conlon	DEVELOPED	United States	South Dakota	CULTIVAR	NA	NA	NA	NA	NA	NA	NA	Primary Check
2729	11	29	Saint_Paul_Field_2015	PI374420	2-row	10/71-10	COLLECTED	Bosnia and Herzegovina	NA	LANDRACE	44.1436	17.4	0.003	0.001	0.792	0.202	0.002
2730	11	30	Saint_Paul_Field_2015	PI392471	2-row	Welgevallen 65-52-2	DEVELOPED	South Africa	Cape Province	BREEDING	-33.171	22.907	0.356	0.002	0.636	0.004	0.002
2731	11	31	Saint_Paul_Field_2015	PI316801	2-row	HOR 2541	COLLECTED	Ethiopia	NA	LANDRACE	9.4	39.58	0.001	0.003	0.002	0.002	0.992
2732	11	32	Saint_Paul_Field_2015	PI304912	2-row	Esperance	COLLECTED	Morocco	NA	CULTIVAR	31.9698	-7.34508	0.506	0.225	0.046	0.017	0.207
2733	11	33	Saint_Paul_Field_2015	Conlon	2-row	Conlon	DEVELOPED	United States	South Dakota	CULTIVAR	NA	NA	NA	NA	NA	NA	NA	Primary Check
2734	11	34	Saint_Paul_Field_2015	PI643244	2-row	ND7556	DEVELOPED	United States	North Dakota	BREEDING	46.3829	-99.8433	0.003	0.004	0.578	0.402	0.013
2735	11	35	Saint_Paul_Field_2015	PI467375	2-row	Brehat	COLLECTED	France	Cotes-du-Nord	LANDRACE	48.85	-3	0.053	0.041	0.593	0.309	0.004
2736	11	36	Saint_Paul_Field_2015	CIho4176	6-row	5983	COLLECTED	Afghanistan	Baghlan	LANDRACE	NA	NA	NA	NA	NA	NA	NA	Excluded from GWAS due to high amounts of missing SNP data or heterozygosity.
2737	11	37	Saint_Paul_Field_2015	CIho15591	6-row	QB 139.1	DEVELOPED	Canada	Quebec	BREEDING	53.1543	-73.3396	0.007	0.004	0.004	0.733	0.252
2738	11	38	Saint_Paul_Field_2015	Rasmussen	6-row	Rasmussen	DEVELOPED	United States	South Dakota	CULTIVAR	NA	NA	NA	NA	NA	NA	NA	Primary Check
2739	11	39	Saint_Paul_Field_2015	PI152256	6-row	Lignee 185 de Gembloux	DEVELOPED	Belgium	Namur	CULTIVAR	NA	NA	NA	NA	NA	NA	NA	Excluded from GWAS due to high amounts of missing SNP data or heterozygosity.
2740	11	40	Saint_Paul_Field_2015	CIho4188	6-row	6089	COLLECTED	Afghanistan	Kabul	LANDRACE	NA	NA	NA	NA	NA	NA	NA	Excluded from GWAS due to high amounts of missing SNP data or heterozygosity.
2741	11	41	Saint_Paul_Field_2015	PI566497	6-row	Lu Quan 5 Hao	COLLECTED	China	Yunnan	CULTIVATED	24	101	0.271	0.003	0.112	0.558	0.056
2742	11	42	Saint_Paul_Field_2015	PI434741	6-row	QB 702.1	DEVELOPED	Canada	Quebec	BREEDING	53.0197	-73.4742	0.004	0.004	0.003	0.987	0.002
2743	11	43	Saint_Paul_Field_2015	Rasmussen	6-row	Rasmussen	DEVELOPED	United States	South Dakota	CULTIVAR	NA	NA	NA	NA	NA	NA	NA	Primary Check
2744	11	44	Saint_Paul_Field_2015	PI76284	6-row	B-87	COLLECTED	Iraq	Baghdad	LANDRACE	33.4443	44.1423	0.167	0.655	0.01	0.007	0.161
2745	11	45	Saint_Paul_Field_2015	PI182726	6-row	10382	COLLECTED	Turkey	Kars	LANDRACE	39.9333	44.0333	0.113	0.63	0.145	0.008	0.104
2746	11	46	Saint_Paul_Field_2015	PI129466	6-row	10345 Z Mandzurji	COLLECTED	Soviet Union	Former	BREEDING	61.55	105.35	0.001	0.994	0.001	0.002	0.001
2747	11	47	Saint_Paul_Field_2015	PI640006	6-row	TX99D684	DEVELOPED	United States	Texas	BREEDING	32.547	-97.54	0.068	0.122	0.128	0.679	0.004
2748	11	48	Saint_Paul_Field_2015	Rasmussen	6-row	Rasmussen	DEVELOPED	United States	South Dakota	CULTIVAR	NA	NA	NA	NA	NA	NA	NA	Primary Check
2749	11	49	Saint_Paul_Field_2015	CIho15803	6-row	FL7138A3-102	DEVELOPED	United States	Florida	BREEDING	27.6648	-81.5157	0.355	0.181	0.023	0.251	0.189
2750	11	50	Saint_Paul_Field_2015	PI250365	6-row	K483	COLLECTED	Pakistan	Punjab	LANDRACE	33.529	73.63	0.153	0.728	0.01	0.008	0.102
2751	11	51	Saint_Paul_Field_2015	PI76285	6-row	B-94	COLLECTED	Iraq	Baghdad	LANDRACE	33.6534	44.1913	0.189	0.591	0.034	0.024	0.161
2752	11	52	Saint_Paul_Field_2015	CIho15290	6-row	Djebali	COLLECTED	Tunisia	Bizerte	LANDRACE	36.4711	10.2795	0.763	0.09	0.006	0.025	0.117
2753	11	53	Saint_Paul_Field_2015	Rasmussen	6-row	Rasmussen	DEVELOPED	United States	South Dakota	CULTIVAR	NA	NA	NA	NA	NA	NA	NA	Primary Check
2754	11	54	Saint_Paul_Field_2015	PI564468	6-row	Vejen Kt-2031	COLLECTED	Bulgaria	Plovdiv	CULTIVAR	42.605	24.3082	0.454	0.003	0.074	0.467	0.002
2755	11	55	Saint_Paul_Field_2015	PI356715	6-row	MOR 12/2	COLLECTED	Morocco	NA	LANDRACE	31.8968	6.75669	0.001	0.001	0.001	0.001	0.995
2756	11	56	Saint_Paul_Field_2015	PI294731	6-row	Komono	COLLECTED	Bulgaria	NA	UNCERTAIN	42.74	25.49	0.001	0.995	0.001	0.001	0.001
2757	11	57	Saint_Paul_Field_2015	PI410483	6-row	N50	COLLECTED	Pakistan	Azad Kashmir	LANDRACE	35.45	74.8	0.011	0.941	0.002	0.003	0.043	NAM Parent
2758	11	58	Saint_Paul_Field_2015	Rasmussen	6-row	Rasmussen	DEVELOPED	United States	South Dakota	CULTIVAR	NA	NA	NA	NA	NA	NA	NA	Primary Check
2759	11	59	Saint_Paul_Field_2015	CIho14260	6-row	6067	COLLECTED	Afghanistan	Herat	LANDRACE	33.3036	62.14	0.004	0.972	0.003	0.002	0.019
2760	11	60	Saint_Paul_Field_2015	PI344865	6-row	6	COLLECTED	Serbia	NA	LANDRACE	43.9915	20.898	0.091	0.003	0.004	0.898	0.003
2761	11	61	Saint_Paul_Field_2015	PI76296	6-row	B-90	COLLECTED	Iraq	Baghdad	LANDRACE	32.9703	44.4609	0.22	0.558	0.006	0.005	0.211
2762	11	62	Saint_Paul_Field_2015	PI387098	6-row	IAR/B/328-3	COLLECTED	Ethiopia	Shewa	LANDRACE	8.91667	38.65	0.001	0.001	0.001	0.001	0.996	NAM Parent
2763	11	63	Saint_Paul_Field_2015	Rasmussen	6-row	Rasmussen	DEVELOPED	United States	South Dakota	CULTIVAR	NA	NA	NA	NA	NA	NA	NA	Primary Check
2764	11	64	Saint_Paul_Field_2015	PI174497	6-row	Maroccaine 0187	DEVELOPED	Morocco	NA	CULTIVAR	34.784	-4.087	0.989	0.003	0.002	0.003	0.003
2765	11	65	Saint_Paul_Field_2015	PI434794	6-row	QB 709.4	DEVELOPED	Canada	Quebec	BREEDING	52.9823	-73.5116	0.004	0.003	0.007	0.984	0.002	NAM Parent
2766	11	66	Saint_Paul_Field_2015	PI237580	6-row	Surprise-II-750-3B-1B-1-7T	DEVELOPED	Colombia	Cundinamarca	BREEDING	5.07145	-74.1946	0.495	0.002	0.263	0.239	0.002
2767	11	67	Saint_Paul_Field_2015	PI640376	6-row	TX01D373	DEVELOPED	United States	Texas	BREEDING	30.2377	-98.2303	0.256	0.019	0.004	0.706	0.015	NAM Parent
2768	11	68	Saint_Paul_Field_2015	Rasmussen	6-row	Rasmussen	DEVELOPED	United States	South Dakota	CULTIVAR	NA	NA	NA	NA	NA	NA	NA	Primary Check
2769	11	69	Saint_Paul_Field_2015	CIho14258	6-row	6065	COLLECTED	Afghanistan	Nimruz	LANDRACE	30.5	62	0.055	0.932	0.003	0.006	0.004	NAM Parent
2770	11	70	Saint_Paul_Field_2015	PI410522	6-row	N90B	COLLECTED	Pakistan	Azad Kashmir	LANDRACE	35.3	75.7667	0.027	0.27	0.514	0.175	0.014
2771	12	70	Saint_Paul_Field_2015	PI223146	6-row	Nabawi	COLLECTED	Jordan	NA	UNCERTAIN	30.5852	36.2384	0.43	0.299	0.028	0.215	0.028
2772	12	69	Saint_Paul_Field_2015	PI220659	6-row	335	COLLECTED	Afghanistan	Parwan	LANDRACE	34.9833	68.7333	0.052	0.626	0.224	0.008	0.09
2773	12	68	Saint_Paul_Field_2015	CIho13743	6-row	CI 13743	COLLECTED	Eritrea	Asmara	LANDRACE	15.3399	39.4055	0.001	0.001	0.001	0.001	0.996	NAM Parent
2774	12	67	Saint_Paul_Field_2015	PI467740	6-row	Puebla	DEVELOPED	Mexico	NA	CULTIVAR	NA	NA	NA	NA	NA	NA	NA	Excluded from GWAS due to high amounts of missing SNP data or heterozygosity.
2775	12	66	Saint_Paul_Field_2015	CIho6496	6-row	CI 6496	COLLECTED	China	Xizang	UNCERTAIN	32	90	0.404	0.195	0.314	0.054	0.034
2776	12	65	Saint_Paul_Field_2015	PI244823	6-row	5068	COLLECTED	Pakistan	Northern Areas	LANDRACE	36	75	0.004	0.975	0.002	0.005	0.014
2777	12	64	Saint_Paul_Field_2015	PI87844	6-row	Kubi	COLLECTED	Korea, North	Hamgyong Puk	LANDRACE	42.272	129.955	0.002	0.434	0.001	0.556	0.006	NAM Parent
2778	12	63	Saint_Paul_Field_2015	CIho14124	6-row	473	COLLECTED	Ethiopia	Welo	LANDRACE	11.1333	39.6333	0.001	0.001	0.001	0.001	0.996
2779	12	62	Saint_Paul_Field_2015	PI327859	6-row	HOR 4181	COLLECTED	Turkmenistan	NA	LANDRACE	38.9697	59.5563	0.244	0.003	0.008	0.742	0.004	NAM Parent
2780	12	61	Saint_Paul_Field_2015	CIho10034	6-row	Herse	DEVELOPED	Norway	NA	CULTIVAR	NA	NA	NA	NA	NA	NA	NA	Excluded from GWAS due to high amounts of missing SNP data or heterozygosity. NAM Parent.
2781	12	60	Saint_Paul_Field_2015	PI42889	6-row	Saggia	COLLECTED	Sudan	Khartoum	UNCERTAIN	16.0063	32.1462	0.493	0.186	0.043	0.003	0.275
2782	12	59	Saint_Paul_Field_2015	PI573878	6-row	RNB-132	COLLECTED	Nepal	Dhawalagiri	LANDRACE	28.5833	83.3333	0.05	0.915	0.004	0.024	0.008	NAM Parent
2783	12	58	Saint_Paul_Field_2015	PI436144	6-row	108	COLLECTED	Chile	La Araucania	LANDRACE	-39.2167	-73.2333	0.993	0.001	0.002	0.001	0.002
2784	12	57	Saint_Paul_Field_2015	PI221326	6-row	Smooth Awn	COLLECTED	Serbia	NA	UNCERTAIN	44.0167	19.6167	0.066	0.287	0.06	0.584	0.003
2785	12	56	Saint_Paul_Field_2015	CIho7153	6-row	36Ab2568	DEVELOPED	United States	Idaho	BREEDING	44.5327	-115.093	0.43	0.022	0.409	0.134	0.004	Secondary Check 2
2786	12	55	Saint_Paul_Field_2015	PI61576	6-row	3926	COLLECTED	Mongolia	NA	LANDRACE	47.2721	104.256	0.002	0.994	0.001	0.001	0.001
2787	12	54	Saint_Paul_Field_2015	PI327680	6-row	HOR 3324	COLLECTED	Ukraine	Odesa	LANDRACE	47.4104	29.667	0.262	0.002	0.008	0.724	0.004	NAM Parent
2788	12	53	Saint_Paul_Field_2015	CIho15582	6-row	QB 137.31	DEVELOPED	Canada	Quebec	BREEDING	53.2723	-73.2217	0.372	0.027	0.079	0.508	0.015
2789	12	52	Saint_Paul_Field_2015	PI640159	6-row	TX01D153	DEVELOPED	United States	Texas	BREEDING	30.2018	-98.2662	0.202	0.085	0.005	0.704	0.004
2790	12	51	Saint_Paul_Field_2015	PI328632	6-row	HOR 1379	COLLECTED	Greece	Crete	LANDRACE	35.3667	23.6333	0.387	0.002	0.002	0.003	0.606	NAM Parent
2791	12	50	Saint_Paul_Field_2015	PI640226	6-row	TX01D222	DEVELOPED	United States	Texas	BREEDING	30.4548	-98.0132	0.269	0.003	0.005	0.718	0.005	NAM Parent. Excluded from GWAS due to poor 50K genotyping quality.
2792	12	49	Saint_Paul_Field_2015	PI40387	6-row	July	DEVELOPED	Denmark	NA	CULTIVAR	56.024	9.22	0.006	0.003	0.022	0.967	0.003
2793	12	48	Saint_Paul_Field_2015	PI182625	6-row	Baitori No. 1	DEVELOPED	Japan	Kyoto	CULTIVAR	35.02	135.77	0.001	0.996	0.001	0.001	0.002
2794	12	47	Saint_Paul_Field_2015	PI163409	6-row	CIho 7624	COLLECTED	Argentina	Buenos Aires	UNCERTAIN	-36	-60	0.676	0.002	0.008	0.312	0.002	NAM Parent
2795	12	46	Saint_Paul_Field_2015	PI87180	6-row	Mugi	COLLECTED	Korea, South	Chungchong Puk	LANDRACE	36.2705	127.911	0.002	0.736	0.002	0.259	0.001
2796	12	45	Saint_Paul_Field_2015	PI264906	6-row	503	COLLECTED	Greece	Aegean Islands	LANDRACE	36.1833	27.8333	0.951	0.015	0.003	0.011	0.021
2797	12	44	Saint_Paul_Field_2015	PI328945	6-row	HOR 2486	COLLECTED	Italy	Calabria	LANDRACE	38.1	15.65	0.983	0.001	0.003	0.011	0.002
2798	12	43	Saint_Paul_Field_2015	CIho14881	6-row	ELS 6402-467	COLLECTED	Eritrea	Asmara	LANDRACE	15.1128	38.8746	0.003	0.029	0.003	0.468	0.498	NAM Parent
2799	12	42	Saint_Paul_Field_2015	CIho13651	6-row	H-2127	DEVELOPED	Israel	NA	BREEDING	31.664	35.287	0.935	0.009	0.041	0.009	0.005
2800	12	41	Saint_Paul_Field_2015	PI327716	6-row	HOR 3327	COLLECTED	Ukraine	Odesa	LANDRACE	47.4317	30.2145	0.251	0.003	0.007	0.736	0.003	NAM Parent
2801	12	40	Saint_Paul_Field_2015	PI640227	6-row	TX01D223	DEVELOPED	United States	Texas	BREEDING	30.3974	-98.0706	0.122	0.131	0.003	0.713	0.03
2802	12	39	Saint_Paul_Field_2015	PI57089	6-row	CIho 3230	COLLECTED	China	Hubei	LANDRACE	30.5833	114.317	0.002	0.988	0.003	0.003	0.003	NAM Parent
2803	12	38	Saint_Paul_Field_2015	PI640292	6-row	TX01D289	DEVELOPED	United States	Texas	BREEDING	30.1554	-98.3126	0.047	0.005	0.01	0.936	0.003
2804	12	37	Saint_Paul_Field_2015	CIho15498	6-row	WA 10081-63	DEVELOPED	United States	Washington	BREEDING	47.142	-119.908	0.509	0.008	0.003	0.005	0.475
2805	12	36	Saint_Paul_Field_2015	PI640298	6-row	TX01D295	DEVELOPED	United States	Texas	BREEDING	32.4616	-97.6254	0.282	0.076	0.003	0.614	0.025
2806	12	35	Saint_Paul_Field_2015	PI384986	2-row	Riso Mutant 56	DEVELOPED	Denmark	NA	BREEDING	56.4453	9.38674	0.006	0.001	0.982	0.006	0.005	NAM Parent
2807	12	34	Saint_Paul_Field_2015	CIho14281	2-row	CI 14281	COLLECTED	Venezuela	Tachira	UNCERTAIN	7.88013	-71.6398	0.005	0.002	0.655	0.335	0.002
2808	12	33	Saint_Paul_Field_2015	PI5873	2-row	Middle Barley	COLLECTED	Germany	Bavaria	LANDRACE	49.95	10.0833	0.004	0.002	0.436	0.555	0.002
2809	12	32	Saint_Paul_Field_2015	PI344942	2-row	74	COLLECTED	Bosnia and Herzegovina	NA	LANDRACE	43.9766	19.4733	0.005	0.004	0.748	0.242	0.002
2810	12	31	Saint_Paul_Field_2015	PI436151	2-row	297	COLLECTED	Chile	Los Lagos	LANDRACE	-40.2667	-72.8333	0.014	0.005	0.563	0.416	0.003	NAM Parent
2811	12	30	Saint_Paul_Field_2015	CIho4087	2-row	nudideficiens	COLLECTED	Russian Federation	NA	LANDRACE	61.58	105.39	0.154	0.397	0.26	0.024	0.165
2812	12	29	Saint_Paul_Field_2015	PI155303	2-row	CIho 7292	COLLECTED	Yemen	NA	LANDRACE	15.55	46.64	0.186	0.052	0.027	0.012	0.724
2813	12	28	Saint_Paul_Field_2015	PI295442	2-row	ELS 6302-74	COLLECTED	Ethiopia	Shewa	LANDRACE	9.35	38.7667	0.001	0.001	0.001	0.001	0.997
2814	12	27	Saint_Paul_Field_2015	PI349907	2-row	17-23/69	COLLECTED	Bosnia and Herzegovina	NA	LANDRACE	43.7614	19.4617	0.008	0.002	0.672	0.316	0.002
2815	12	26	Saint_Paul_Field_2015	PI283415	2-row	0-21-026	COLLECTED	Czechoslovakia	NA	UNCERTAIN	49.197	17.418	0.001	0.002	0.001	0.001	0.995
2816	12	25	Saint_Paul_Field_2015	PI60679	6-row	Vagabond	COLLECTED	Egypt	Giza	LANDRACE	NA	NA	NA	NA	NA	NA	NA	Excluded from GWAS due to high amounts of missing SNP data or heterozygosity. Looks 6-row in field. Categorized as 2-row in GrainGenes and Muñoz-Amatriaín et al. 2014. Categorized as 6-row in GRIN.
2817	12	24	Saint_Paul_Field_2015	PI525199	2-row	Beatrice	DEVELOPED	France	Yvelines	CULTIVAR	48.374	2.313	0.047	0.003	0.76	0.063	0.127
2818	12	23	Saint_Paul_Field_2015	PI60701	2-row	Sinai	COLLECTED	Egypt	Sinai	LANDRACE	NA	NA	NA	NA	NA	NA	NA	Excluded from GWAS due to high amounts of missing SNP data or heterozygosity.
2819	12	22	Saint_Paul_Field_2015	PI574091	6-row	RNB-376	COLLECTED	Nepal	Mechi	LANDRACE	26.7304	87.9003	0.093	0.866	0.004	0.016	0.02	Looks 6-row in field. Categorized as 2-row in Muñoz-Amatriaín et al. 2014. Categorized as 6-row in GrainGenes and "IRREGULARE; 2 AND 6 CHARACTERS ON THE SAME SPIKE" in GRIN
2820	12	21	Saint_Paul_Field_2015	PI643368	2-row	ND22996	DEVELOPED	United States	North Dakota	BREEDING	47.6963	-100.885	0.002	0.003	0.524	0.466	0.004
2821	12	20	Saint_Paul_Field_2015	PI467851	2-row	FM 438	DEVELOPED	Brazil	Rio Grande do Sul	CULTIVAR	-28.732	-54.671	0.003	0.002	0.766	0.227	0.001	NAM Parent
2822	12	19	Saint_Paul_Field_2015	PI57095	2-row	CIho 3347	COLLECTED	Georgia	NA	LANDRACE	42.6848	43.7263	0.041	0.089	0.637	0.175	0.058
2823	12	18	Saint_Paul_Field_2015	PI349896	2-row	25362	COLLECTED	Serbia	NA	LANDRACE	43.445	19.7528	0.001	0.001	0.995	0.001	0.001	NAM Parent
2824	12	17	Saint_Paul_Field_2015	PI404205	2-row	Suvenir	DEVELOPED	Belarus	Minsk	CULTIVAR	53.897	27.677	0.002	0.001	0.962	0.033	0.002	NAM Parent
2825	12	16	Saint_Paul_Field_2015	PI365439	2-row	Hassan	DEVELOPED	Netherlands	South Holland	CULTIVAR	51.884	7.779	0.024	0.004	0.94	0.014	0.018
2826	12	15	Saint_Paul_Field_2015	PI643377	2-row	ND24393	DEVELOPED	United States	North Dakota	BREEDING	47.2022	-101.351	0.012	0.011	0.481	0.494	0.003
2827	12	14	Saint_Paul_Field_2015	PI643231	2-row	ND4998	DEVELOPED	United States	North Dakota	BREEDING	47.1102	-100.747	0.002	0.003	0.581	0.412	0.002
2828	12	13	Saint_Paul_Field_2015	PI190200	2-row	Aurore 1	DONATED	Europe	NA	UNCERTAIN	54.526	15.2551	0.001	0.001	0.996	0.001	0.001	NAM Parent
2829	12	12	Saint_Paul_Field_2015	PI614939	2-row	Heris	DEVELOPED	Czech Republic	South Moravia	CULTIVAR	48.994	16.847	0.036	0.06	0.819	0.004	0.08	Secondary Check 1
2830	12	11	Saint_Paul_Field_2015	PI447054	2-row	NA	DEVELOPED	Spain	Zaragoza	BREEDING	41.2398	-0.997985	0.219	0.029	0.486	0.138	0.129	NAM Parent
2831	12	10	Saint_Paul_Field_2015	PI371298	2-row	1928D	COLLECTED	Switzerland	Valais	LANDRACE	46.0037	6.99651	0.003	0.002	0.566	0.422	0.006
2832	12	9	Saint_Paul_Field_2015	PI422232	2-row	NA	COLLECTED	Yemen	NA	LANDRACE	15.5459	44.5723	0.111	0.011	0.114	0.03	0.735
2833	12	8	Saint_Paul_Field_2015	PI382437	2-row	GAW 138-3	COLLECTED	Ethiopia	Shewa	LANDRACE	8.41667	39.3833	0.002	0.002	0.003	0.002	0.991
2834	12	7	Saint_Paul_Field_2015	PI285636	2-row	Refleks	DEVELOPED	Poland	NA	CULTIVAR	53.052	22.843	0.002	0.002	0.988	0.006	0.002	NAM Parent
2835	12	6	Saint_Paul_Field_2015	PI331217	2-row	290b	COLLECTED	Eritrea	Asmara	LANDRACE	15.5891	38.8535	0.004	0.003	0.009	0.004	0.981
2836	12	5	Saint_Paul_Field_2015	PI264251	2-row	Tokak	COLLECTED	Turkey	Ankara	LANDRACE	40.0696	32.8275	0.189	0.097	0.421	0.14	0.153	NAM Parent
2837	12	4	Saint_Paul_Field_2015	PI584803	2-row	Birgitta	DEVELOPED	Sweden	Malmohus	CULTIVAR	NA	NA	NA	NA	NA	NA	NA	Excluded from GWAS due to high amounts of missing SNP data or heterozygosity.
2838	12	3	Saint_Paul_Field_2015	PI643274	2-row	ND13296	DEVELOPED	United States	North Dakota	BREEDING	47.4302	-101.334	0.006	0.006	0.531	0.455	0.002
2839	12	2	Saint_Paul_Field_2015	PI328336	2-row	HOR 606	COLLECTED	Turkey	NA	LANDRACE	38.7918	37.9844	0.071	0.369	0.333	0.026	0.202	NAM Parent
2840	12	1	Saint_Paul_Field_2015	PI467519	2-row	Gabelstorfer Barden	DEVELOPED	Germany	NA	CULTIVAR	50.501	11.41	0.012	0.007	0.785	0.194	0.002

## Sheet: 2015_Field_Design
	Type II Modified Augmented Design
	70 columns x 12 rows
	1	2	3	4	5	6	7	8	9	10	11	12	13	14	15	16	17	18	19	20	21	22	23	24	25	26	27	28	29	30	31	32	33	34	35	36	37	38	39	40	41	42	43	44	45	46	47	48	49
12	2840	2839	2838	2837	2836	2835	2834	2833	2832	2831	2830	2829	2828	2827	2826	2825	2824	2823	2822	2821	2820	2819	2818	2817	2816	2815	2814	2813	2812	2811	2810	2809	2808	2807	2806	2805	2804	2803	2802	2801	2800	2799	2798	2797	2796	2795	2794	2793	2792
11	2701	2702	2703	2704	2705	2706	2707	2708	2709	2710	2711	2712	2713	2714	2715	2716	2717	2718	2719	2720	2721	2722	2723	2724	2725	2726	2727	2728	2729	2730	2731	2732	2733	2734	2735	2736	2737	2738	2739	2740	2741	2742	2743	2744	2745	2746	2747	2748	2749
10	2700	2699	2698	2697	2696	2695	2694	2693	2692	2691	2690	2689	2688	2687	2686	2685	2684	2683	2682	2681	2680	2679	2678	2677	2676	2675	2674	2673	2672	2671	2670	2669	2668	2667	2666	2665	2664	2663	2662	2661	2660	2659	2658	2657	2656	2655	2654	2653	2652
9	2561	2562	2563	2564	2565	2566	2567	2568	2569	2570	2571	2572	2573	2574	2575	2576	2577	2578	2579	2580	2581	2582	2583	2584	2585	2586	2587	2588	2589	2590	2591	2592	2593	2594	2595	2596	2597	2598	2599	2600	2601	2602	2603	2604	2605	2606	2607	2608	2609
8	2560	2559	2558	2557	2556	2555	2554	2553	2552	2551	2550	2549	2548	2547	2546	2545	2544	2543	2542	2541	2540	2539	2538	2537	2536	2535	2534	2533	2532	2531	2530	2529	2528	2527	2526	2525	2524	2523	2522	2521	2520	2519	2518	2517	2516	2515	2514	2513	2512
7	2421	2422	2423	2424	2425	2426	2427	2428	2429	2430	2431	2432	2433	2434	2435	2436	2437	2438	2439	2440	2441	2442	2443	2444	2445	2446	2447	2448	2449	2450	2451	2452	2453	2454	2455	2456	2457	2458	2459	2460	2461	2462	2463	2464	2465	2466	2467	2468	2469
6	2420	2419	2418	2417	2416	2415	2414	2413	2412	2411	2410	2409	2408	2407	2406	2405	2404	2403	2402	2401	2400	2399	2398	2397	2396	2395	2394	2393	2392	2391	2390	2389	2388	2387	2386	2385	2384	2383	2382	2381	2380	2379	2378	2377	2376	2375	2374	2373	2372
5	2281	2282	2283	2284	2285	2286	2287	2288	2289	2290	2291	2292	2293	2294	2295	2296	2297	2298	2299	2300	2301	2302	2303	2304	2305	2306	2307	2308	2309	2310	2311	2312	2313	2314	2315	2316	2317	2318	2319	2320	2321	2322	2323	2324	2325	2326	2327	2328	2329
4	2280	2279	2278	2277	2276	2275	2274	2273	2272	2271	2270	2269	2268	2267	2266	2265	2264	2263	2262	2261	2260	2259	2258	2257	2256	2255	2254	2253	2252	2251	2250	2249	2248	2247	2246	2245	2244	2243	2242	2241	2240	2239	2238	2237	2236	2235	2234	2233	2232
3	2141	2142	2143	2144	2145	2146	2147	2148	2149	2150	2151	2152	2153	2154	2155	2156	2157	2158	2159	2160	2161	2162	2163	2164	2165	2166	2167	2168	2169	2170	2171	2172	2173	2174	2175	2176	2177	2178	2179	2180	2181	2182	2183	2184	2185	2186	2187	2188	2189
2	2140	2139	2138	2137	2136	2135	2134	2133	2132	2131	2130	2129	2128	2127	2126	2125	2124	2123	2122	2121	2120	2119	2118	2117	2116	2115	2114	2113	2112	2111	2110	2109	2108	2107	2106	2105	2104	2103	2102	2101	2100	2099	2098	2097	2096	2095	2094	2093	2092
1	2001	2002	2003	2004	2005	2006	2007	2008	2009	2010	2011	2012	2013	2014	2015	2016	2017	2018	2019	2020	2021	2022	2023	2024	2025	2026	2027	2028	2029	2030	2031	2032	2033	2034	2035	2036	2037	2038	2039	2040	2041	2042	2043	2044	2045	2046	2047	2048	2049
	Primary Check
	Secondary Check 1
	Secondary Check 2
	Individual blocks are outlined with a thicker line
[truncated: 21 more columns]

## Sheet: 2016_Planting_List
Plot	Accession	Spike Type	Block		Plot	Accession	Spike Type	Block		Plot	Line ID	Spike Type	Block
3001	Rasmussen	6-row	1		3011	PI415348	6-row	2		3021	PI282616	6-row	3
3002	PI392478	2-row	1		3012	CIho02367	6-row	2		3022	PI321823	2-row	3
3003	PI640292	6-row	1		3013	PI374429	2-row	2		3023	PI592267	2-row	3
3004	Conlon	2-row	1		3014	PI362203	2-row	2		3024	PI285118	2-row	3
3005	PI342283	2-row	1		3015	PI640340	6-row	2		3025	PI182687	2-row	3
3006	PI371248	2-row	1		3016	PI290193	2-row	2		3026	PI402164	6-row	3
3007	PI321823	2-row	1		3017	PI342283	2-row	2		3027	PI564501	6-row	3
3008	PI057099	2-row	1		3018	PI057099	2-row	2		3028	PI357314	2-row	3
3009	PI390281	6-row	1		3019	PI371248	2-row	2		3029	PI574094	6-row	3
3010	PI274620	2-row	1		3020	PI296995	2-row	2		3030	PI356580	6-row	3
3051	CIho15362	6-row	1		3041	PI054915	6-row	2		3031	PI054915	6-row	3
3052	PI574091	6-row	1		3042	Rasmussen	6-row	2		3032	PI057099	2-row	3
3053	PI328742	2-row	1		3043	PI564501	6-row	2		3033	PI574091	6-row	3
3054	PI296995	2-row	1		3044	PI190203	2-row	2		3034	CIho4050	6-row	3
3055	PI599625	2-row	1		3045	PI285118	2-row	2		3035	PI467733	6-row	3
3056	PI357314	2-row	1		3046	PI467758	6-row	2		3036	PI640292	6-row	3
3057	PI574094	6-row	1		3047	PI039590	6-row	2		3037	PI328155	6-row	3
3058	PI592267	2-row	1		3048	PI182687	2-row	2		3038	PI076285	6-row	3
3059	CIho15349	6-row	1		3049	PI328742	2-row	2		3039	CIho05989	2-row	3
3060	PI163409	6-row	1		3050	CIho15362	6-row	2		3040	PI362203	2-row	3
3061	PI362203	2-row	1		3071	CIho07247	6-row	2		3081	Conlon	2-row	3
3062	CIho04184	6-row	1		3072	PI298708	6-row	2		3082	PI039590	6-row	3
3063	PI402164	6-row	1		3073	CIho10034	6-row	2		3083	CIho04184	6-row	3
3064	CIho07247	6-row	1		3074	PI365547	2-row	2		3084	PI365547	2-row	3
3065	PI182687	2-row	1		3075	PI357314	2-row	2		3085	PI274620	2-row	3
3066	PI87844	6-row	1		3076	PI390281	6-row	2		3086	PI640340	6-row	3
3067	PI564501	6-row	1		3077	Conlon	2-row	2		3087	Rasmussen	6-row	3
3068	PI640340	6-row	1		3078	CIho15349	6-row	2		3088	PI390281	6-row	3
3069	CIho11588	2-row	1		3079	PI392484	2-row	2		3089	PI87844	6-row	3
3070	PI298708	6-row	1		3080	CIho04184	6-row	2		3090	PI346387	2-row	3
3111	CIho10034	6-row	1		3101	CIho4050	6-row	2		3091	PI640166	6-row	3
3112	PI285118	2-row	1		3102	PI163409	6-row	2		3092	PI467758	6-row	3
3113	PI365547	2-row	1		3103	CIho11588	2-row	2		3093	CIho07247	6-row	3
3114	PI374429	2-row	1		3104	PI392478	2-row	2		3094	PI163409	6-row	3
3115	Rasmussen	6-row	1		3105	PI076285	6-row	2		3095	CIho02367	6-row	3
3116	PI328155	6-row	1		3106	PI574094	6-row	2		3096	CIho15349	6-row	3
3117	PI039590	6-row	1		3107	PI402016	2-row	2		3097	PI048133	6-row	3
3118	CIho05989	2-row	1		3108	PI640166	6-row	2		3098	PI374429	2-row	3
3119	CIho13135	2-row	1		3109	PI321823	2-row	2		3099	PI328742	2-row	3
3120	PI190203	2-row	1		3110	PI129482	6-row	2		3100	CIho13135	2-row	3
3121	PI282616	6-row	1		3131	PI599625	2-row	2		3141	PI371248	2-row	3
3122	PI076285	6-row	1		3132	PI346387	2-row	2		3142	PI290193	2-row	3
3123	PI467758	6-row	1		3133	CIho05989	2-row	2		3143	CIho10034	6-row	3
3124	PI467733	6-row	1		3134	CIho13135	2-row	2		3144	PI467729	2-row	3
3125	PI467729	2-row	1		3135	PI356580	6-row	2		3145	PI415348	6-row	3
3126	Conlon	2-row	1		3136	PI574091	6-row	2		3146	PI392484	2-row	3
3127	PI290193	2-row	1		3137	PI048133	6-row	2		3147	PI402016	2-row	3
3128	PI415348	6-row	1		3138	Rasmussen	6-row	2		3148	PI342283	2-row	3
3129	PI640166	6-row	1		3139	PI268176	2-row	2		3149	PI190203	2-row	3
3130	PI048133	6-row	1		3140	PI467729	2-row	2		3150	Conlon	2-row	3
3171	PI129482	6-row	1		3161	PI87844	6-row	2		3151	PI129482	6-row	3
3172	CIho4050	6-row	1		3162	PI467733	6-row	2		3152	Rasmussen	6-row	3
3173	PI436154	2-row	1		3163	PI436154	2-row	2		3153	PI296995	2-row	3
3174	PI356580	6-row	1		3164	PI282616	6-row	2		3154	PI298708	6-row	3
3175	CIho02367	6-row	1		3165	PI402164	6-row	2		3155	PI268176	2-row	3
3176	PI346387	2-row	1		3166	Conlon	2-row	2		3156	CIho11588	2-row	3
3177	PI392484	2-row	1		3167	PI592267	2-row	2		3157	PI392478	2-row	3
3178	PI402016	2-row	1		3168	PI274620	2-row	2		3158	PI436154	2-row	3
3179	PI054915	6-row	1		3169	PI640292	6-row	2		3159	PI599625	2-row	3
3180	PI268176	2-row	1		3170	PI328155	6-row	2		3160	CIho15362	6-row	3

## Sheet: 2016_Field_Design
	Randomized Complete Block Design
	1	2	3	4	5	6	7	8	9	10	11	12	13	14	15	16	17	18	19	20	21	22	23	24	25	26	27	28	29	30
6	3180	3179	3178	3177	3176	3175	3174	3173	3172	3171	3170	3169	3168	3167	3166	3165	3164	3163	3162	3161	3160	3159	3158	3157	3156	3155	3154	3153	3152	3151
5	3121	3122	3123	3124	3125	3126	3127	3128	3129	3130	3131	3132	3133	3134	3135	3136	3137	3138	3139	3140	3141	3142	3143	3144	3145	3146	3147	3148	3149	3150
4	3120	3119	3118	3117	3116	3115	3114	3113	3112	3111	3110	3109	3108	3107	3106	3105	3104	3103	3102	3101	3100	3099	3098	3097	3096	3095	3094	3093	3092	3091
3	3061	3062	3063	3064	3065	3066	3067	3068	3069	3070	3071	3072	3073	3074	3075	3076	3077	3078	3079	3080	3081	3082	3083	3084	3085	3086	3087	3088	3089	3090
2	3060	3059	3058	3057	3056	3055	3054	3053	3052	3051	3050	3049	3048	3047	3046	3045	3044	3043	3042	3041	3040	3039	3038	3037	3036	3035	3034	3033	3032	3031
1	3001	3002	3003	3004	3005	3006	3007	3008	3009	3010	3011	3012	3013	3014	3015	3016	3017	3018	3019	3020	3021	3022	3023	3024	3025	3026	3027	3028	3029	3030
	1	2	3	4	5	6	7	8	9	10	11	12	13	14	15	16	17	18	19	20	21	22	23	24	25	26	27	28	29	30
	Block 1										Block 2										Block 3

## Sheet: ReadMe
SP1-SP5 includes assignment ratios for each line to the five STRUCTURE subpopulations
Latitude and longitude information in this table was used to make the world map in Figure S5
